# Supplementary material for: De Novo Transcriptome Sequencing Analysis of cDNA Library and Large-Scale Unigene Assembly in Japanese Red Pine (Pinus densiflora)
Source: Int J Mol Sci. 2015 Dec 4;16(12):29047–59. doi: 10.3390/ijms161226139 (PMC4691086; doi:10.3390/ijms161226139)
Supplement: Supplementary file 1 [file ijms-16-26139-s001.xlsx]

## Sheet: Table S1
Table S1. SSR motif sequence types identified by MISA.
Definement of microsatellites (unit size / minimum number of repeats):
(2/6) (3/5) (4/5) (5/4) (6/4)
Total number of sequences examined: 83913
Total size of examined sequences (bp): 63099974
Total number of identified SSRs: 1953
Number of SSR containing sequences: 1784
Number of sequences containing more than 1 SSR: 167
Unit size	Number of SSRs
2	703
3	980
4	30
5	77
6	163
Frequency of identified SSR motifs
----------------------------------
Repeats	4	5	6	7	8	9	10	11	12	13	14	15	16	17	18	19	20	21	22	23	total
AC	-	-	10	12	3	2		1													28
AG	-	-	30	15	3	5		1													54
AT	-	-	93	43	40	24	39	22	1												262
CA	-	-	5	6	1	4	3		1												20
CT	-	-	25	11	7	2															45
GA	-	-	26	13	3	2		2													46
GC	-	-	1	2																	3
GT	-	-	6	1	3	1			1												12
TA	-	-	63	31	27	13	16	14													164
TC	-	-	21	4	13	2															40
TG	-	-	18	4	5	1		1													29
AAC	-	5	3																		8
AAG	-	20	10	1																	31
AAT	-	16	2	5	1																24
ACA	-	2																			2
ACC	-	2																			2
AGA	-	38	4	4																	46
AGC	-	27	5	2																	34
AGG	-	15	3	5																	23
AGT	-	1																			1
ATA	-	14	6	2																	22
ATC	-	13	2	3																	18
ATG	-	17	5	3																	25
ATT	-	11	5	2				1													19
CAA	-	11	2																		13
CAC	-	8	5																		13
CAG	-	32	17	7																	56
CAT	-	22	6																		28
CCA	-	10	6	1		1															18
CCT	-	12	6	1	1																20
CGA	-	1																			1
CGC	-	1																			1
CGT	-	1	1																		2
CTA	-	1																			1
CTC	-	22	2	4																	28
CTG	-	26	5	1	2																34
CTT	-	14	3	6																	23
GAA	-	30	10	3	2																45
GAC	-	4																			4
GAG	-	21	11	3																	35
GAT	-	20	1	2	1										1						25
GCA	-	17	2	5	2																26
GCC	-	7	3	1																	11
GCG	-	3	2																		5
GCT	-	5	5	1																	11
GGA	-	25	2	1	2																30
GGC	-	6	4																		10
GGT	-	10	3	1																	14
GTC	-		2	1																	3
GTG	-	6	4																		10
GTT	-	3		1																	4
TAA	-	15	3	1	1																20
TAC	-	1																			1
TAG	-	1																			1
TAT	-	7	2																		9
TCA	-	8			1																9
TCC	-	14	7	1	2																24
TCG	-	7																			7
TCT	-	21	7	4																	32
TGA	-	10	9	1																	20
TGC	-	32	9	4																	45
TGG	-	16		2																	18
TGT	-	2	1																		3
TTA	-	13		1																	14
TTC	-	27	6	6																	39
TTG	-	10	1		1																12
AAAT	-	2																			2
AACC	-	1																			1
AATA	-	1																			1
AATT	-	1																			1
AGCC	-	1																			1
AGGC	-	4																			4
ATCT	-	1																			1
ATTT	-	3																			3
CAGA	-		1																		1
CATC	-	1																			1
CTTC	-	1																			1
GAAA	-	1																			1
GACT	-	1																			1
GATG	-	1																			1
GTTT	-	1																			1
TTAT	-	1																			1
TTCC	-	4																			4
TTTC	-	3																			3
TTTG	-	1																			1
AAAAT	1																				1
AAAGG	1																				1
AAATT	1																				1
AATAA	2																				2
AATCC	1																				1
ACCAT	1																				1
ACCTC	1																				1
AGAGA	1																				1
AGAGC	1																				1
AGAGG	1																				1
AGATC	1																				1
AGCAA	1																				1
AGCCC	1																				1
AGCTG	1																				1
AGGAG	1																				1
AGGGC	3	1																			4
ATAAA	1																				1
ATCAA	1																				1
ATGTG	1																				1
ATTCA	1																				1
ATTTT	1																				1
CATCC	1																				1
CATCT	2																				2
CATGG	1																				1
CCACT	1																				1
CCGTC	2																				2
CCTTC	1																				1
CGTGT	1																				1
CTGAG	1																				1
CTGCT	1																				1
CTGGG		1																			1
CTTCA	1																				1
CTTTT		2																			2
GAATT	1																				1
GACTG	1																				1
GAGCA		1																			1
GAGCC	1																				1
GATCA		1																			1
GATTC	1																				1
GCCCA		2																			2
GCCTC	2																				2
GGACT	2																				2
GGATT	1																				1
GGGAA	2																				2
GGTTC	1																				1
GGTTT	1																				1
TAGCA	1																				1
TATTA	1																				1
TATTT		1																			1
TCATC		2																			2
TCTGC	1																				1
TGAAT	2																				2
TGCAT	1																				1
TGCCT	1																				1
TGGTG	1																				1
TGTTC		1																			1
TGTTT	2																				2
TTATT	1																				1
TTCTA	1																				1
TTGGA	1																				1
TTTAA	1																				1
TTTAC	1																				1
TTTTG	1																				1
AAATAG	1																				1
AACAAG	1																				1
AACCTC	1																				1
AAGGGC	2																				2
ACACTC	1																				1
ACCTCC	4																				4
AGAGCG	1																				1
AGGAGA	1																				1
AGGCAA	1																				1
AGGCCA	1																				1
AGGCGG	1																				1
AGGCTG	1																				1
AGGGCT	2																				2
AGGTAG	1																				1
AGGTGG	2																				2
AGGTTG	1			1																	2
AGTTGG	1																				1
ATAGAA	1																				1
ATATCT	1																				1
ATGCTC	1																				1
ATGGAT	1																				1
ATGGGC	3																				3
ATGGGT	1																				1
ATTCCC	1																				1
ATTTTT	1																				1
CAAAAT	4																				4
CAGCAC	1																				1
CAGCCT	1																				1
CAGCTC		1																			1
CAGGAA				1						1											2
CAGGCA	1																				1
CAGGCT	1																				1
CATCAC	1																				1
CCACAG		3	1																		4
CCACCT	1																				1
CCAGCA	2																				2
CCATCA	1																				1
CCATCC	2																				2
CCGCCA		1																			1
CCGCCT	1																				1
CCTGGA	1																				1
CCTTTC	1																				1
CGGGGA	1																				1
CTAGCC	1																				1
CTCAAC	1																				1
CTCCAC	3																				3
CTCCTG	1																				1
CTCCTT	1																				1
CTCGCC			1																		1
CTCTCC	1																				1
CTGCCT		1																			1
CTGCGG	1																				1
CTGCTT	1																				1
CTTGTG	2																				2
GAAACG	1																				1
GAAGGA	1																				1
GAATCA	1																				1
GACATG	1																				1
GACCTC	1																				1
GAGAAG	1																				1
GAGATG	1																				1
GAGGCT	1																				1
GATCAG	1																				1
GATCTC	1																				1
GATGAA	2																				2
GATGGA				1				1													2
GCAGAC	1																				1
GCAGGA	1																				1
GCCATT	1																				1
GCGGTG	1																				1
GCGTGG	1																				1
GCTCTG	1																				1
GGAAGA	1																				1
GGAGAG	5																				5
GGAGCC	1																				1
GGAGTG	1																				1
GGCACT	1																				1
GGCATC	1																				1
GGTCCA		3																			3
GGTGGA	1																				1
GGTGGC	1																				1
GTGGGC			1																		1
GTTCGA	1																				1
GTTTCC	1																				1
TATTTG	4																				4
TCAACA	1																				1
TCACAC	4																				4
TCACCA	1																				1
TCACCT	1																				1
TCAGCA	2																				2
TCAGCC	1																				1
TCATAT	2																				2
TCCTGC	1																				1
TCGCCT			1																		1
TCTTCA	1																				1
TGAAGG	1																				1
TGAGAG	2																				2
TGATGC	3																				3
TGCCCC	3																				3
TGCTCC	1																				1
TGCTGG	1																				1
TGGAAA	4																				4
TGGATG	1																				1
TGGCAC		1																			1
TGGCTG	1																				1
TGTTCA	1																				1
TTAAAA	1																				1
TTCGTC	1																				1
TTCTCC	1																				1
TTCTTT	1																				1
TTGAAC	2																				2
TTGATA						2															2
TTGCCG	1																				1
TTGTCC	1																				1
TTTTTG	2																				2
Frequency of classified repeat types (considering sequence complementary)
-------------------------------------------------------------------------
Repeats	4	5	6	7	8	9	10	11	12	13	14	15	16	17	18	19	20	21	22	23	total
AC/GT	-	-	39	23	12	8	3	2	2												89
AG/CT	-	-	102	43	26	11		3													185
AT/AT	-	-	156	74	67	37	55	36	1												426
CG/CG	-	-	1	2																	3
AAC/GTT	-	33	7	1	1																42
AAG/CTT	-	150	40	24	2																216
AAT/ATT	-	76	18	11	2			1													108
ACC/GGT	-	52	18	4		1															75
ACG/CGT	-	13	3	1																	17
ACT/AGT	-	4																			4
AGC/CTG	-	139	43	20	4																206
AGG/CCT	-	109	31	15	5																160
ATC/ATG	-	90	23	9	2										1						125
CCG/CGG	-	17	9	1																	27
AAAC/GTTT	-	2																			2
AAAG/CTTT	-	4																			4
AAAT/ATTT	-	7																			7
AACC/GGTT	-	1																			1
AAGG/CCTT	-	5																			5
AATT/AATT	-	1																			1
ACAG/CTGT	-		1																		1
ACTG/AGTC	-	1																			1
AGAT/ATCT	-	1																			1
AGCC/CTGG	-	1																			1
AGGC/CCTG	-	4																			4
ATCC/ATGG	-	2																			2
AAAAC/GTTTT	3																				3
AAAAG/CTTTT		2																			2
AAAAT/ATTTT	6	1																			7
AAACC/GGTTT	1																				1
AAAGC/CTTTG	1																				1
AAAGG/CCTTT	1																				1
AAAGT/ACTTT	1																				1
AAATC/ATTTG	1																				1
AAATT/AATTT	2																				2
AACAG/CTGTT		1																			1
AACCG/CGGTT	1																				1
AAGAG/CTCTT	1																				1
AAGGC/CCTTG	1																				1
AAGGG/CCCTT	3																				3
AAGTG/ACTTC	1																				1
AATAG/ATTCT	1																				1
AATAT/ATATT	1																				1
AATCC/ATTGG	3																				3
AATCG/ATTCG	1																				1
AATGC/ATTGC	1																				1
AATTC/AATTG	4																				4
ACACC/GGTGT	1																				1
ACACG/CGTGT	1																				1
ACATC/ATGTG	1																				1
ACCAT/ATGGT	1																				1
ACCTC/AGGTG	1																				1
ACGGG/CCCGT	2																				2
ACTCC/AGTGG	1																				1
ACTGG/AGTCC	3																				3
AGAGC/CTCTG	3	1																			4
AGAGG/CCTCT	2																				2
AGATC/ATCTG	1	1																			2
AGATG/ATCTC	2	2																			4
AGCAT/ATGCT	1																				1
AGCCC/CTGGG	1	3																			4
AGCCG/CGGCT	1																				1
AGCTC/AGCTG	2																				2
AGGCG/CCTCG	2																				2
AGGGC/CCCTG	3	1																			4
ATCCC/ATGGG	1																				1
ATGCC/ATGGC	1																				1
AAAAAC/GTTTTT	2																				2
AAAAAG/CTTTTT	1																				1
AAAAAT/ATTTTT	1																				1
AAAATC/ATTTTG	4																				4
AAAATT/AATTTT	1																				1
AAACGG/CCGTTT	2																				2
AAAGGC/CCTTTG	1																				1
AAAGGG/CCCTTT	1																				1
AAATAC/ATTTGT	4																				4
AAATAG/ATTTCT	2																				2
AAATGG/ATTTCC	4																				4
AACAAG/CTTGTT	1																				1
AACAGG/CCTGTT				1						1											2
AACATC/ATGTTG	1																				1
AACATG/ATGTTC	1																				1
AACCTC/AGGTTG	3			1																	4
AACGGC/CCGTTG	1																				1
AACTCC/AGTTGG	1																				1
AACTCG/AGTTCG	1																				1
AACTTG/AAGTTC	2																				2
AAGACG/CGTCTT	1																				1
AAGAGG/CCTCTT	1																				1
AAGATG/ATCTTC	3																				3
AAGCAC/CTTGTG	2																				2
AAGCAG/CTGCTT	1																				1
AAGGAC/CCTTGT	1																				1
AAGGAG/CCTTCT	5																				5
AAGGCC/CCTTGG	1																				1
AAGGCG/CCTTCG			1																		1
AAGGGC/CCCTTG	2																				2
AAGGTG/ACCTTC	2																				2
AATATC/ATATTG						2															2
AATATG/ATATTC	2																				2
AATCAG/ATTCTG	1																				1
AATGGC/ATTGCC	1																				1
AATGGG/ATTCCC	1																				1
ACACTC/AGTGTG	5																				5
ACAGCC/CTGTGG	1	3	1																		5
ACAGGC/CCTGTG	1																				1
ACATCC/ATGTGG	1																				1
ACATGG/ATGTCC	1																				1
ACCAGC/CTGGTG	4																				4
ACCATC/ATGGTG	3																				3
ACCCAT/ATGGGT	1																				1
ACCGCC/CGGTGG	2	1																			3
ACCTCC/AGGTGG	11																				11
ACCTCG/AGGTCG	1																				1
ACCTCT/AGAGGT	1																				1
ACCTGG/AGGTCC	1	3																			4
ACGCAG/CGTCTG	1																				1
ACGCCC/CGTGGG	1		1																		2
ACGGGG/CCCCGT	1																				1
ACTCCC/AGTGGG	1																				1
ACTCTC/AGAGTG	2																				2
ACTGGC/AGTGCC	1	1																			2
AGAGCC/CTCTGG	1																				1
AGAGCG/CGCTCT	1																				1
AGAGGC/CCTCTG		1																			1
AGAGGG/CCCTCT	6																				6
AGATAT/ATATCT	1																				1
AGATCG/ATCTCG	1																				1
AGATGG/ATCTCC	1			1				1													3
AGCAGG/CCTGCT	4																				4
AGCATC/ATGCTG	5																				5
AGCATG/ATGCTC	1																				1
AGCCCT/AGGGCT	3																				3
AGCCGC/CGGCTG	1																				1
AGCCGG/CCGGCT	1																				1
AGCCTC/AGGCTG	4																				4
AGCCTG/AGGCTC	1																				1
AGCTCC/AGCTGG		1																			1
AGGATC/ATCCTG	1																				1
AGGCGG/CCGCCT	2																				2
AGGGCG/CCCTCG			1																		1
AGGGGC/CCCCTG	3																				3
ATATCC/ATATGG	1																				1
ATCCCC/ATGGGG	2																				2
ATCGGC/ATGCCG	1																				1
ATGCCC/ATGGGC	3																				3

## Sheet: Table S2
Table S2. PCR primers for the conserved flanking regions of the SSRs.
ID	SSR	SSR	Sequence	FORWARD PRIMER1 (5'-3')	Tm	REVERSE PRIMER1 (5'-3')	Tm
CL10184.Contig3	CATCATCATCATCATCAT	CAT(3*6)	AAAGGAGAAGGTAGCAGACGATTGGAAGGAAAAAGTCATAAG[CATCATCATCATCATCAT]CACGGCCATCACCAGGGTAAGCGGAAGAAGGAAGAAGGGGGAGGCTCCAGAGATAATGCGAGCAAGAAGAGAGTG	AAAGGAGAAGGTAGCAGACGATT	59.81	CACTCTCTTCTTGCTCGCATTAT	60.055
CL10187.Contig1	GGAGGAGGAGGAGGAGGAGGA	GGA(3*7)	TTTCTGAATTTCTAAAGGCGGAGGGAGAGCCGGTGCCCGAGGTTAATTCAGAGGCGGCGGGAGGAGGAGGAAATAATTTCGGAGGCAGCGGC[GGAGGAGGAGGAGGAGGAGGA]AGAAGAAGAGGAGGAGCCGGGGCAGAAGGTGATGGTGTAATCAGTGG	TTTCTGAATTTCTAAAGGCGGAG	61.006	CCACTGATTACACCATCACCTTC	60.655
CL10187.Contig2	GGAGGAGGAGGAGGAGGAGGAGGA	GGA(3*8)	AGCTTGCTTCCGTAGTTTTAACCCAAAGGAGGAGACGGTGGAGGGCGAAGCGGAGGCGGAGGCGGAGGAAGAAGAGGC[GGAGGAGGAGGAGGAGGAGGAGGA]AGAAGAAGAGGAGGAGCCGGGGCAGAAGGTGATGGTGTAATCAGTGGAGGATGATGTG	AGCTTGCTTCCGTAGTTTTAACC	60.188	CACATCATCCTCCACTGATTACA	59.867
CL10315.Contig1	CCTCCTCCTCCTCCT	CCT(3*5)	TAAATAAGGATTTGCGCAGAAAGTTGTTCGGCCGCTTTCGGAGGTTCAGAGGTGGTCGTAGCCGAAGCAGGAGCCGAAGTCTGAGTCCTCTC[CCTCCTCCTCCTCCT]CGGTCTCGCCGGTACGATGACCGGGGGAACGGGAGGAGGTATGATGATCGAGA	TAAATAAGGATTTGCGCAGAAAG	59.785	TCTCGATCATCATACCTCCTCC	60.431
CL10337.Contig2	TGCTGCTGCTGCTGC	TGC(3*5)	CAGAAATCGATATTGTTCCAACCAT[TGCTGCTGCTGCTGC]GGCGGCACAAAAGGACTTTCTGAATCGAAAAAAGGTGATTGAAGCCACTGGACGAGAGAATCGGTTCCCATCAAAGGCACATGATAAAAT	CAGAAATCGATATTGTTCCAACC	59.729	ATTTTATCATGTGCCTTTGATGG	60.089
CL10445.Contig1	TCATCATCATCATCA	TCA(3*5)	TCGTCACTGTACTCGTGACAATCTCCACCAAAGACAGAACTTTCAGATTTCTCATCAACGGAGAATTCATCACAACCACTGTTAGTACCC[TCATCATCATCATCA]CCATGAGAGTCATTATCTTCATCATCAGCATCCTCAT	TCGTCACTGTACTCGTGACAATC	60.23	ATGAGGATGCTGATGATGAAGAT	59.946
CL10484.Contig1	ATCATCATCATCATC	ATC(3*5)	GATCAGCAATTATGGGGTCATTATTAGTATTATTATTGTTATAAATATTTGCTGTATTTAATTTGTAGCAGCAGCTGT[ATCATCATCATCATC]AACTAACGATCCAGAGCTTCATTTGT	GATCAGCAATTATGGGGTCATTA	60.055	ACAAATGAAGCTCTGGATCGTTA	60.143
CL10501.Contig1	TTCTTCTTCTTCTTC	TTC(3*5)	ACGACAGAGAGTCTTCTTGCCTTGGCACTGGCATTGAATTCCAGCACCAA[TTCTTCTTCTTCTTC]TATTTACACAGACGTCGGCGGGGTAACCGACGATGCCGCTGATCAGCAGGGGACGGTCAGACTCAGTGATGTGGATTTG	ACGACAGAGAGTCTTCTTGCCTT	60.953	CAAATCCACATCACTGAGTCTGA	60.164
CL1058.Contig3	GAGGAGGAGGAGGAG	GAG(3*5)	ATTGCAGTGTAAGGAGATTGCATTGGATTTC[GAGGAGGAGGAGGAG]GCATTGGATGCAGAAAGAAAGAATGCTTGTGTAAAGGATCTCCGAAGTTTGAGCAGTCTCAGGGTTTTGGAAGTCGGAATAAAATCGGCACTTAAGGAGG	ATTGCAGTGTAAGGAGATTGCAT	60.041	CCTCCTTAAGTGCCGATTTTATT	59.887
CL10609.Contig1	ATTTTTATTTTTATTTTTATTTTT	ATTTTT(6*4)	TTCTTAGTTGGGTTGAGCTTCTG[ATTTTTATTTTTATTTTTATTTTT]TGAGTATTTGCATTTGGATGAGATTTTTGTGAGGCAGAATGGGAGTGGGTGTTGTATGAAATTGATGA	TTCTTAGTTGGGTTGAGCTTCTG	59.935	TCATCAATTTCATACAACACCCA	60.103
CL10712.Contig3	ATGATGATGATGATG	ATG(3*5)	GAAAAATGATGGAGATGCTGTTCTTT[ATGATGATGATGATG]TTAAGAAGGCCAGGTACAGATGCACCACTTGCAATAAGGGTTTTCAAT	GAAAAATGATGGAGATGCTGTTC	59.965	ATTGAAAACCCTTATTGCAAGTG	59.445
CL1075.Contig1	TTATTATTATTATTA	TTA(3*5)	CTTTTGGTATCAACTGCAATCAG[TTATTATTATTATTA]TTGTTATTATTGTGCATGGCAGGAGGAATGACGATCTCTTCTC	CTTTTGGTATCAACTGCAATCAG	58.821	GAGAAGAGATCGTCATTCCTCCT	60.22
CL10774.Contig2	CTGCTGCTGCTGCTGCTGCTGCTG	CTG(3*8)	GAGGTGTCCACCATCGTTAAAGGCAAGGGAGGCGGAGGAGTCAATGCTGCCTGTGCAAGGCTTCTCTTCCT[CTGCTGCTGCTGCTGCTGCTGCTG]GGCCGCCGTCATAGGGGATGTTTGAGAGAG	GAGGTGTCCACCATCGTTAAA	59.845	CTCTCTCAAACATCCCCTATGAC	59.114
CL10779.Contig2	GCCGCCGCCGCCGCC	GCC(3*5)	GCCTCAACAATATTATCAGCGTCAAACTTATGTTGTTGACCA[GCCGCCGCCGCCGCC]TCCCCCTCGTCGTCGCCCTGTGTACCCTCCACCGGGCAACTATTATGCTAGGGATGAGTATGCG	GCCTCAACAATATTATCAGCGTC	60.009	CGCATACTCATCCCTAGCATAAT	59.537
CL10954.Contig1	TCTCTCTCTCTC	TC(2*6)	GGGAAGAGGGAAAAGGTTTAGTTATTACAGGATTACACATAACAACTCCCAATTTACGAACTACTCTTATAAAAAATCTGTATA[TCTCTCTCTCTC]CTGGAGAATCACTGTTGATAATGGG	GGGAAGAGGGAAAAGGTTTAGTT	60.212	CCCATTATCAACAGTGATTCTCC	59.717
CL1151.Contig4	CTTCTTCTTCTTCTT	CTT(3*5)	ATTGAGGAGTTCCCACTCTTTCTTGGTGATCTTCTC[CTTCTTCTTCTTCTT]GTCCTTGTTCTTCTCTGCCTCCTCATCGACCTCCTCAATCTTGGGCTTGTCGTCCTTGGGCTCCTCCTTAGGCTTATCCTCATC	ATTGAGGAGTTCCCACTCTTTCT	59.651	GATGAGGATAAGCCTAAGGAGGA	60.069
CL1156.Contig1	TCATCATCATCATCATCATCATCA	TCA(3*8)	TTTCCAAGTTACCTTCATCTCCATCT[TCATCATCATCATCATCATCATCA]CCACTGCTAGAGTCATTAGTTTCTCCACCATTATTGTCACC	TTTCCAAGTTACCTTCATCTCCA	59.987	GGTGACAATAATGGTGGAGAAAC	59.628
CL1237.Contig2	TTATTTTATTTTATTTTATT	TTATT(5*4)	TGTATGCATGCTTTACATTGGAGGGTCACCGTGGTTGGAGTTGGACATGCTTGGTGGGCCGGAAG[TTATTTTATTTTATTTTATT]TTTATGTAATTTGGATGTGTGGTTAAGTCGCTTGAAAGGGCAATGCTTACCACACTTGCTAACTTG	TGTATGCATGCTTTACATTGGAG	60.034	CAAGTTAGCAAGTGTGGTAAGCA	59.517
CL1270.Contig2	ATGATGATGATGATGATG	ATG(3*6)	GATTCTTTGGCATCGATTATGTCCAGAATTTCATCTCTGGGAATA[ATGATGATGATGATGATG]TGAGGGAAGAGGAGAAGCTCATCAGCCCTGTTGCCAAGGAAGAAGTTGCTGTTAAGCC	GATTCTTTGGCATCGATTATGTC	59.827	GGCTTAACAGCAACTTCTTCCTT	60.293
CL1270.Contig3	ATGATGATGATGATG	ATG(3*5)	GATTCTTTGGCATCGATTATGTCCAGAATTTCATCACTGGGGGCA[ATGATGATGATGATG]TGAGGGAAGACGAGAAACCGATTAGCCCTGTTCCCAAGGAAGCAGATGCAGTTAAGC	GATTCTTTGGCATCGATTATGTC	59.827	GCTTAACTGCATCTGCTTCCTT	60.048
CL1509.Contig1	GCTGCTGCTGCTGCT	GCT(3*5)	CTTGGTTTGCATTTCTCTGAAGTA[GCTGCTGCTGCTGCT]GTTGCTGCAATTGTTGCTGTGTACCACCTCGCCTTCCACCTATCCGTTGTCCTTGTTGACCTTGTCTC	CTTGGTTTGCATTTCTCTGAAGT	59.812	GAGACAAGGTCAACAAGGACAAC	60.067
CL1565.Contig8	GCAGCAGCAGCAGCA	GCA(3*5)	AACCAAATCCAATACAGCAAGAGCTGCAAACGCTTCAGACAACTGGTGGTTTGTT[GCAGCAGCAGCAGCA]ACCGAGCTCTATTGAACAACAAAAGCAGCTATTACAACCGCGCGGTCTGCCAGAGGGCTCTTCAACATCAATGGAATCATCAGGTC	AACCAAATCCAATACAGCAAGAG	59.552	GACCTGATGATTCCATTGATGTT	60.074
CL1584.Contig1	ATATATATATATATATAT	AT(2*9)	GGTAGGAATATTCGTGTCAAGC[ATATATATATATATATAT]CTCCATTGAGTGCATGTGAATGTAGGGTATTAGAACATATTAGATGAGTGCATGTGAATGTAGG	GGTAGGAATATTCGTGTCAAGCA	60.377	CCTACATTCACATGCACTCATCT	59.139
CL1598.Contig2	GAGAGAGAGAGA	GA(2*6)	GATGAGGAGATCTTCTAGGCCACGCAAGTCAATCTTTACTTCTGCAGTTGCAGCTTCAAATTCAACAGCTTCCGGCTTCACATGTGT[GAGAGAGAGAGA]CCCATTTCAGCGCAGTAGAGAAGAGA	GATGAGGAGATCTTCTAGGCCAC	60.589	TCTCTTCTCTACTGCGCTGAAAT	59.818
CL1598.Contig6	TCTCTCTCTCTCTCTC	TC(2*8)	CAAAGTGTTGACTTCTGTTGTAAATGTACTA[TCTCTCTCTCTCTCTC]TGCTGAACTATTGAAGAACATATAAGAAGAATTGATCAAGGGTTTCCCCACATTGGGGTTTGTCCCTGGCTAGCGCCACATCTTGTGTCCTCTTGTCTTGGCTTGTCTTCTG	CAAAGTGTTGACTTCTGTTGTAAATG	59.24	CAGAAGACAAGCCAAGACAAGAG	60.585
CL161.Contig1	GGAGGAGGAGGAGGAGGAGGAGGA	GGA(3*8)	TCGGTTTCTGAATTTCTAAAGGCGGAGGGAGAGCCGGTGCCCGAGGTTAATTCAGAGGCGGCGGGAGGAGGAGGAAATAATTTCGGAGGCAGCGGC[GGAGGAGGAGGAGGAGGAGGAGGA]AGAAGAGGAGGAAGAGCCCATGACTTATGATGAGA	TCGGTTTCTGAATTTCTAAAGGC	60.898	TCTCATCATAAGTCATGGGCTCT	60.11
CL1662.Contig1	CTTCTTCTTCTTCTT	CTT(3*5)	TCTTACTGGACCTGTTATTCCGATTTGGACACTTAGTAGCATAATGCCCAAACTCATCGCAATGGAAGCAATTGATCTTACTTAGATC[CTTCTTCTTCTTCTT]ATTCTTCTCTTCTGACTAGACTCAAACTTCCCTTTTCCTTTCTTTCC	TCTTACTGGACCTGTTATTCCGA	60.008	GGAAAGAAAGGAAAAGGGAAGTT	60.311
CL1725.Contig4	CGTCGTCGTCGTCGTCGT	CGT(3*6)	GGAGCTGTGTCAGTAGGAGTTGTAGTCACCGC[CGTCGTCGTCGTCGTCGT]GACTGGAAATCAAAATAAAAATTCAAGAAACGTAACGTCTATTTCCCACCAGTGCTCGGAAGAATCAAGAACTGCAGGAAA	GGAGCTGTGTCAGTAGGAGTTGT	59.859	TTTCCTGCAGTTCTTGATTCTTC	59.885
CL174.Contig5	GATGATGATGATGAT	GAT(3*5)	CAATCATCTGAAATAACCTTCCGCGGAATTGGGATGGTTCCCGGTGAATATAGTGGCCAA[GATGATGATGATGAT]GTATTTGGCGTCGTTGATACTGAAAATGCTGTCTTGGAACGCAGTTTCAGGAGTGTGCAAATTCTTGATATGGAAGG	CAATCATCTGAAATAACCTTCCG	59.851	CCTTCCATATCAAGAATTTGCAC	59.857
CL1752.Contig1	CTCCTCCTCCTCCTC	CTC(3*5)	CTTTCTCTGCCTTGACATCCTCTCTCAT[CTCCTCCTCCTCCTC]TTCCTCCTCCACGTTAACAAGGGCGGGAGGGGTCGGAGTCGGGGTCGTCGAAGAAGAGGAATTCTTCTTCATCTTATGATCGAGGTCCTGGTGATTAGGAATGTGAG	CTTTCTCTGCCTTGACATCCTCT	61.26	CTCACATTCCTAATCACCAGGAC	59.878
CL1781.Contig1	CAGCAGCAGCAGCAGCAGCAG	CAG(3*7)	GTTGCTATCAACCTCAGACAAGCCAGACCGAATGATTGGCATGCTTTTGCCAGGGGTGGATGCGGTTATTTTCAAGCCACAACTGCCAAGCCAGCCACATCTACAACAA[CAGCAGCAGCAGCAGCAGCAG]CAACAGCAACCAAATGTACTCCAG	GTTGCTATCAACCTCAGACAAGC	60.317	CTGGAGTACATTTGGTTGCTGTT	60.45
CL180.Contig2	TGGATGTGGATGTGGATGTGGATG	TGGATG(6*4)	GAGTATTGTTGGTCCACCTTCTGCTTTCCAAGCATTACAACAC[TGGATGTGGATGTGGATGTGGATG]GGGCGGCCTTGTTGTTAGAGTGGGTGCCCTCGTACTTGTGCGTGGTCTTCCACCAAGTGGAGGCGGAGGGCTGATTTGCTTTTCCCTCTGAC	GAGTATTGTTGGTCCACCTTCTG	59.914	GTCAGAGGGAAAAGCAAATCAG	60.242
CL180.Contig2	CAGCAGCAGCAGCAG	CAG(3*5)	AAGCAGAAAGTTTCCTGGACTGTCCAC[CAGCAGCAGCAGCAG]ATGCCCACAATACCGCCATACAAAACACGCCCATCTGCAGGATCACAGTGAGTCGAAGCCGCGAACCACAAGCAGCCATTTGAATTTTGAAGGCAAGCTGGTAAAATACCT	AAGCAGAAAGTTTCCTGGACTGT	60.678	AGGTATTTTACCAGCTTGCCTTC	60.039
CL1875.Contig1	ATGATGATGATGATG	ATG(3*5)	AAAGAATTGATCCCCTTTCTGAGTGAAAACA[ATGATGATGATGATG]AGGTTTTGCTTGCCATGGCAGAAGAATTGGGAGTTTTCATTCCAT	AAAGAATTGATCCCCTTTCTGAG	59.958	ATGGAATGAAAACTCCCAATTCT	60.069
CL1875.Contig2	ATGATGATGATGATG	ATG(3*5)	ATCCCATTCTTGAGTGAGAACA[ATGATGATGATGATG]AGGTTTTGCTTGTAATGGCAGAAGAATTGGGGGTTTTTATTCCTTATGTTGGC	ATCCCATTCTTGAGTGAGAACAA	59.99	GCCAACATAAGGAATAAAAACCC	59.972
CL1887.Contig2	TTCTTCTTCTTCTTC	TTC(3*5)	TTGAATAAGTTAAACGTCACGCCGGGTTCATCGCGAGACTTGCGCTTCGCT[TTCTTCTTCTTCTTC]TGGCCGTGCCCCTCTTCTTCGTCGCCGTTGGATTGCGGAACTTCTGTTCCTTTCAAATCTTCCTTAGATTTCTGATTCTCGAACTTGGC	TTGAATAAGTTAAACGTCACGCC	60.398	GCCAAGTTCGAGAATCAGAAAT	59.731
CL1925.Contig1	TTCTTCTTCTTCTTC	TTC(3*5)	TCTCCCTTCTTCGTCTTCTTCTTTTTCTTCTTCTTGCCATTCTCTTCTGCCTCGCCAGCCTCTCCAACTTCAGGTGCATCTACGTCCATTTGATCCTTATGCTTCTTTGCT[TTCTTCTTCTTCTTC]TCAACTTCTACTTCAGGCAAGTCACCATTTT	TCTCCCTTCTTCGTCTTCTTCTT	60.009	AAAATGGTGACTTGCCTGAAGTA	60.048
CL2132.Contig1	CTGCTGCTGCTGCTG	CTG(3*5)	CTAGGCCCTGTGTTGAGAGAACTTCCATAAGACTGCACTGCTTGGGCTTGTGGTGGAGGTTGAGCCTGAGGAGCAGACTGCATTGGCACTGCAGCCCA[CTGCTGCTGCTGCTG]AGCACTGGCATTTGCATCTATGAGTT	CTAGGCCCTGTGTTGAGAGAACT	61.177	AACTCATAGATGCAAATGCCAGT	60.041
CL2180.Contig2	GAAGAAGAAGAAGAA	GAA(3*5)	AGCTACTGGTAGAGCTTTCAGGCTTTGCAGGAAACAAGAAGAGCCTCAGCCTCGACGATGACGAT[GAAGAAGAAGAAGAA]GACTTGCTGCTGTTAATTGCCCCCGGGGACTGCTGCAATCGATCGTATTCTTCCAACATATTTTCAAGATCTTCGTCCG	AGCTACTGGTAGAGCTTTCAGGC	60.564	CGGACGAAGATCTTGAAAATATG	59.977
CL2210.Contig5	GAGGAGGAGGAGGAGGAG	GAG(3*6)	CCTCCAGGTTTGTGCACTATAAGCGTGTTGAGCGAATTGTGCAGAAGGCTTCGGGGGAGAAGCTCCATGAAGATGACGAA[GAGGAGGAGGAGGAGGAG]GAAGAAATGGCTTCTGAGGATGATGGTGTGGATAGCATCTGTGAAGCAG	CCTCCAGGTTTGTGCACTATAAG	60.062	CTGCTTCACAGATGCTATCCAC	59.904
CL2225.Contig3	AAGAAGAAGAAGAAG	AAG(3*5)	TATCGATTGCTCTCTCGATCTCTCCGACCGC[AAGAAGAAGAAGAAG]AAAGCACAGAAAGAGGGCGAGGAGAAAGAGAAGCCATCCGATCCGAGCAAGACCAAGGAAAACGAGTCGACAGAGGAGAGCAAAGTAACCCT	TATCGATTGCTCTCTCGATCTCT	59.612	AGGGTTACTTTGCTCTCCTCTGT	59.836
CL2321.Contig1	TCTTCTTCTTCTTCT	TCT(3*5)	TAGCCCAGAAACTGTAGAAACCATAATGAAAGAGAGAGAAAGAGGCCCAAAAACTTCGATATTGA[TCTTCTTCTTCTTCT]TCGTCCTTTTCCAACTTCTATCTTGAGAAGGTCGAACTTTCTTGAGTGAGTGTGCAAATG	TAGCCCAGAAACTGTAGAAACCA	60.169	CATTTGCACACTCACTCAAGAAA	60.332
CL2352.Contig3	AAGAAGAAGAAGAAG	AAG(3*5)	AGGAGGAAGACACAGCAATGTTAACTGAAGAAACACCA[AAGAAGAAGAAGAAG]AAAGACAAGAGCAAGACATCCACTTAATGGATCTCAAAATTACCTCAGTAGTTTTTGAGGTTGCCAC	AGGAGGAAGACACAGCAATGTTA	60.178	GTGGCAACCTCAAAAACTACTGA	60.558
CL2382.Contig1	TGATGATGATGATGATGA	TGA(3*6)	CAATGGAAAGACATGGAAAGAGAT[TGATGATGATGATGATGA]TTCCCAGGGTGTGGATTTGATCAAAGGTTACTTGTCAAAAATACAAGAGCTGGAAAATGAAGTGCAACGGTTACAAGCTTCAGTGAATTCTCAACCTACCAGG	CAATGGAAAGACATGGAAAGAGA	60.469	CCTGGTAGGTTGAGAATTCACTG	60.04
CL2385.Contig1	CCTTCCCTTCCCTTCCCTTC	CCTTC(5*4)	AGATTATAAGCTGCGTGTGGTGTGGAGGACTTAAGGAGGAATCCTTTTCCCATCATTTTAG[CCTTCCCTTCCCTTCCCTTC]CCAGGTGCCACAATTATCTCACCATCTTTGTAAATTATCTTACAGGTCGAGGTCGATTAA	AGATTATAAGCTGCGTGTGGTGT	60.095	TTAATCGACCTCGACCTGTAAGA	60.136
CL2435.Contig1	ATATATATATATATAT	AT(2*8)	GGCTATGACTAGACCATCACCAGAGACGGAGACAAGCAATTTCTCATCTAATGTTCCAAGGGTTTTCAAAACAAATATGTATCTAGATGCGAGTTC[ATATATATATATATAT]TGAACATGGAAAATGCCCTTTGATGCTTCTACATGCGAACTAA	GGCTATGACTAGACCATCACCAG	60.033	TTAGTTCGCATGTAGAAGCATCA	59.924
CL2489.Contig3	GAAGAAGAAGAAGAA	GAA(3*5)	ACGAACTTCAATTGCCTATTCCTGAGGATG[GAAGAAGAAGAAGAA]GCGAAGGGAAGAAGAGATTTGATATCGCTGCTCCTTGCTCTGCCATGACATGTTTGCCCAAAGGGAATCCGCATTAAGCATTCCATCTTAAC	ACGAACTTCAATTGCCTATTCCT	60.365	GTTAAGATGGAATGCTTAATGCG	60.006
CL2510.Contig2	GCTGCTGCTGCTGCTGCT	GCT(3*6)	GGATTGCTGAGATACTTGTGGAGAAGCAGCCTGGAGAAGTTGAGGTGAAGAAACAGAAAGTGCTGACCCTGTCTTAA[GCTGCTGCTGCTGCTGCT]GATAAACTGAACGCTGACTTAAATGTTGCTGT	GGATTGCTGAGATACTTGTGGAG	60.144	ACAGCAACATTTAAGTCAGCGTT	60.235
CL2510.Contig3	GCTGCTGCTGCTGCT	GCT(3*5)	CAAGTTGATCTATCTGTGGGGAGGATTGCTGAGAGACTTGTGGAGAAGCAGCCTGGAGAAGTTGAGGTGAAGAAACAGGAAGTGCTGACGCTGTCTTAA[GCTGCTGCTGCTGCT]GATAAACTGAACGCTGACTTAACGGATGATGTTGCTA	CAAGTTGATCTATCTGTGGGGAG	60.005	TAGCAACATCATCCGTTAAGTCA	59.661
CL2545.Contig1	GCGGCGGCGGCGGCG	GCG(3*5)	TTGTTTCTTAGGGTTTGCAGAAATGCATCTGGAATTGACCCTAGCGGCGGAGGAGATAGTGGTGGATGTGGCT[GCGGCGGCGGCGGCG]GAGGATGAGGAGGAGCAGTTCGAGCGCCTCTCGGACGCGGTGGTGCTGTGCATATTGAACAGAGTGGGGGAC	TTGTTTCTTAGGGTTTGCAGAAA	60.147	GTCCCCCACTCTGTTCAATATG	60.61
CL2545.Contig1	GGCGGCGGCGGCGGCGGC	GGC(3*6)	TGCATCATCTTATTGTGAATCCCAAGAA[GGCGGCGGCGGCGGCGGC]TCTGGATGAGGTTTCTCATCATTCGCCCAGCGAGGTTCTGAGGAATTTTAAGG	TGCATCATCTTATTGTGAATCCC	61.054	CCTTAAAATTCCTCAGAACCTCG	60.452
CL2569.Contig2	CTCCTGCTCCTGCTCCTGCTCCTG	CTCCTG(6*4)	ATTATCTCAGCCCAAAATGTTCAAACATTTTTTCCTGTCACAAAGGTCCTTC[CTCCTGCTCCTGCTCCTGCTCCTG]TTCCTGCTTCTGAAAATCAGTCCGTATCCAGCATGCCAACAGATCGAAACCAGAGCTTATCAGTG	ATTATCTCAGCCCAAAATGTTCA	59.857	CACTGATAAGCTCTGGTTTCGAT	59.797
CL2609.Contig1	GGTGGTGGTGGTGGT	GGT(3*5)	CGGATGAACAATAGGAGTATCCGCCGCACTCGACGGGCGAGGGGCTCGGCGGAGGTGGTGGCGGCGGTGGTGGCGGAGTAGAAGGC[GGTGGTGGTGGTGGT]GTCGAGGAAGGGGATGGTTCGGGACTGGGCGAGGTTTCCTCCTTGGTGGGATAG	CGGATGAACAATAGGAGTATCCG	61.86	CTATCCCACCAAGGAGGAAAC	59.813
CL2690.Contig1	TCTTCTTCTTCTTCT	TCT(3*5)	TCTTATCCAGATAGGCCTTAGCCACCCTGAGGCGCTTTTCATCTGCGGTTTCCCTCTCTTCCTCTGGAATTTCC[TCTTCTTCTTCTTCT]GCTGGAGCATGTCTGCCAATAGCGTCATCGTCTTCTTCACTGCTGAAAATCTCTTCTCCTTTG	TCTTATCCAGATAGGCCTTAGCC	60.089	CAAAGGAGAAGAGATTTTCAGCA	60.008
CL2715.Contig2	GGAGGAGGAGGAGGA	GGA(3*5)	CGAGATCTTGATTAACGTTCCACTCTGCAGCGAGGGCAACCTCGGCGGAGGCCGCCTCTCGGCGCAAAGAAGG[GGAGGAGGAGGAGGA]TGAGGCCTTAGCGACCAAATCCGTGGAGGATGCGCCTGACTGGCAGCATATCGTCGTTTCTTTCGAAGT	CGAGATCTTGATTAACGTTCCAC	60.014	ACTTCGAAAGAAACGACGATATG	59.68
CL2745.Contig1	AAATAAATAAATAAATAAAT	AAAT(4*5)	TGTAAGTGTTGAGGAAATTGACAATGTTTAAAACATATAAAGCATTTCCAATATGAAAAGTTAGATTTGATCGGTAGTGGATCTATACAA[AAATAAATAAATAAATAAAT]CCTTTGTGAATATTTAAATGGAAAACAAATAAACCATGTCT	TGTAAGTGTTGAGGAAATTGACA	57.351	AGACATGGTTTATTTGTTTTCCA	57.617
CL2765.Contig1	TTATTATTATTATTA	TTA(3*5)	GAACCCATCTTTCTACCAAATCCACAATAAGTGTGAAACGAATGTCCCAAAATACCCCAGGGGCATAATATTTCGTTTAATT[TTATTATTATTATTA]TGAGTATCCCAATTTATGAAGCTAAGGTAGTAGAGGGGC	GAACCCATCTTTCTACCAAATCC	60.069	GCCCCTCTACTACCTTAGCTTCA	60.274
CL2804.Contig2	GAGCCGAGCCGAGCCGAGCC	GAGCC(5*4)	GAGATACCAGGCAATGCAGATAGTGGCAATGCGGCT[GAGCCGAGCCGAGCCGAGCC]TGAGGCGAGAAGTGGTGGAGTATATGCTGGATGT	GAGATACCAGGCAATGCAGATAG	60.129	ACATCCAGCATATACTCCACCAC	60.152
CL2870.Contig2	GCCGCCGCCGCCGCCGCC	GCC(3*6)	ATGGAAAACGATAAACAAGGGTTAGAATAA[GCCGCCGCCGCCGCCGCC]TCCTTCACTCAAAGATTAATAGCAGATTCTTCAGGGAGGGAATTATGAATTGCGGAGGCCACAATTACAGTTCAAACACGGA	ATGGAAAACGATAAACAAGGGTT	60.001	TCCGTGTTTGAACTGTAATTGTG	59.949
CL2963.Contig5	TTATTATTATTATTA	TTA(3*5)	AAATTCTCCCCCTTCTTTTGAGCAATTTATTGCTGTTGCTGCTGCTGTTGTCGTTG[TTATTATTATTATTA]TATCTCCTAAATTTAAAAATTCCTCTTCAAAGCCGTGCCATTTTTGCGGACTGGCACTTTGAGGTGTTTTTA	AAATTCTCCCCCTTCTTTTGAG	59.946	TAAAAACACCTCAAAGTGCCAGT	60.082
CL3018.Contig2	GAAACGGAAACGGAAACGGAAACG	GAAACG(6*4)	TCACCCCTACGTACTGGAATAAACAGAAAACCAGATCGAAGAGGACAATAAATGACC[GAAACGGAAACGGAAACGGAAACG]GATCTTAACAATAAAGTTTCACAACGACTTAAATGCACCCTACAA	TCACCCCTACGTACTGGAATAAA	59.78	TTGTAGGGTGCATTTAAGTCGTT	59.946
CL3178.Contig2	AGAAGAAGAAGAAGA	AGA(3*5)	GGAATCATCATCATTATTGCAGGCGCTGCAGTCATCATAAGGAATAAGCTGGCGGTCGTATGAATCAGTGGCATG[AGAAGAAGAAGAAGA]CAGGACGTTGAAGGGCTTCTTAAGTTTGGGGAAGGAATGGGACAAGTGGAGGAGAGACCTAT	GGAATCATCATCATTATTGCAGG	60.53	ATAGGTCTCTCCTCCACTTGTCC	60.013
CL3203.Contig2	CACCACCACCACCAC	CAC(3*5)	ACGCCGATCTTAATTATGGATTTGAGCAGGAAATTGGATAAATTTAAACAACAGCAGGCGAATTGCCAGTCTACTTTGGCCAAGGTCGCGGCAACGAGACAGCCCCCGAAGAGTAT[CACCACCACCACCAC]TAGCAGCAGTTCAAAGAAACCTC	ACGCCGATCTTAATTATGGATTT	60.077	GAGGTTTCTTTGAACTGCTGCT	60.061
CL3249.Contig3	TATTTGTATTTGTATTTGTATTTG	TATTTG(6*4)	ATCTGTTGACATCAACCACCTCTTGCATATGGCCGATGAGTTAAAGAACAGAACTTAGACTAGTACTTGTTGCCATTA[TATTTGTATTTGTATTTGTATTTG]TTTCAGTGCTGGAGCTGGATTTTGGGCATACTCCGTATGTTGAGTTTGCCT	ATCTGTTGACATCAACCACCTCT	59.915	AGGCAAACTCAACATACGGAGTA	60.069
CL3251.Contig2	AGAGAGAGAGAG	AG(2*6)	CAATCAAGCGTGGAACTTTTAACA[AGAGAGAGAGAG]ATTTCTCAAGTAAGCCAGGGTTTTGACGAACAAAAGCATTCAAAAGCCTCCTGTGCCTTTCTGCAAACTTCATTAGGGTGATACCCTTCTCATCAACCTTTCTCT	CAATCAAGCGTGGAACTTTTAAC	60.05	AGAGAAAGGTTGATGAGAAGGGT	59.651
CL3282.Contig2	GACGACGACGACGAC	GAC(3*5)	ATCGGTTTCTTCATATTCTGCAAATAGCTAAAACCTTAGCA[GACGACGACGACGAC]GAATTTTCTCCCAGCGAGGAGCGCCTAAACCAAGTGATGAAAAGCCTG	ATCGGTTTCTTCATATTCTGCAA	59.983	CAGGCTTTTCATCACTTGGTTTA	60.506
CL3313.Contig2	ACACACACACACAC	AC(2*7)	TGGAAAGATTGAAAGAGGAACAAGAAAGCCTTCGTGCTGAGAAACCAGTCAAATCAAGCATCTTCTCTA[ACACACACACACAC]AAAATAACTCCACACCACTAAAATTTAAATCTAAACTATTCGAACACATTCAGCCCACCTGTAGATCTTT	TGGAAAGATTGAAAGAGGAACAA	60.095	AAAGATCTACAGGTGGGCTGAAT	60.373
CL3351.Contig1	TGCTGCTGCTGCTGC	TGC(3*5)	CAAATGCAGTCAGAAATTTGGTATTGCCGTGATTGCCATTGCTGGCGCTGTTGT[TGCTGCTGCTGCTGC]AGGTGTGATCCGAAGGAAATCGGTGCTTCAAACAAGTCTTCACCCCGCAAGATTTGCAAACATTTGAATTCACAAACGTTAGGGTTTCTTT	CAAATGCAGTCAGAAATTTGGTA	59.175	AAAGAAACCCTAACGTTTGTGAA	59.128
CL3361.Contig3	GAGGAGGAGGAGGAG	GAG(3*5)	ATCACATTCATCGAATTGGAATCC[GAGGAGGAGGAGGAG]TTGGGGGATTCAGTACCACATCCTGATCACCATGGTCACGATCATATGGAGCAGCAGCAGCAGAAGGCCTTGGAAGAGATTTTACAGAA	ATCACATTCATCGAATTGGAATC	60.04	TTCTGTAAAATCTCTTCCAAGGC	58.941
CL3442.Contig1	ATATATATATATAT	AT(2*7)	CCATATCCTCACGGCATTTATTACCACTGTTCATCTGATCAAGCCACACTCCGCTGCCCGCCACTAACAGGACCTGTTAAACCTGAAACTTCC[ATATATATATATAT]AGCGGACCGGATTTCTTTCCATCTGGGTAGGATTCTCTTCGAAAT	CCATATCCTCACGGCATTTATTA	60.07	ATTTCGAAGAGAATCCTACCCAG	59.978
CL3480.Contig1	GTTGTTGTTGTTGTT	GTT(3*5)	GGAACCAGTGATCCTCCATAGTTACC[GTTGTTGTTGTTGTT]AATCATTGAAGAACTGCTTTCATTAGAACCTAGGTCACTAGGGCCACTGAAAAGATTTGATCTGGGAGA	GGAACCAGTGATCCTCCATAGTT	60.6	TCTCCCAGATCAAATCTTTTCAG	59.712
CL3558.Contig4	GTGGTGGTGGTGGTG	GTG(3*5)	TACAGCAACAACAATGGTAGCAGAGAAGGAGGGCATAGCAGCAGCAACAACAACA[GTGGTGGTGGTGGTG]CAGCAACATCGTGGCCCAATGCAGGCAAAAAGATGTCTT	TACAGCAACAACAATGGTAGCAG	60.234	AAGACATCTTTTTGCCTGCATT	60.136
CL3743.Contig1	AGAGAGAGAGAGAG	AG(2*7)	ATATTCCACCATCACTTAACCCCAATGTGGGGAAACTCTTGATCAATTCTTCTTATATTCTTCAATAATTCAGC[AGAGAGAGAGAGAG]ATATTACAATTTACAGATCTGATAATTAATGACAGCGGCAAAAGAGACCTAACCAGAAAAGTCATTGCTG	ATATTCCACCATCACTTAACCCC	60.193	CAGCAATGACTTTTCTGGTTAGG	60.169
CL3743.Contig1	GAGAGAGAGAGAGAGA	GA(2*8)	AGAGATGCCTAGAAATCCGTACCCAATGAACGAG[GAGAGAGAGAGAGAGA]AGTGTGAAGATGAGTGTATCCAAATGAGGCTAAGGCATCATGTATTTATAGCAAACGTTGAGGATGAATAGAC	AGAGATGCCTAGAAATCCGTACC	60.004	GTCTATTCATCCTCAACGTTTGC	60.021
CL3750.Contig2	GCAGCAGCAGCAGCA	GCA(3*5)	GTGATTAGAGTTTTGCCTTCGTGGTGGAGTAGACGATGGATCTTCAACTTTGACAAGAGCACCACAGCCTTCAGTGCTTTCTCCCTCTTCATGACGAGCGGCC[GCAGCAGCAGCAGCA]GCTGCAGCTCCCATCCGACGACTGGGCTGAGGTTTATTAT	GTGATTAGAGTTTTGCCTTCGTG	60.176	ATAATAAACCTCAGCCCAGTCGT	60.262
CL3858.Contig1	ATATATATATATATATATAT	AT(2*10)	TGCAGAATACAGCACATCAAAATTAATTAACAGCTTCAAACCCAAGGCTCCAAATAAGTGTTCTTCTATTGAAAAAGAAGAGAAGAATCAAGGC[ATATATATATATATATATAT]TAATGCTAATGGTGGGTATTTGGTCAACTCATCCCAACTTCCTTTA	TGCAGAATACAGCACATCAAAAT	59.666	TAAAGGAAGTTGGGATGAGTTGA	59.987
CL3985.Contig1	CATCATCATCATCAT	CAT(3*5)	CAAAACATGCCCTACCTATCTCAAC[CATCATCATCATCAT]ATTCAGATACTAGACAGAAAACAGAAACAGTGACCTCATGCGGTGATTTTCAAATATACG	CAAAACATGCCCTACCTATCTCA	60.369	CGTATATTTGAAAATCACCGCAT	60.108
CL4231.Contig2	GGAGGAGGAGGAGGA	GGA(3*5)	GATTCGTGCATTAAGACTGCGGGCTTGATGCAATCCGGGATTCGCCGAGAGTGGGCGGCCACGGAGGACGGGGGACTCGGGGT[GGAGGAGGAGGAGGA]GGGATATGAATGCCCGTCCGAGTCGCAGCTGCCTCGAATCCTCTCCGTGCTCTCCTATAC	GATTCGTGCATTAAGACTGCG	60.787	GTATAGGAGAGCACGGAGAGGAT	60.129
CL4315.Contig1	AGAAGAAGAAGAAGAAGA	AGA(3*6)	GCCAAGGAGAAGTCGAGTCTAGTCAGAAAGACG[AGAAGAAGAAGAAGAAGA]ATTTGAGTAAGATCAAGTGCTTCCATTGC	GCCAAGGAGAAGTCGAGTCTAGT	60.434	GCAATGGAAGCACTTGATCTTAC	60.15
CL4382.Contig2	TATATATATATA	TA(2*6)	CGGTTCTCGCATATAAAAGCTAAATCATATATGGTAGCTGTCGCGATAATTAATCGATATATAGAACACTAGTGAGT[TATATATATATA]GATATAGATTGAGAGCATTGAGGATTGATTGGGGATAAAAATGTTGTC	CGGTTCTCGCATATAAAAGCTAA	59.804	GACAACATTTTTATCCCCAATCA	59.943
CL4419.Contig2	CACACACACACACA	CA(2*7)	TGTGTTCTGTCACAATGTTCTCCC[CACACACACACACA]TGTACACCTGTGGGTGCAGATTGCAGACACACTAGATGTCTTCATCAGTTGTTTATATGCCTCTAGTAACGCCCC	TGTGTTCTGTCACAATGTTCTCC	60.066	GGGGCGTTACTAGAGGCATATAA	60.671
CL4451.Contig1	GATGAAGATGAAGATGAAGATGAA	GATGAA(6*4)	ATCAAAGGTCTCAACTGGAATGACTAACTGCAACCGGGAATTCTCTGGCTATTCAAACTCTGATCTTGAATCAATATGGGAAGAAGAAGAT[GATGAAGATGAAGATGAAGATGAA]ATGGTTCAACTTTGTAGAAAGGCTAATCCTACTCGAGCAT	ATCAAAGGTCTCAACTGGAATGA	59.99	ATGCTCGAGTAGGATTAGCCTTT	59.804
CL4510.Contig1	TGCTGCTGCTGCTGCTGCTGC	TGC(3*7)	AAAGCAGCAGATAGCAAGAAGAAGCGCTAATGCAGCAATCCCTCCAGCAACTCCCCCAATCACAGGACCCTTACCTT[TGCTGCTGCTGCTGCTGCTGC]TAGAACTTGAAGGAGTCACATTAGAACCAGGC	AAAGCAGCAGATAGCAAGAAGAA	59.826	GCCTGGTTCTAATGTGACTCCTT	60.881
CL452.Contig1	GGCGGCGGCGGCGGC	GGC(3*5)	AAGTGTTCGTGCAGAGAGAAGACGACGGGGTGGG[GGCGGCGGCGGCGGC]AACGGGGGCAGGAGCAGAGTCTGAGTCCTCGGGATTGAGAGTGGAAAACAGACA	AAGTGTTCGTGCAGAGAGAAGAC	60.11	TGTCTGTTTTCCACTCTCAATCC	60.522
CL4544.Contig2	TATTTTATTTTATTTTATTTTATTT	TATTT(5*5)	TGCAATTGTTGCTCTATGGAAATATGACCTCTTTGAAAAGTTGAGAAAATTATTCCACAAGTAGACAAAACTAAATCTAGACA[TATTTTATTTTATTTTATTTTATTT]ATTTTTTATTAGACCACATGGTGAAAAGGCAGAAAGAACACAAGTTTTG	TGCAATTGTTGCTCTATGGAAAT	60.839	CAAAACTTGTGTTCTTTCTGCCT	59.848
CL4549.Contig1	TTCTCCTTCTCCTTCTCCTTCTCC	TTCTCC(6*4)	CCTAGTGGGACTTGAGTTTGAGATTTCTTCCTCCTTATCT[TTCTCCTTCTCCTTCTCCTTCTCC]GAATTTGTCTGACAAGTCTCTTCCCCTGATTTCCAGAATTGGTTGGGAATGGCCTCTGTAAAAGAGTT	CCTAGTGGGACTTGAGTTTGAGA	59.797	AACTCTTTTACAGAGGCCATTCC	60.018
CL4650.Contig2	AGAAGAAGAAGAAGA	AGA(3*5)	CTTAATCTTTGCTTTCAGAAGCGAAAATCAAGTAGAAGCCGAAGCAGCAGTAGC[AGAAGAAGAAGAAGA]ATCTCATGGAGTACACTGTATGATCCTGAATTGAGTGGATCAAAAG	CTTAATCTTTGCTTTCAGAAGCG	59.707	CTTTTGATCCACTCAATTCAGGA	60.469
CL4650.Contig3	ATGATGATGATGATGATG	ATG(3*6)	GCAAGTTATCACTTTCCCCTCTAAAATTATCTATGTCTAGAGACC[ATGATGATGATGATGATG]ATACTCATATGGGTCTTGGAGTAGGCAACATAATTAATGAGGAGGAGAGGCATCGCCACAGCAATTGGATACCCATTACAT	GCAAGTTATCACTTTCCCCTCTAA	60.026	ATGTAATGGGTATCCAATTGCTG	59.983
CL4727.Contig1	GCAGCAGCAGCAGCA	GCA(3*5)	TAGTAATGGTAAGGAGACGCAGGTCGCATGGAAAGGCTTCAGCGGAAATTAACAAAGTAGTATACACCCCTGATAATGATAATGAAGATGAAGAAGAATATCATG[GCAGCAGCAGCAGCA]TGACCGAACACTATTGTGAGCATGAGAATGAGAAAGA	TAGTAATGGTAAGGAGACGCAGG	59.695	TCTTTCTCATTCTCATGCTCACA	60.008
CL4727.Contig2	GCAGCAGCAGCAGCA	GCA(3*5)	TTTAGTGGATCATAACTTTCGGGGGACGCAGGTCGCATGGAAAGGCTTCAGCGGAAATTAACAAAGTAGTATACACCCCTGATAATGATAATGAAGATGAAGAAGAATATCATG[GCAGCAGCAGCAGCA]TGACCGAACACTATTGTGAGCATG	TTTAGTGGATCATAACTTTCGGG	59.403	CATGCTCACAATAGTGTTCGGT	60.059
CL4752.Contig2	TTCTTCTTCTTCTTCTTC	TTC(3*6)	CAGAAAAGCAATGAGAGAACGAGTAAACCCTCTCGGCAAAAAATGGCGCCGCGGGGTGCCGCCAACCATCCGCCGGAATCACAGCACAACCTACGCT[TTCTTCTTCTTCTTCTTC]AGGGTTTTGCCTTTCAGTCTCTTCATC	CAGAAAAGCAATGAGAGAACGAG	60.539	GATGAAGAGACTGAAAGGCAAAA	59.885
CL4794.Contig4	ATATATATATATATATAT	AT(2*9)	TGAAGCTTTAGGGTTGTCATCATTAATAATAAACTTTAGATGAATAACCGATA[ATATATATATATATATAT]TCTAGCTTTGCATGTACAGAAAATTCGTTTGGTACATTTCTGTCCCGGCGGTGGACAATGTCAAAAGCAGATATGCAC	TGAAGCTTTAGGGTTGTCATCAT	60.014	GTGCATATCTGCTTTTGACATTG	59.666
CL4812.Contig5	TCTTCTTCTTCTTCT	TCT(3*5)	GGATCCTCTCTTGTCAACATCACAAGGCAAAATAACATCCTC[TCTTCTTCTTCTTCT]CTTTAACCCTGCATTCTTGTTATCTGA	GGATCCTCTCTTGTCAACATCAC	59.994	TCAGATAACAAGAATGCAGGGTT	60.014
CL4814.Contig1	TGGTGGTGGTGGTGG	TGG(3*5)	CGGTGGAGACTTGTAGTGATAGGGAGGAGGAGGAGATGGGGA[TGGTGGTGGTGGTGG]GCGAGGGCAGTAAACCGGTGCTGGCGGAGGTGGAGGTGGTGGGCGAGGACAGTAAACCGGTGCTGGT	CGGTGGAGACTTGTAGTGATAGG	60.061	ACCAGCACCGGTTTACTGTC	60.035
CL4938.Contig5	TTCTTCTTCTTCTTC	TTC(3*5)	TCATCTACACCTTCATCACCCTCGTGTACTCCGCCGTCCAACTGATCTCCTAA[TTCTTCTTCTTCTTC]ATCTTCCTGTGCAATGTCATCCTGGTCCAGATCCATTACTGCTGCATCAACCTTTGGACCTTCGTCTTCCTCTTCTGGTTCTGATTCA	TCATCTACACCTTCATCACCCTC	60.376	TGAATCAGAACCAGAAGAGGAAG	59.872
CL5032.Contig1	TATTATTATTATTAT	TAT(3*5)	GGGTAAATTGCATTGATGTTGATAAAATTTGCAGATCATATTTGGAGTACATTCTTATCGGTTGTCTG[TATTATTATTATTAT]CAAATATTAAATTCAAAATCTGCGGTTGGGATCGCAGCAATACCCCAGTTTAACAGA	GGGTAAATTGCATTGATGTTGAT	59.969	TCTGTTAAACTGGGGTATTGCTG	60.4
CL5133.Contig1	GGTGGTGGTGGTGGT	GGT(3*5)	GGAGGAGCATCACCGTTAATCCAGCCCAGTCCAGAGGAAACGGGGGTGGTGGTGGAGGCGGTGGCTCTCGTGGCTACCGTGGGGGC[GGTGGTGGTGGTGGT]TACGGTGGAAGCCGTGATCGTGGCGAACGTGGTTATGGCGGTAGT	GGAGGAGCATCACCGTTAATC	60.841	ACTACCGCCATAACCACGTTC	61.158
CL5133.Contig1	GTGGTGGTGGTGGTGGTG	GTG(3*6)	GAACGTGGTTATGGCGGTAGTGGCGGCTACA[GTGGTGGTGGTGGTGGTG]GTTATGGTGGCGGCGGTGGCGGCTATGGTGGTGGTGGCGGTTCTCGCTATGGTGGTGGTGGTTCCGATGGTGGTAGCTGGAGGAGATAGGCAATATGATG	GAACGTGGTTATGGCGGTAGT	61.158	CATCATATTGCCTATCTCCTCCA	60.306
CL514.Contig2	TATATATATATA	TA(2*6)	GAGCCTTTTCTTTACTACTGCCTGTGTTAATATATAAAGAGAAGGACCGCG[TATATATATATA]TCTTCTTGTATTTATTTCTCTTTCAGTATTTGTATACCGTCTGTGTTAATGTACGGAGGA	GAGCCTTTTCTTTACTACTGCCTG	59.977	TCCTCCGTACATTAACACAGACG	61.3
CL514.Contig4	TATATATATATA	TA(2*6)	GAGCCTTTTCTTTACTACTGCCTGTGTTAATATATAAAGAGAAGGACCGCG[TATATATATATA]TCTTCTTGTATTTATTTCTCTTTCAGTATTTGTATACCGTCTGTGTTAATGTATGGTAAAAAAAACAAAGACGAGCCTGTATTGA	GAGCCTTTTCTTTACTACTGCCTG	59.977	TCAATACAGGCTCGTCTTTGTTT	60.176
CL5141.Contig2	ATATATATATATATAT	AT(2*8)	TACATGCAGGAGTGGATCTTTTTTCAAAAGAATAAA[ATATATATATATATAT]TCATAATAAGTGAATATACATGGTGTAGTTCTGGGAGGACTGTACTGGCCTTGACCCTCGAAAATCTGCCCAATCAAGCATCTGTAGCAATCACA	TACATGCAGGAGTGGATCTTTTT	60.014	TGTGATTGCTACAGATGCTTGAT	59.789
CL5162.Contig1	TGGTGGTGGTGGTGG	TGG(3*5)	GTAGTCAACGTTGTTCTCCTGCTCTGGGCAGTTGGC[TGGTGGTGGTGGTGG]TGTCACTGGTGGTGACGTGACTGGGATCGTACCAGACACGACACCAGTCTTGGCAACCTTGCCAGCCGTAGAAGTCTTGAGGTAG	GTAGTCAACGTTGTTCTCCTGCT	59.867	CTACCTCAAGACTTCTACGGCTG	59.611
CL5270.Contig1	CATCATCATCATCAT	CAT(3*5)	CATCTCCATGTGCTTTCATAACAGGCAATG[CATCATCATCATCAT]CAGATTCCTCACCTTCCAGGGTCCATTTCTTCCCAGCTTTAGCTTCCGATTCACCCTTATCCTCCCCTCTCTTCTCCTTCTCGCTCTCTTCCTTATT	CATCTCCATGTGCTTTCATAACA	60.011	AATAAGGAAGAGAGCGAGAAGGA	59.998
CL5301.Contig1	CTCTCTCTCTCT	CT(2*6)	AATATGCTACCCCTTGTACGGTTACTGTAGGACTACTTTGGAGAAACAACTTTGATAAAATGAACTCTCTCTCC[CTCTCTCTCTCT]GTGATAACATAGATAGCTCAATGAAGTCCAGGAG	AATATGCTACCCCTTGTACGGTT	60.039	CTCCTGGACTTCATTGAGCTATC	59.384
CL5364.Contig2	ATTATTATTATTATTATTATT	ATT(3*7)	GAGTTCGAATTCTCCGAGCTTAAGTTCGGAGACGAATGCCCACCAGTCGCCAA[ATTATTATTATTATTATTATT]AAGTGCCCTGTAATTTTCTAAAAAAGATAAAACCAAATTCCGAGCAAAATTCCCTGCTACAACAGAAACAA	GAGTTCGAATTCTCCGAGCTTA	59.987	TTGTTTCTGTTGTAGCAGGGAAT	60.048
CL5371.Contig1	GCTGCTGCTGCTGCT	GCT(3*5)	CTGTTGCTGTTGTTCTTGGTGATGGTGGTGGTGGCCCGGACCCTGGCATGGACACCGGGTTGGGATGGACCGGAACAGTGCTGCAGCAGCGGCCATGACCGTTCGGCTGCG[GCTGCTGCTGCTGCT]GCAATTGAAAGTGTTGTCGCTTCATAA	CTGTTGCTGTTGTTCTTGGTGAT	61.489	TTATGAAGCGACAACACTTTCAA	59.808
CL5418.Contig2	GACATGGACATGGACATGGACATG	GACATG(6*4)	GGTCTTCAATATTTCCTGCAGTTTCA[GACATGGACATGGACATGGACATG]GAAGATGATGTTGCAGTGCCAATATTACTAACCAATGATAGCAAGAATATCCAGACACCTGTGAGCAT	GGTCTTCAATATTTCCTGCAGTTT	59.912	ATGCTCACAGGTGTCTGGATATT	59.906
CL5501.Contig2	ACCACCACCACCACC	ACC(3*5)	AGGTAATGTGAGGCTTCAAAAGGCCAGAAAATGTCAGCAATGGCTTCAGCGGCGCTCGCAGCGTCTTCCCCCGTTGGAATCCGGGCTCCCCACATCTCTACCGTCCAACGCA[ACCACCACCACCACC]GATCGCCGCCACTGTCTTCGATCGCACTAGC	AGGTAATGTGAGGCTTCAAAAGG	60.847	GCTAGTGCGATCGAAGACAGT	59.659
CL5580.Contig2	AGCAGCAGCAGCAGCAGC	AGC(3*6)	GATTGGTATCAACAGATGCAATGGAGGAAG[AGCAGCAGCAGCAGCAGC]CAAGAAGTCCGGGGAAAAACATCAAATCTGAGT	GATTGGTATCAACAGATGCAATG	59.356	ACTCAGATTTGATGTTTTTCCCC	60.565
CL560.Contig1	AGCAGCAGCAGCAGC	AGC(3*5)	CTGTAATGGCTAGCGTTTCTGTTGCTTCTTCTACTCTGTCGACAGGT[AGCAGCAGCAGCAGC]GTGATCAGGAGGACGTCCAATCCTCATCCAAATGTCTGGGATTACGATTTTGTGCAATCTCTTCAATCCCCTTACACTGATTCTTG	CTGTAATGGCTAGCGTTTCTGTT	59.861	CAAGAATCAGTGTAAGGGGATTG	59.879
CL5732.Contig1	CTTCTTCTTCTTCTT	CTT(3*5)	GGTTTCACAGGTAACTTGTTTGCACACACAAAAGAATGAGGCAGCAGAATACATAGATAAGCACACAGATACACATATCTATAGTTC[CTTCTTCTTCTTCTT]CCCTACAGCAAACTATACAAAGAATAATAATAACAACAATGCCTCCTGCT	GGTTTCACAGGTAACTTGTTTGC	59.961	AGCAGGAGGCATTGTTGTTATTA	60.036
CL5913.Contig2	CAGCAGCAGCAGCAG	CAG(3*5)	CAGCAACAGGAATATCAATCACAATCTCAAGTCTCTTGGCAACAACTACAACAACAAATT[CAGCAGCAGCAGCAG]CAATTGACATCCCAGCAAATGGTGCTGCAGCAGCTGCAGCAAAATATTCCTCTACAGCAGTTACAGAAGCAAGTGCAACAGAA	CAGCAACAGGAATATCAATCACA	60.011	TTCTGTTGCACTTGCTTCTGTAA	60.102
CL6115.Contig2	TCCTCCTCCTCCTCCTCCTCC	TCC(3*7)	TCCATCCATGGTGTCTACTCTTCCTCT[TCCTCCTCCTCCTCCTCCTCC]AGTTGAAGGTTTCAGATCACAGCCACCTCATGTTGAAGATTTCAGATCACAGCCACTACAGCCTTTGAAAATGGAAGAA	TCCATCCATGGTGTCTACTCTTC	60.376	TTCTTCCATTTTCAAAGGCTGTA	60.115
CL6239.Contig2	CCTCCTCCTCCTCCT	CCT(3*5)	CATCTCCATTCTCAACTGGTTTGGCCACAGGAATATCGCGA[CCTCCTCCTCCTCCT]TCCAAATCCCCATCAATGCACGACGCGCATCTTCGTTCCATCCAGCCGACGCAGTCATATTTGCTGTTTGCACTGAA	CATCTCCATTCTCAACTGGTTTG	60.889	TTCAGTGCAAACAGCAAATATGA	60.664
CL6335.Contig1	ATTATTATTATTATT	ATT(3*5)	CCTTGCAGCCATTTATTATGTTCAGATTCTA[ATTATTATTATTATT]CAATTTTTTTAGTACTAAATTATATGGGTGGGTGCC	CCTTGCAGCCATTTATTATGTTC	59.884	GGCACCCACCCATATAATTTAGT	60.208
CL6351.Contig1	ATATATATATATATAT	AT(2*8)	CAAAACCCAACGAATTAAGACAGCTTTCACATTTTCTGTCAAAAGCAATGCAAC[ATATATATATATATAT]AGAATATGAAATTGAAATTATTCCAAACTTTTGCAGTCTTAGCCACAAATGAATCC	CAAAACCCAACGAATTAAGACAG	59.92	GGATTCATTTGTGGCTAAGACTG	60.014
CL6368.Contig2	TATATATATATA	TA(2*6)	TTTGAGTTCTTTGCACAGATGG[TATATATATATA]GATATATAATACTGAGATTTATGAGTCAAATATTGCATATTTTGTGTATATATTCCAACACTATAATCAGTATTTCCGCAGCCAAAGCAGCGTAATAATGCTGGCAAAAGTCACA	TTTGAGTTCTTTGCACAGATGGT	61.056	TGTGACTTTTGCCAGCATTATTA	59.674
CL6383.Contig4	AGAAGAAGAAGAAGA	AGA(3*5)	AGTCATCGGGGAATTTCTTCTT[AGAAGAAGAAGAAGA]ATCCACTTTACAGAGCAATTTCTTCGAAGAAGAGGAAGGGCAATTTCTTCAAAGAAATTAGGTTGGGATTTCGCAGATAAATAAACACTCGTTGTTTATAGAGATTTTTCGGAGTTTGGG	AGTCATCGGGGAATTTCTTCTTA	60.308	CCCAAACTCCGAAAAATCTCTAT	59.861
CL6539.Contig2	GGTTCGGTTCGGTTCGGTTC	GGTTC(5*4)	ACCCTGCAAATCAATACACAAAAGCGTCGGTGAATCAGCAGCAAGGAACCAACCCCCATATCGCCGACGCCCGCGCTGCGGTTCCTTTCGTTTCGTTTCG[GGTTCGGTTCGGTTCGGTTC]CGCCGTGTAAGATTAGTCAAAGTTTC	ACCCTGCAAATCAATACACAAAA	60.619	GAAACTTTGACTAATCTTACACGGC	59.649
CL6558.Contig2	AGAAGAAGAAGAAGAAGAAGA	AGA(3*7)	GTAGGGTGGAGAAGAAAAGGAGGCGGCGGCGGAGGAGACGGAAGAAAAAAGCGGCGGCGAACGGGGAGGTTGTGACGGGGAGGGGCGG[AGAAGAAGAAGAAGAAGAAGA]GGGGGAGCTAGGGTGCACATGCGGCAATTGGAAGGTTGGGGATTGCCATA	GTAGGGTGGAGAAGAAAAGGAGG	61.623	TATGGCAATCCCCAACCTT	60.14
CL6682.Contig1	TATATATATATATA	TA(2*7)	GCATCCACGGATGTCTCTAGTATATG[TATATATATATATA]CATATTCACAAATCCTGAGAGATTATCTCCATATTTCGACTACATAAAGTACAATGTCAAGGTGTTTGTGGA	GCATCCACGGATGTCTCTAGTAT	59.522	TCCACAAACACCTTGACATTGTA	60.311
CL6685.Contig2	ATGATGATGATGATG	ATG(3*5)	TGTCAGAGGATGAGGAACCTTTAA[ATGATGATGATGATG]ATCCAGATGACTTAGATCAAAATAGTGAGGATCTAAAAATAGATGATCTAGTTCTTGCTCAGTTTGAGAAGGTGTCACGGACCAAGAATAGATGGAAAT	TGTCAGAGGATGAGGAACCTTTA	60.116	ATTTCCATCTATTCTTGGTCCGT	60.089
CL6691.Contig2	GTGGTGGTGGTGGTG	GTG(3*5)	TTCTTGTGCACTTTCAGTTTTTGCTGGTCTGCTCGTGTCAAATTTAAATAATAATAATTTGAGAGGGAGTCGTAATATGGCAACTGTAAGCATGAACATGATCGGAAGTGGGA[GTGGTGGTGGTGGTG]GTTGTTCTCAATTTCCTGAGAGGGAG	TTCTTGTGCACTTTCAGTTTTTG	59.473	CTCCCTCTCAGGAAATTGAGAAC	60.591
CL6812.Contig1	CAGCAGCAGCAGCAG	CAG(3*5)	CACTCCATAATTCGGAAGAGGACCCGAAGAACCCGCCATGGCTCGACGACTCTGGCAGTAGTACTGTATTCATCATGTTCATATTAC[CAGCAGCAGCAGCAG]CACTCATGCTCTGAAACAACAGGT	CACTCCATAATTCGGAAGAGGAC	61.181	ACCTGTTGTTTCAGAGCATGAGT	60.224
CL692.Contig1	ATGATGATGATGATG	ATG(3*5)	TCAAAAGATCACTGGCATCTGTACCAA[ATGATGATGATGATG]AAGTTGTTGTGATTGATAAGCCTTATTGGTTTGAAAACCAGAATCGGCATTCTAAGCGAACTAAGAATAGACGGCAGATTGAAGAATCGGATCAGAATGA	TCAAAAGATCACTGGCATCTGTA	59.761	TCATTCTGATCCGATTCTTCAAT	59.923
CL693.Contig5	ATATATATATATATATATAT	AT(2*10)	TTGAGGTGATTCTATGGCACTTTGCTTATCTTATCCATGAC[ATATATATATATATATATAT]AGAGTATGGTTTATCTTTAATAGGATTTCTACCACTCCTGTTGTATGGACTAAATAATATCTATCGAGTTTGGTCGAACTTTCAGTTTCAAG	TTGAGGTGATTCTATGGCACTTT	60.014	CTTGAAACTGAAAGTTCGACCAA	60.657
CL7126.Contig1	ATATATATATAT	AT(2*6)	TATTTTCCCTAACCAGTGCTGAACAAATC[ATATATATATAT]TCCAAAATTAAAGTTTGCTAGTACTCATTGCATCCCTGCCAGAAGCTTAATGCAGTTCTGTTATCAAAAACTTGGAAAGGAAAATTCACAACAT	TATTTTCCCTAACCAGTGCTGAA	60.01	ATGTTGTGAATTTTCCTTTCCAA	59.745
CL7126.Contig1	AGAGAGAGAGAGAG	AG(2*7)	TTGCTAGTACTCATTGCATCCCTGCCAGAAGCTTAATGCAGTTCTGTTATCAAAAACTTGGAAAGGAAAATTCACAACATATCCTATAATATCCAGGCAAATTCATAAAAAT[AGAGAGAGAGAGAG]GGAGTCCAAGCTTTGTTGCAAAATTA	TTGCTAGTACTCATTGCATCCCT	60.163	TAATTTTGCAACAAAGCTTGGAC	60.501
CL7170.Contig1	GTTGTTGTTGTTGTT	GTT(3*5)	TAGCGTTAGCGTTAGCTTTCTTGTTATTACAAGG[GTTGTTGTTGTTGTT]ACGGCGCCCCCTAGGGTTACCAGAAGTTCTGTTGGGCTTTTTTTCCAAATCGCCTATGGCAACAATTGTAG	TAGCGTTAGCGTTAGCTTTCTTG	60.22	CTACAATTGTTGCCATAGGCGAT	62.34
CL7217.Contig1	ATATATATATATAT	AT(2*7)	CCAGTTTCTAAGTCCCCGTAAGTCCCCCGGTATTCTCCCAAGAACACCTGTTGAGACTATTCAAGCTGTGATTTCTCCGCCCACGCTTAA[ATATATATATATAT]TTATATATATAACCTGATTACTTTCCTGGATTAGATATAGTTTGCCTCA	CCAGTTTCTAAGTCCCCGTAAGT	59.941	TGAGGCAAACTATATCTAATCCAGG	59.906
CL7217.Contig4	ATATATATATATAT	AT(2*7)	TTGAGACTACACAAGTACGGCAGTCCTCTCCCAAGAACACCTGTTGAGACTATTCAAGCTGTGATTTCTCCGCCCACGCTTAA[ATATATATATATAT]TTATATATATAACCTGATTACTTTCCTGGATTAGATATAGTTTGCCTCA	TTGAGACTACACAAGTACGGCAG	59.497	TGAGGCAAACTATATCTAATCCAGG	59.906
CL7289.Contig2	CTCCTCCTCCTCCTC	CTC(3*5)	ACAGTCGTCTGCTCCTCAAAAAAATCCACGCAGGTCTT[CTCCTCCTCCTCCTC]ATCATGCTTCTCCTTCTTCTCTGTCTCC	ACAGTCGTCTGCTCCTCAAAA	60.043	GGAGACAGAGAAGAAGGAGAAGC	60.144
CL7456.Contig2	AGCAGCAGCAGCAGC	AGC(3*5)	AAGTTGAGACGGTTATTGTTGGAGATGACTGTGCTCTTCCTCCTCCTCGGGGCATAACTGGACGCAGAGGTCTAGCAGGCACTGTTCTTGTAGAGAAGATTGCAGG[AGCAGCAGCAGCAGC]TGGTGTTTGTCTTGTAGATGTTGCTGCAG	AAGTTGAGACGGTTATTGTTGGA	59.92	CTGCAGCAACATCTACAAGACAA	60.488
CL756.Contig2	ATATATATATATATATATATAT	AT(2*11)	CGATTAATGTTGACTGACATTGG[ATATATATATATATATATATAT]TGCAGCTCTCTTCGAATGCAGGGGCAAAGCATGATGAAGTGGATTTTGAATTTCTGGGT	CGATTAATGTTGACTGACATTGG	59.393	ACCCAGAAATTCAAAATCCACTT	60.102
CL7578.Contig4	AGAGAGAGAGAGAG	AG(2*7)	TTTGCTTCACTAATTTCCCTCTGTTCAAACTTCACACAT[AGAGAGAGAGAGAG]AACACGTTTGTCTTGGCATGATGTCTGTCATGCTTGATTCGCCATGGTTCATATGGATAGATTAGAGGTAAGAAGGCCAGCGTCCCAACAATATCCTCTATCA	TTTGCTTCACTAATTTCCCTCTG	59.78	TGATAGAGGATATTGTTGGGACG	60.21
CL7633.Contig2	TTCTTCTTCTTCTTC	TTC(3*5)	CAAGAAGCATTAAAGCCCTGATAAAATTTCTTAGATTTGATTTAGAATAATATCACTTTGACCTAGAGAAAAATGAATCTAGAGTGACACACTGA[TTCTTCTTCTTCTTC]CTTGAAGAAGGTTGCCCTACCAAATGGTTGCTTCTATTCCTGCAATAA	CAAGAAGCATTAAAGCCCTGATA	59.775	TTATTGCAGGAATAGAAGCAACC	59.657
CL7661.Contig1	CAGCAGCAGCAGCAGCAG	CAG(3*6)	TTTGGTGCTTCTAGGGTTGATAATGATGAACGGTGTGGAAATTTGGATAGATTGCAACAGAGAATCAGTGCAGCTTCCATTGCTCGTCACCAT[CAGCAGCAGCAGCAGCAG]AAAAGTTACATGAGCAGCTTGGATGCAGTTCAATCCAGAATTTT	TTTGGTGCTTCTAGGGTTGATAA	60.01	AAAATTCTGGATTGAACTGCATC	59.498
CL769.Contig1	GAGGAGGAGGAGGAG	GAG(3*5)	CCTGCGAGGGTGTTGTAATATAGAAATGGGGGAGGTGCCACATTTCGGGAATACCACGCGTTTATTCATCCCAACTGACACTTGCAAACCC[GAGGAGGAGGAGGAG]GTGGTGGAGGTGGAGGTGATAGACTTCT	CCTGCGAGGGTGTTGTAATATAG	59.926	AGAAGTCTATCACCTCCACCTCC	60.013
CL7735.Contig1	GGTGGTGGTGGTGGT	GGT(3*5)	ACGAATGACTATTGGTGCTTGTTCG[GGTGGTGGTGGTGGT]TGAATACGAACAAAGAGTGGTGGTGGAGCTGGTGCTTGAGGTGGACGAACTTCTTTGATGATC	ACGAATGACTATTGGTGCTTGTT	59.947	GATCATCAAAGAAGTTCGTCCAC	59.997
CL7739.Contig1	TTTTTGTTTTTGTTTTTGTTTTTG	TTTTTG(6*4)	TGATTTAAGGGCAATTGTAAGGAGGTGTTTTTTGCCT[TTTTTGTTTTTGTTTTTGTTTTTG]GTTAGGTTTTAAAATCAGTCTGGAGACCGCCGGGATTAGGTATGGTATTCTGAATGCTAGGGTTTGAAGATTG	TGATTTAAGGGCAATTGTAAGGA	59.858	CAATCTTCAAACCCTAGCATTCA	60.476
CL7749.Contig2	GAGGAGGAGGAGGAG	GAG(3*5)	TAAAAGTTGAAGTTATGCCAGGGGACATGGGTGAC[GAGGAGGAGGAGGAG]GACGAAGAAGATAGGGACAGTGATATCGCTTCTGTTGAACCCCATGTTTATC	TAAAAGTTGAAGTTATGCCAGGG	59.564	GATAAACATGGGGTTCAACAGAA	60.102
CL7806.Contig1	CAGCAGCAGCAGCAG	CAG(3*5)	CTGATCTCAGAGTCCATGTACGATCTTAGTCTGTATTTGTAAACTACATAAGCTC[CAGCAGCAGCAGCAG]CCAAACCTAATAATACAACCCATACAGCAGCCCAGCCAACCTTTCCCTCTTCAGCCTTTTTACCTTCACA	CTGATCTCAGAGTCCATGTACGA	59.367	TGTGAAGGTAAAAAGGCTGAAGA	60.275
CL7806.Contig2	CAGCAGCAGCAGCAG	CAG(3*5)	CTGATCTCAGAGTCCATGTACGATCTTAGTCTGTATTTGTAAACTACATAAGCTC[CAGCAGCAGCAGCAG]CCAAACCTAATAATACAACCCATACAGCAGCCCAGCCAACCTTTCCCTCTTCAGCCTTTTTACTTATGCAGG	CTGATCTCAGAGTCCATGTACGA	59.367	CCTGCATAAGTAAAAAGGCTGAA	59.809
CL7829.Contig1	ATATATATATATATATAT	AT(2*9)	TGCAGCTGTCTAACTGTAAACCACCGGAACTAGGACAGACATCGACGAAATTGAGGCGTTGCCGATCAATTTGGTGGG[ATATATATATATATATAT]AAAAAGCAAAGTGGGTTTATTCCAAGAACAAGCTT	TGCAGCTGTCTAACTGTAAACCA	59.991	AAGCTTGTTCTTGGAATAAACCC	59.9
CL7973.Contig1	CCACCACCACCACCACCACCACCACCA	CCA(3*9)	CTTCTGCACATTCACCTGTAAAATCTACATCTCCC[CCACCACCACCACCACCACCACCACCA]ATAAATAAATCCTCACCTCCTCCGCCACCACCACCAATGAAAAAATCTCCACCTCCTCCACCATCATCATACAAATCCCCATCTTC	CTTCTGCACATTCACCTGTAAAA	59.322	GAAGATGGGGATTTGTATGATGA	60.034
CL7981.Contig2	TATATATATATA	TA(2*6)	TTTTCATGTACTTGCCAATCTGAATCTATATAGTTTATC[TATATATATATA]GAAGTATATTTTGGTTTCCCTCTCTGCTGTTTAGAACAGTGCCCCCCTTTTCGCCGACCCTGTGAGAACTGACTGGATTTTGGTTTCAGA	TTTTCATGTACTTGCCAATCTGA	59.639	TCTGAAACCAAAATCCAGTCAGT	60.026
CL8043.Contig2	ATATATATATAT	AT(2*6)	TTTCTGATCTTCTCCTTGAATGCGTAC[ATATATATATAT]AGGTTTCAGATAATGTAAGCATGTTCATTCTCAGGATCGATTGGTCAATGGACCGTGGAGTTATTGAAGAGCAATGTGAACTTTATGTGGTTTGGTG	TTTCTGATCTTCTCCTTGAATGC	59.849	CACCAAACCACATAAAGTTCACA	59.815
CL8115.Contig1	CTGCTGCTGCTGCTGCTG	CTG(3*6)	GTTGGTGCACATGATATGGATCT[CTGCTGCTGCTGCTGCTG]GAGTACTGCATTATTTGAAGAAACATTGGATTGGCAGTTGAGAGGGCAAGCAGATCCCAAGAACACAACTGGTAAATTCTCGC	GTTGGTGCACATGATATGGATCT	61.012	GCGAGAATTTACCAGTTGTGTTC	60.055
CL8156.Contig2	GATGATGATGATGAT	GAT(3*5)	CAAGAGGAAACACTAGGATCTCGTGTTTCTGTATATTCTTTTAGGTCATTAGAATATGTAGTTCCAGTAGGACCAGACAGTATGGATGACATG[GATGATGATGATGAT]TCCACAGATAAGGAAAATGGCGAGGTAG	CAAGAGGAAACACTAGGATCTCG	59.42	CTACCTCGCCATTTTCCTTATCT	60.001
CL8184.Contig1	CTCCTCCTCCTCCTC	CTC(3*5)	CAGATTGCAACCACATTCTCTAACGCTCTGCAAGTATGAGCTCAAATTACAGTCAGAAAAACCAGATGA[CTCCTCCTCCTCCTC]AAGGGTATCCACCAGAAGGGCATCCTCAGGCATACCCCCCTCCTCCTCCTCCCGGGTATCCTCAACATGTTTATC	CAGATTGCAACCACATTCTCTAA	59.28	GATAAACATGTTGAGGATACCCG	59.622
CL8406.Contig2	GCAGCAGCAGCAGCA	GCA(3*5)	AGCAATACATACCCCAATCTCCTGCCTATGGAGTGCCCATTTG[GCAGCAGCAGCAGCA]ACAGGAGAGCAGGCCTCAATGGAGTACAGGGCTCTGTCACTGCGGAGCAGACATGACGACCTGCCTCCTTGGGTGTTTTTGTCCATGCTTTCTGTTT	AGCAATACATACCCCAATCTCCT	60.108	AAACAGAAAGCATGGACAAAAAC	59.573
CL8435.Contig1	ATCATCATCATCATCATC	ATC(3*6)	TAGAGGATCTTGCTTCCTCTCCTCTCAGCTTTAATCTAGATGTCTGAGGTTGTTCGTCCCCAGATTCAAAAAG[ATCATCATCATCATCATC]CAAATCCAAATCCCCAAAGTTTTTGAAACTGT	TAGAGGATCTTGCTTCCTCTCCT	59.995	ACAGTTTCAAAAACTTTGGGGAT	60.134
CL8439.Contig2	CTCTCTCTCTCT	CT(2*6)	ATCATAATCACCAAATGTACGGCTTTTCACAAACTGCTTTGCTTCTTCAAAACGAGGGTCTGGGACAAACAGTCCCTG[CTCTCTCTCTCT]CCGTAGTTTTGGTACATCATGTGC	ATCATAATCACCAAATGTACGGC	59.989	GCACATGATGTACCAAAACTACG	59.46
CL8577.Contig2	GAAGAAGAAGAAGAA	GAA(3*5)	CTGATATATGCGTTAATCCGCTCCATTTGATTCTGCACGTGTGTTCTTAGTCACGGCCGCGTCGGCAGATGAGC[GAAGAAGAAGAAGAA]GCAGGGCGTTGGATTTGAGGTAAGCGAAACACGGCCTAAATAACGCAAGGTCAAGAAGTAATTG	CTGATATATGCGTTAATCCGCTC	59.992	CAATTACTTCTTGACCTTGCGTT	59.716
CL8578.Contig2	GAAGAAGAAGAAGAA	GAA(3*5)	CGAATTCCAGTTTTTAATTGACGGTGAGTTTTGACTCAAATCAAT[GAAGAAGAAGAAGAA]TATTGCAAACAGTTTCTCGGCTCTATCGCTGGATTCAGGGGATCCGAAGGACGATGAAGATC	CGAATTCCAGTTTTTAATTGACG	59.892	GATCTTCATCGTCCTTCGGAT	60.424
CL8610.Contig4	GATGATGATGATGAT	GAT(3*5)	GCTGGACATATCTGAAGTGGAACTCAGAGGGGCCAAGGGC[GATGATGATGATGAT]GGGCAATTAGAATTTCACGTGGGACCATTCTCTGCTGCCTTCCCTCTCTCCAATTTTGATGTTTC	GCTGGACATATCTGAAGTGGAAC	60.018	GAAACATCAAAATTGGAGAGAGG	59.123
CL8686.Contig1	ATGATGATGATGATG	ATG(3*5)	GGAACGGATGCTATCCAGTACATGATGATTATT[ATGATGATGATGATG]TTGTTGATGATGACTGTGGCCTCCATAGGTGTTTCTTGTACCCGCCGAGGAAGAGCTCATGAGCAGATTACCCATGGAATTAGGGGAGATTATGTTGTGCC	GGAACGGATGCTATCCAGTACAT	61.437	GGCACAACATAATCTCCCCTAAT	60.438
CL8686.Contig1	CAGCAGCAGCAGCAG	CAG(3*5)	ATTCCATTCACAGCAAGATTCACGTTTCCGTTCCCGTTCCCACTGTACTGTATGGTATCCATCACAGACC[CAGCAGCAGCAGCAG]AAATTATCTGAGGCTTTCTTTCCTCG	ATTCCATTCACAGCAAGATTCAC	60.374	CGAGGAAAGAAAGCCTCAGATA	59.98
CL8686.Contig1	TGATGATGATGATGA	TGA(3*5)	CCACCAGGATTGTGATTATGACTCTGATGACTC[TGATGATGATGATGA]TGTTGTGAATGGTCCCAAACCCAGCTGATCTGATCACCTTGGTTCTCTGTACTTTCAGGAGG	CCACCAGGATTGTGATTATGACT	60.123	CCTCCTGAAAGTACAGAGAACCA	59.797
CL8735.Contig2	TTCTTCTTCTTCTTC	TTC(3*5)	AAGAATGTAATTCGTCTGCCAAAGAAGCAATGCCGGCGCTTTGCCGTCCCCGTCCATTTGCGGAGAAGATCTATTTGCGCAGTTAA[TTCTTCTTCTTCTTC]TGGCTCTGAATTTGAGATAATCTCCACCAGAGAGTTTTCAGATG	AAGAATGTAATTCGTCTGCCAAA	60.017	CATCTGAAAACTCTCTGGTGGAG	60.288
CL8752.Contig2	TCGTCGTCGTCGTCG	TCG(3*5)	TCTATTAAATCAACGACAGCCTGACCAGAATGCTGATACATTACCAGATTGTTACCTTCATTCTTCTCAATAATTGGATCACAGCTT[TCGTCGTCGTCGTCG]TCTTCTTCTTCTTCACTCTCGCTCTTCTCTGGCAAAGATTTTT	TCTATTAAATCAACGACAGCCTGA	60.147	AAAAATCTTTGCCAGAGAAGAGC	60.365
CL8752.Contig3	TCGTCGTCGTCGTCG	TCG(3*5)	GCATGAGAGAACCTTCATTCTTCTCAATAATTGGATCACAGCTT[TCGTCGTCGTCGTCG]TCTTCTTCTTCTTCACTCTCGCTCTTCTCTGGCAAAGATTTTTTTTCAAGGGACCGGGCCCTTGAAGCCCAATTTCTATTCGGCAACCAAAATT	GCATGAGAGAACCTTCATTCTTC	59.366	AATTTTGGTTGCCGAATAGAAAT	60.089
CL9048.Contig1	ATATATATATAT	AT(2*6)	CTGAGATTTCTTGCACTGTTCCTCACCGTTCATGCGACTGTACACGGTTTCCAGATAAACTAAA[ATATATATATAT]TATATTTCTGATCCGAAGTTGTTCTCCAGTACCATTATTTTAAGCAAACGAATAATTGTGATGGCTTCTTC	CTGAGATTTCTTGCACTGTTCCT	59.936	GAAGAAGCCATCACAATTATTCG	59.983
CL9120.Contig1	AATAATAATAATAATAAT	AAT(3*6)	TACCAAAACCTGAAACAAACCTGTTTCTGCCCTCGGTCAGCCAAGTGTGGACCAGAAAGGGGCCCAGCTTTGCATGAAAGCTAAATTTTTAAAACATCTAAACTCAAAAGCA[AATAATAATAATAATAAT]AAAAACATGAAGCTTTTACAAAATGGAGC	TACCAAAACCTGAAACAAACCTG	60.287	GCTCCATTTTGTAAAAGCTTCAT	58.875
CL9120.Contig1	GTGTGTGTGTGTGTGT	GT(2*8)	CAAAAATCCTCAGAAGTGGAGTGTCCTAAGA[GTGTGTGTGTGTGTGT]ATATATAGCATTTGTATTTCAAAAAAAACATCGATCCTAATAGTTTAGAATTGGCATCCATAGTACATTAATGATTAATCATTCAAACATCAACCATCTAGAA	CAAAAATCCTCAGAAGTGGAGTG	60.151	TTCTAGATGGTTGATGTTTGAATGA	59.891
CL9285.Contig1	CTGCTGCTGCTGCTG	CTG(3*5)	GAAGAATAGAGAGGGAACGAAGGCCATGGAAGCAGCACCTGCCTCCATTGTTGGACTGGGAGATGCTGCGGTCACCT[CTGCTGCTGCTGCTG]CTACTCCCGCTCCCACCATTATCATCACAACGGCCAAGAGAGCCGAAAATGCGTACT	GAAGAATAGAGAGGGAACGAAGG	59.749	AGTACGCATTTTCGGCTCTCT	60.407
CL9305.Contig1	CAGCAGCAGCAGCAG	CAG(3*5)	AGCTCTGCATACTCTCCACATTCAACTCACTGCCATTGTGGCAGCTTCATCAAAACGAATCAGAGTGTGAACTCAAATATA[CAGCAGCAGCAGCAG]AGAGAGCAGGAGGATTAGGATTAGGATTAGGGATTAGAAGAGAAAGGGTTGA	AGCTCTGCATACTCTCCACATTC	59.927	TCAACCCTTTCTCTTCTAATCCC	59.958
CL9421.Contig1	TGCTGCTGCTGCTGC	TGC(3*5)	AGCTGTTGAGACCTTTGAACTTGTGGTGGATGTTGCTGCATCTGG[TGCTGCTGCTGCTGC]TGTACTACAGCAAGCTGAGAAGTATCATGCTGCAGTGCCTTTGATGAAGTACTCA	AGCTGTTGAGACCTTTGAACTTG	59.971	TGAGTACTTCATCAAAGGCACTG	59.434
CL9459.Contig1	CATCACCATCACCATCACCATCAC	CATCAC(6*4)	TCATTCTCTGGGCAATATCTGTTATGTTTTTGGAGTTGATTATCATACGCAGAGCACTAGGTTCTGGTTCCTGCCCTTTCAGCAACGAGGTTTCTTCTGCAGAT[CATCACCATCACCATCACCATCAC]CACGGAGATCACAGTCATGGGGAAATTA	TCATTCTCTGGGCAATATCTGTT	59.979	TAATTTCCCCATGACTGTGATCT	59.717
CL9459.Contig2	TCACCATCACCATCACCATCACCA	TCACCA(6*4)	AGCCACAAGAAAAGCTAGAACCTTGCAACAAGCAGATAATACCCAACCTCCTGGACATAATGTTCGAAAACCAAAAGCCAGTCACCATCGC[TCACCATCACCATCACCATCACCA]CGGAGATCACAGTCATGGGGAAATTAATGGAATT	AGCCACAAGAAAAGCTAGAACCT	59.967	AATTCCATTAATTTCCCCATGAC	60.14
CL9534.Contig1	CCACCACCACCACCA	CCA(3*5)	GCAACCACTACTGGTATTTCAGCTCCTGGTGGTCCTACTAGACCACCT[CCACCACCACCACCA]CAAGGAGCACCACCTCCAAGTGGGGCTCCTTTGCCTCCACCAAGAGGTCCTATGCCCCCGATGGGTGCTCCACCACCACCTCCATCATCAATGAAT	GCAACCACTACTGGTATTTCAGC	60.075	ATTCATTGATGATGGAGGTGGT	60.452
CL9562.Contig1	GAGCAGAGCAGAGCAGAGCAGAGCA	GAGCA(5*5)	TGATCAGATACTAGTGTTTCGGGAGTCTATAATTATTGTGT[GAGCAGAGCAGAGCAGAGCAGAGCA]AACCCCGCATGGGGATTGTGTTGTTTTGCATTTTGCCAGATTCTCTTA	TGATCAGATACTAGTGTTTCGGGA	60.021	TAAGAGAATCTGGCAAAATGCAA	61.056
CL9618.Contig1	TCGTCGTCGTCGTCG	TCG(3*5)	TCTACTTCGTCGTCGTCTTCTTCA[TCGTCGTCGTCGTCG]TCATCGTCGAAATCCTCTCTGCCGTCGGTGTTGCCGGCGCTCATGCTGTCCAGCTGTGACTGGTTACCCCCAGTGAGGTTGTC	TCTACTTCGTCGTCGTCTTCTTC	60.068	GACAACCTCACTGGGGGTAAC	60.655
CL9660.Contig1	GTGTGTGTGTGT	GT(2*6)	AGGGCATATTAAACATTCCTCAATGAAGATGTATTGCTACATTAAATCATTTGTGGTGTG[GTGTGTGTGTGT]AAGTATAAGTTGCTGGAAACACCCTTC	AGGGCATATTAAACATTCCTCAA	58.936	GAAGGGTGTTTCCAGCAACTTAT	60.735
CL9660.Contig2	GTGTGTGTGTGT	GT(2*6)	TGAGGGCGTATGAAAAGATGTATTGCTACATTAAATCATTTGTGGTGTG[GTGTGTGTGTGT]AAGTATAAGTTGCTGGAAACACCCTTC	TGAGGGCGTATGAAAAGATGTAT	59.877	GAAGGGTGTTTCCAGCAACTTAT	60.735
CL9681.Contig1	CTGCTGCTGCTGCTG	CTG(3*5)	TTTACGAGAATTTTTACAGGCTGAGCATGCCGC[CTGCTGCTGCTGCTG]TTGCACTGGCCCTGCTATTCCGCCTCCCACTCCCACAATTCTGCCTGCTACCGCTCTCAGCATCGATCCTGATCCTCTCCCGATTGAAATTTCCCGATTCAATT	TTTACGAGAATTTTTACAGGCTGA	59.371	AATTGAATCGGGAAATTTCAATC	60.361
CL972.Contig1	GCTGCTGCTGCTGCT	GCT(3*5)	CTCTCCGTGAAGAAGTAAACAGG[GCTGCTGCTGCTGCT]CCAACAATGAGACAACGTATGGTATCTTTGTCAGCACGCAGATGTCAATCTGGTGGGAAGGAAATCAATGATGAAAGAAAAGCTGAAGCAGATT	CTCTCCGTGAAGAAGTAAACAGG	59.459	AATCTGCTTCAGCTTTTCTTTCA	59.68
CL981.Contig4	ATATATATATATAT	AT(2*7)	CCCTAACCAAAATCAGTTTTTCCAAATTGTCTGAATTCTTTCGA[ATATATATATATAT]TTAAGCAGAGAGAAAAGTCGATATGAGGCTGTTGAAGGTTGCCACATGCAATTTGAATCAATGGGCTATGGATTTCGAGTCCAATCTG	CCCTAACCAAAATCAGTTTTTCC	60.095	CAGATTGGACTCGAAATCCATAG	59.973
CL9855.Contig2	TATATATATATATATA	TA(2*8)	CTTCAGCAATTTCTGGGTTTATGATTAAGGACTTAAAGCTCATAAACCATTCTCATCCCCTCCACTGTATATGTTTATATACAATCTTATGTTATGTG[TATATATATATATATA]ATCTGATACATTTTGTGTCTTTGTAGGTTTCCTCTGTCCA	CTTCAGCAATTTCTGGGTTTATG	60.01	TGGACAGAGGAAACCTACAAAGA	60.151
CL988.Contig2	TGCTGCTGCTGCTGC	TGC(3*5)	CCAAAACTTGGAAATACAACTGCAATCAGTTTCCCAGAGTTCCCTGATCGTTTTGCCACTTCAAT[TGCTGCTGCTGCTGC]AGCTCCCGATGAAATTCCAACCATCAAGCCTTCCTGAAGTGCCAATTGCTTTGCCATCTCAACAGCTTCATCACTA	CCAAAACTTGGAAATACAACTGC	59.926	TAGTGATGAAGCTGTTGAGATGG	59.392
CL9903.Contig1	CTGCTGCTGCTGCTGCTG	CTG(3*6)	TTGTACTAGAAGGAAGGACGCTGATGCTGTGCCCAGGCGTAGACGTCATGGGGCAGTTGGCCGTTGGGGAGCAGATTGGGGGGAACGTTGTAGAGGGGCATGGCGGATGGATCCGGCAA[CTGCTGCTGCTGCTGCTG]CGATGCCGTCAGACCAGATGACT	TTGTACTAGAAGGAAGGACGCTG	59.955	AGTCATCTGGTCTGACGGCAT	62.059
CL991.Contig5	GGAGGAGGAGGAGGA	GGA(3*5)	AGGGTGTATGGCATCTGTGAGTGGGGAAGGGAAGAAAGGAAG[GGAGGAGGAGGAGGA]GGCGGGGTAGGGAGGAAACATCCGACGAAGAAGAGGCAGAGGGGCAGCCAGCCAACTGGTGTGGCTCTTTGGGTTTGGGCGTTGAGAAAACCAAGAATTCCT	AGGGTGTATGGCATCTGTGAGT	60.827	AGGAATTCTTGGTTTTCTCAACG	60.829
CL9937.Contig2	AGCAGCAGCAGCAGC	AGC(3*5)	GGAGATCATCATGTTGTTGGAGTTAAAAGCCCAACTCAAGAATTGTCTGCAAAATTGGAGAGCACAATTCGGCCGAACCATAATTCGAATTGTAAAGAGG[AGCAGCAGCAGCAGC]TAAGGAAATCTGTCTGGGATTGTGAGAG	GGAGATCATCATGTTGTTGGAGT	60.248	CTCTCACAATCCCAGACAGATTT	59.63
Unigene10040	TATATATATATATATA	TA(2*8)	CTTCCATGCATGCTTACAACATATGCTGCTTTTCATATGAATGTATGCTGCTAGTTAGTATCTATAATAGACCTT[TATATATATATATATA]TCGTAACATGTAAGAAAGGAAGCATGTCATTAAGATGAAGGAGG	CTTCCATGCATGCTTACAACATA	60.034	CCTCCTTCATCTTAATGACATGC	59.979
Unigene10072	AGCAGCAGCAGCAGC	AGC(3*5)	CCAAAGAATTTATTCCGCTTTCTCTTGCAGTTCGGGGATCACCTTCCGTCTTCTCTTCTCCCGGTATATCTAGT[AGCAGCAGCAGCAGC]GTTGGCAGCAATAACAATAACAGC	CCAAAGAATTTATTCCGCTTTCT	59.985	GCTGTTATTGTTATTGCTGCCA	60.157
Unigene10287	AGAAGAAGAAGAAGA	AGA(3*5)	GCACCATTAGCATTGATTTTAGCCAAAGTTTTTACAGATACTGGCGCATCCAATTCATCAGCTTGACT[AGAAGAAGAAGAAGA]GGGCAGAGAAGTCGATGCCTTCCGCAGCAGATAATCAAAGAGCCTGT	GCACCATTAGCATTGATTTTAGC	60.012	ACAGGCTCTTTGATTATCTGCTG	59.926
Unigene10291	GAAGAAGAAGAAGAA	GAA(3*5)	TCCGTTTCGTTCCATGTATGTATAGTTGAAATTCTGTTTAAATTCAGTTGGGCCCTTGCGTTTTTCTCCTTGCTTCGTGTTTGTGCGTACAGGT[GAAGAAGAAGAAGAA]GAGAGAACACACGCCAAGTTCGTTTGTTCGTCTCTCCATTTCCTCCCTTCT	TCCGTTTCGTTCCATGTATGTAT	60.484	AGAAGGGAGGAAATGGAGAGAC	60.075
Unigene10305	TATATATATATATATATA	TA(2*9)	GCCTCTCTGTATTTGTTTCCAGATGAAATTTGAAAGTTTCAGTTGAGCTTTCTGGGTTCCGGTAATACTGGCAGGTTCCTGTGTTCATTAAAGTCAAATTTAGT[TATATATATATATATATA]TTTTCAGTATGGTCAGGGTTTCTTCTG	GCCTCTCTGTATTTGTTTCCAGA	59.776	CAGAAGAAACCCTGACCATACTG	60.04
Unigene10321	GCAGCAGCAGCAGCA	GCA(3*5)	ATCCCATCCATTTCAGACCTACTCGTTTTTTTCAATTCGGT[GCAGCAGCAGCAGCA]CTAATCATGTCAGCTGCAATTTTCCGGACCAGTCCAGTGTAGTTTCATTGCCTAAGCCTGCCATTGCCACTGCTGGCTATGAAAAATGTGAAAGTGC	ATCCCATCCATTTCAGACCTACT	60.089	GCACTTTCACATTTTTCATAGCC	60.023
Unigene10345	CATCATCATCATCATCAT	CAT(3*6)	ACCTTCATCGACAGTGTTGTTCTGGGCACCCAAAGTAGCTTCAGAGGGGGAGTA[CATCATCATCATCATCAT]GGCAGAGGCAGAAGTGGACTGAGCATTTGGAGAAGTCAT	ACCTTCATCGACAGTGTTGTTCT	60.089	ATGACTTCTCCAAATGCTCAGTC	59.771
Unigene10397	AAGAAGAAGAAGAAG	AAG(3*5)	AAAGAAGAGCACGATATGAGTGGTGGGAGGAAGGGTGAAATCATGGAAGATGCAAAGAAGCCAGCAGCTGCCTCC[AAGAAGAAGAAGAAG]GTCACGTTTGCAGACCAACAGTAAATCTCAAATATTCATTCAAACCTTCCACTGATT	AAAGAAGAGCACGATATGAGTGG	59.797	AATCAGTGGAAGGTTTGAATGAA	59.864
Unigene10408	CTCCTCCTCCTCCTC	CTC(3*5)	AAAACTGCATAACTTCCTCCCTCTCCTG[CTCCTCCTCCTCCTC]CTGCTTCCTGTGCAGTGGGCGAAGCCATTGGCATCGCTACCCTGCGCCCACCGTTCTCCATATCCACCATCACGTTTTTCT	AAAACTGCATAACTTCCTCCCTC	60.018	AGAAAAACGTGATGGTGGATATG	60.122
Unigene10428	TATATATATATATA	TA(2*7)	TCAGATATGGGGTAGCGTCTTATATG[TATATATATATATA]TCAAGGTACATCTGAGAGATGGGTTTATGTCAGTAGATCATATGTATACCAAGGAGAGGCTGGTCTAGCTGTGTGTGAGCTGCTATGTTTGTACATTGATCACATGCA	TCAGATATGGGGTAGCGTCTTAT	59.051	TGCATGTGATCAATGTACAAACA	59.91
Unigene1044	ATATATATATATATATATATAT	AT(2*11)	TGAGGGTTCTACTACTGTCTCGGGAGAGAGTGGGTGCTGCGCTTCTGGCGGTTGCAAGTGTGGATCCAACTGTACCTGCGACCCTTGCAATTGCAAATGAGTAATA[ATATATATATATATATATATAT]GTTATAGAGAAGACTGGCTAGGTATGGTCG	TGAGGGTTCTACTACTGTCTCGG	59.818	CGACCATACCTAGCCAGTCTTCT	61.013
Unigene10472	TCCTCCTCCTCCTCC	TCC(3*5)	GGTGTCAAAAGCCAGTCATAGTCATTTTTCTCGCCATCTGCTATTAAGAAATCATCGGATCCTCCTCT[TCCTCCTCCTCCTCC]TGCTTTATTAGCTGCTGCAGGTATTGTTATTTTGTATATGGGGGAGCTG	GGTGTCAAAAGCCAGTCATAGTC	60.054	CAGCTCCCCCATATACAAAATAA	59.285
Unigene10472	TCTTCTTCTTCTTCT	TCT(3*5)	ATCCTCGTTGGGAAGTTTGTCCATGTCATGGAACAATGCCAGA[TCTTCTTCTTCTTCT]TGATTATGGCCATGGTCTCTCATGCTTCCAACGCTCGTGAAACTCTGGCCACGCCTGTGCTGCCCTTGCCCCTGCCACCGCTGCATTACTATTCTCTTCT	ATCCTCGTTGGGAAGTTTGTC	60.355	AGAAGAGAATAGTAATGCAGCGG	59.113
Unigene10476	ATATATATATAT	AT(2*6)	GACTGTCCCTTTGTGATAACCAGTTAAAACAAAATGACCCAGTCGGATCAAAAAAGAATATCAGGCGGGTACATGTTCCATGGATCCTTCATAGGGCCATAGAAAAATAAATAA[ATATATATATAT]AAAGGGACTTCAAGGCGTCAGTGAAAATA	GACTGTCCCTTTGTGATAACCAG	59.914	TATTTTCACTGACGCCTTGAAGT	60.176
Unigene10480	TCTCTCTCTCTC	TC(2*6)	AAGAAGTATCCGTGCAGTACGAGCCTCATGT[TCTCTCTCTCTC]GAACCATTGCGGGAAATTTTAAGCACAAGATCTAACATGTGAATCATCTCCTTTATCAGAGCTCCTGCTGTTGTCAAAGACTTCAGGTCATGTG	AAGAAGTATCCGTGCAGTACGAG	59.854	CACATGACCTGAAGTCTTTGACA	60.2
Unigene10483	AGAAGAAGAAGAAGAAGA	AGA(3*6)	GTCCAGAAAGCAATATCCAATGAGCGGCAGATCACCG[AGAAGAAGAAGAAGAAGA]AGCCAGTGGGACTCGATGCCGCGGAGGTTAAGGTCAAGCCACGCGATGCCAAGATTGCCCTGAAGTCACACGAATCGGAACCTTGTACTCAAGAATTG	GTCCAGAAAGCAATATCCAATGA	60.326	CAATTCTTGAGTACAAGGTTCCG	60.042
Unigene10669	TGGTGGTGGTGGTGG	TGG(3*5)	TATGAGGCAGAGGAATCCACTTA[TGGTGGTGGTGGTGG]AGGATCTGAATATGGGAGGCCCAAGCCTCAGTCTCAGCCTGCATATGGGTAT	TATGAGGCAGAGGAATCCACTTA	60.102	ATACCCATATGCAGGCTGAGAC	60.368
Unigene10691	CTTCTTCTTCTTCTT	CTT(3*5)	TAAGTCCCTGCGGTAATTCAACTGGCC[CTTCTTCTTCTTCTT]TGTTACCAGTATTTTCTTCGGCAAGATCAAACAAATGCCTCCCACCATTTCTAACGACATTAA	TAAGTCCCTGCGGTAATTCAACT	61.188	TTAATGTCGTTAGAAATGGTGGG	60.115
Unigene10713	AAGAAGAAGAAGAAG	AAG(3*5)	AAGTTTTGAAACGACACCCAATATCGGAGGCTGCTCTTGACTGCCCTTCATCCGCTCCTCAAACCCATTCCTGAAATGGGTTCAATGCAATCCACCCCTGAGGAGC[AAGAAGAAGAAGAAG]AAATTGAAGAAGAAGAAGTAAGGCTGCAGC	AAGTTTTGAAACGACACCCAATA	59.801	GCTGCAGCCTTACTTCTTCTTCT	60.668
Unigene10852	GAGAGAGAGAGA	GA(2*6)	GTGCTCAGATTGCTGCTATAGGTTTGGTGTGTTAGGAGTGGAAGTGATTGAATGCTTGGGGGAGTTTGTTTGTGACATTTGTGT[GAGAGAGAGAGA]GTTGTTTGTCTTGGGAGAACCATCCTCAAAGGTGAATGCTTGAGATACATGCTG	GTGCTCAGATTGCTGCTATAGGT	59.953	CAGCATGTATCTCAAGCATTCAC	59.789
Unigene1087	TTCTTCTTCTTCTTC	TTC(3*5)	TTTTCTTTTCCTTCCTACCCTTGTTTTCGATTCCATTCGCAACTTCATTTGCATTGCTGTCATCGATGATCTCCTCCTCG[TTCTTCTTCTTCTTC]TTTTTCTTCTTCTCTTTCACTTGCTGTGTATCAACAGAGACATGATTTTCTGGTTGCTC	TTTTCTTTTCCTTCCTACCCTTG	59.989	GAGCAACCAGAAAATCATGTCTC	60.131
Unigene1095	TCTCTCTCTCTC	TC(2*6)	TTGTGCATTAGACATGGGATCTTCATGTGGAGAG[TCTCTCTCTCTC]CCCCTCCAAAATATTCATTCTTTTATAATCTATTGTTCATTTCTCTATACATGATACATTGATTCAGATCTCCGTGTATATAAAAAGTGGAGGTTACAGAAATGCA	TTGTGCATTAGACATGGGATCTT	60.736	TGCATTTCTGTAACCTCCACTTT	60.048
Unigene10970	TTCTTCTTCTTCTTCTTC	TTC(3*6)	AGGAAAAATTTCTGTTGTGGTCATCATCCTCTAGCCCTTCCATGAGTTCCCTCGCATCTATCATCACGGGCAG[TTCTTCTTCTTCTTCTTC]TTTTGTTTCCTGCCTATGATCAGCGGCAGGGGCATTCTTCTGTTTATAATCTGACAGCAATCCGTTCA	AGGAAAAATTTCTGTTGTGGTCA	59.9	TGAACGGATTGCTGTCAGATTAT	60.863
Unigene10979	CTTCTTCTTCTTCTTCTTCTT	CTT(3*7)	TGAGGAAGCAGTTTTTCACTCATGC[CTTCTTCTTCTTCTTCTTCTT]CAGCATGTGAGAGGTCTGACTGATCTGCTTCAAAAAGATGAGAGTTCACATGGTCCAAGGATGAATGACCACAGTCAACATGGTGAGGACTA	TGAGGAAGCAGTTTTTCACTCAT	60.289	TAGTCCTCACCATGTTGACTGTG	60.081
Unigene10985	AGAAGAAGAAGAAGA	AGA(3*5)	GCTGGATCTGCTAATGCTAAGGTAGATAAAATGCCTGAGTTAGTTAATATGCAGGAAGATAAACTTGTGGCAGAAGGCGGGGTATCAGGGACCCCAGAAGCTGGAAAGAAAG[AGAAGAAGAAGAAGA]AAAAACATAAGGAAGATGGAAATGCC	GCTGGATCTGCTAATGCTAAGGT	61.089	GGCATTTCCATCTTCCTTATGTT	60.54
Unigene10985	AGAAGAAGAAGAAGA	AGA(3*5)	GGTAGAAGAGCAAAAGGAAGAGGAAGACGAAGAAGTGGAGAAGAGCG[AGAAGAAGAAGAAGA]AAAAGCACAAAGAGAAGGGAGAAGAGACTCCGGTGCAGGAGATACACGTCCATGAAGAGAAGG	GGTAGAAGAGCAAAAGGAAGAGG	59.908	CCTTCTCTTCATGGACGTGTATC	60.012
Unigene11049	AGGAGGAGGAGGAGG	AGG(3*5)	GTGCCCAACTTAACATAATCGA[AGGAGGAGGAGGAGG]GCAAGAAGATTCTTGCAGGAATGCTGGAGGAGGAAGAGAGGCTCGAGTGTTGAGGTATCGAGAGAA	GTGCCCAACTTAACATAATCGAA	60.245	TTCTCTCGATACCTCAACACTCG	60.797
Unigene11182	TTGTTGTTGTTGTTG	TTG(3*5)	CAGCAGTACAGGCATCTGAAGTGGCGTGGGAA[TTGTTGTTGTTGTTG]GGATTGATCGTGGTTGTCCACAAGGAAGGATTGCAGAGCTCCTCGTTGATGGAGGCAAGAATTTGATGGGCAGCTTCTACGGTTGCTTCTAAA	CAGCAGTACAGGCATCTGAAGT	59.567	TTTAGAAGCAACCGTAGAAGCTG	60.082
Unigene11388	AATCCAATCCAATCCAATCC	AATCC(5*4)	TTTGGTAGCAGAATTTGAGGGT[AATCCAATCCAATCCAATCC]AAACCCGATGGCATATAATCCCTAACACTATGTTCGCTTG	TTTGGTAGCAGAATTTGAGGGTA	60.01	CAAGCGAACATAGTGTTAGGGAT	59.573
Unigene11393	CACCACCACCACCAC	CAC(3*5)	AAGGCACCCTGATGGTACTGCCCGACCGCGGCTTCAACCCGGA[CACCACCACCACCAC]CGACTACGCCGACCGCGTCAACTTCGTCAAGGTCAC	AAGGCACCCTGATGGTACTG	59.989	GTGACCTTGACGAAGTTGACG	60.738
Unigene11432	GATTCGATTCGATTCGATTC	GATTC(5*4)	GGTGCAATCTTTACAGCATTCTTCTAAACAAGCAGACTGCAGGTGAGCTGGCAGCGCATGACTTAAAACATCCATATATTCATTCTATAATCT[GATTCGATTCGATTCGATTC]CAGATAATGACAACAATTGCCCATT	GGTGCAATCTTTACAGCATTCTT	59.685	AATGGGCAATTGTTGTCATTATC	59.969
Unigene11480	CAACAACAACAACAA	CAA(3*5)	GGATTGCCTACGAGAAAAAGAAGCGCAAGCGCCCTCCCCCACCGCAACCACCC[CAACAACAACAACAA]CTACAGCAGCAACCACCACCAGTTCAGCAGCAGCAACACCACCACCAACACCAGCACCAACACCAACAGCCTCTTCATCTCTC	GGATTGCCTACGAGAAAAAGAAG	60.579	GAGAGATGAAGAGGCTGTTGGT	59.885
Unigene11503	ATATATATATATATAT	AT(2*8)	GAACTAATTCCTTGGAAGGACCATATAAAAAGTAACAA[ATATATATATATATAT]ACAAAGTCATATTGGATATTTTCATGCATTTAGAATTTTTCC	GAACTAATTCCTTGGAAGGACCA	60.68	GGAAAAATTCTAAATGCATGAAA	57.431
Unigene11517	TTCTATTCTATTCTATTCTA	TTCTA(5*4)	ATAAACACACAAGGCCCCTAATCCTGCCCCCTCCTGCTGCTTCCTGGCTGGCTGGCTGGCTGCAGCTACCCAAAATTCTATTTTCTGCCAAT[TTCTATTCTATTCTATTCTA]CGGTAACTAACAAACCCAACCCAAACT	ATAAACACACAAGGCCCCTAATC	60.467	AGTTTGGGTTGGGTTTGTTAGTT	60.063
Unigene11517	CAACAACAACAACAA	CAA(3*5)	AACTAACAAACCCAACCCAAACTCCAACTCAAACTCAAACCCCAACCCCAAATCCAAATCCAACCCCAACACCAGCAGCACCAGTAAGAAG[CAACAACAACAACAA]CAGGCAGTCAGCAGAAGGATGTTGTTGTTGGATGT	AACTAACAAACCCAACCCAAACT	60.063	ACATCCAACAACAACATCCTTCT	59.787
Unigene11544	TCTCTCTCTCTC	TC(2*6)	GGAACTTTCATCATCTCCAAGAAAACCTGCTCACACTTGCCCAGAT[TCTCTCTCTCTC]CATTATATCCCCTGAGGAGATCCATTTCTTCTTTTGTGGGGCAAAACTTTATGAGGTTTTCTACTTGATCAATATCTAAAACTGTGTCATCCAAAGCC	GGAACTTTCATCATCTCCAAGAA	59.585	GGCTTTGGATGACACAGTTTTAG	60.048
Unigene11544	TGGTGGTGGTGGTGG	TGG(3*5)	GCTTATAAATCCTCGCCCTCTTCCCTGAGGAGGTGGTGGAGGTGTACCATTTGGAACATTTCCACCTAGCAATGGGGGTGATGGGGGAACTCCATGGCCTCTTAA[TGGTGGTGGTGGTGG]AGGAATATTACGTCCTCCAAAAGGAGG	GCTTATAAATCCTCGCCCTCTT	60.083	CCTCCTTTTGGAGGACGTAATA	59.497
Unigene11735	AATAATAATAATAATAATAAT	AAT(3*7)	GACAACAAACTAGATCCCTGTGCCAAAAAACTTAAAATTAATAAATATGGAAGAAGATACAACGATATG[AATAATAATAATAATAATAAT]AAATAACAAGCCCCCGGTAGACATATTTTTGGTAGCCTAGATACAAAAATCCTTATCACAAAACAGCG	GACAACAAACTAGATCCCTGTGC	60.054	CGCTGTTTTGTGATAAGGATTTT	59.569
Unigene11755	AAGAAGAAGAAGAAG	AAG(3*5)	ACTGATCCTTTAAATGGAGAGGCTGCAGCTTTAATGATGCGTGATAGGCAGGTCTATGAGCAGAAAGTGAAAGAATACTGTGCAAGATATGCTAAGCCGGAGGATGTTGGAAAAC[AAGAAGAAGAAGAAG]AAAGCAGTGATGAAGAAGTTAGCG	ACTGATCCTTTAAATGGAGAGGC	59.984	CGCTAACTTCTTCATCACTGCTT	60.089
Unigene11777	CTCCTCCTCCTCCTCCTCCTC	CTC(3*7)	TGTATTGAACAGGCGTTCTTCTTCATGCGTTGCATGCCTCCCTT[CTCCTCCTCCTCCTCCTCCTC]CTAGGAAGAAGAAGATTGCACCCAAGCTCTATGTCAGTGGCCTGTCTTATTATACAACAGAGCAAGGTTTGAGAAAT	TGTATTGAACAGGCGTTCTTCTT	60.176	ATTTCTCAAACCTTGCTCTGTTG	59.812
Unigene11851	GATGATGATGATGAT	GAT(3*5)	CAAGGGATCGACTCTTCTAAACAATGAAGGCATTAAAAATCAGAATTCA[GATGATGATGATGAT]CTACCAGAGTTTGACTTTACAGCAGTATCTGGAACATCTCAAACTCCAGTC	CAAGGGATCGACTCTTCTAAACA	59.77	GACTGGAGTTTGAGATGTTCCAG	60.16
Unigene11857	CAGCAGCAGCAGCAG	CAG(3*5)	GCACAGTTTTCGATAATTTCTGGGTGGATTTACATGTGGATTGTGGATAGGAATTGGAGCCT[CAGCAGCAGCAGCAG]AAGCAGGGCAGCCATCTTTTTTATTATCCCTTCCAATCCCAATTTCAATTCCCAGTCCAATTGCTTTTTCAATTC	GCACAGTTTTCGATAATTTCTGG	60.017	GAATTGAAAAAGCAATTGGACTG	59.997
Unigene11894	TCCTCCTCCTCCTCCTCC	TCC(3*6)	TTAAACAACCTGGCAAGTCAAACAACGGCAAAGGAAGGCCTATGCCTTTCTCTCTATACAAACACACATATT[TCCTCCTCCTCCTCCTCC]GTTTCGTTTCGTTTTGGCTCTCTGTTTGCTTCCGTTCAGAGGTTTGGTTGTAATAAGAGCAGCAGCAG	TTAAACAACCTGGCAAGTCAAAC	60.419	CTGCTGCTGCTCTTATTACAACC	60.446
Unigene11928	TTGCCGTTGCCGTTGCCGTTGCCG	TTGCCG(6*4)	GTACCCAGCTCTTCTGCCTTAATGATGCCGCAGGCAACGGTCTGATCTCCGATAGACCCGTTGCCA[TTGCCGTTGCCGTTGCCGTTGCCG]TTGCTCATGTGCGGAGCGAGCAACGGTGACTGTAGAAGAAGCCCGGTTAG	GTACCCAGCTCTTCTGCCTTAAT	60.16	CTAACCGGGCTTCTTCTACAGTC	60.641
Unigene11928	CCACCACCACCACCA	CCA(3*5)	TTAACAGGTTTGCAAATAGGGTCGATGTCGAGGCCGGTGCCATAAACCCC[CCACCACCACCACCA]ACAGGACGACTGAGCTCCGCCGCGGCGCTGGAACGTTCACTGGGATTGTTAGATGCGCGCATGAAGAAAGGATATGGATATGTCCCAGTCC	TTAACAGGTTTGCAAATAGGGTC	59.445	GGACTGGGACATATCCATATCCT	60.291
Unigene11942	GTTTCCGTTTCCGTTTCCGTTTCC	GTTTCC(6*4)	AGATCTGCATTTCATGGTCTGTTAATTAACAGAATTCTCGGCACCGTTTCCTTCTTCTTCGGT[GTTTCCGTTTCCGTTTCCGTTTCC]GTTAACGAATCTCTTGATCTCGCCCATGACGTTAAAAAAGAGATCTGTGTTGGGCAGAAGATAGA	AGATCTGCATTTCATGGTCTGTT	60.018	TCTATCTTCTGCCCAACACAGAT	60.144
Unigene11951	AGAAGAAGAAGAAGA	AGA(3*5)	GAAACTCAAGAAAACAATGTCGGTTGATGCGAAATCCG[AGAAGAAGAAGAAGA]AGCAACCAGCAGCTTCCGGTTCGCAGCGCGCTCACCCTACATACTTTCAGATGGC	GAAACTCAAGAAAACAATGTCGG	60.028	GCCATCTGAAAGTATGTAGGGTG	59.906
Unigene1195	TTCTTCTTCTTCTTC	TTC(3*5)	AGCTGTAATGTCTTGCAAAGGAGCACGAGGATAATCTGAGGGTAAAGGACTTCTTGAAGTAGATACCACCA[TTCTTCTTCTTCTTC]CTCTTCCGCTGCCCGGCTTTTCTGGAACAAGATTTTCCTTGTTCTGGCTGTTCTCTCTTGT	AGCTGTAATGTCTTGCAAAGGAG	59.961	ACAAGAGAGAACAGCCAGAACAA	60.462
Unigene12066	CAGGCACAGGCACAGGCACAGGCA	CAGGCA(6*4)	AGAGAGACTATGGCTGCAAATCCCAACGCAGTGGTG[CAGGCACAGGCACAGGCACAGGCA]CCTCCAGCAGCTCCCCCTCCTCAGTTGAATGCCGGATTACAGCAGCAACTGAACCTG	AGAGAGACTATGGCTGCAAATCC	61.103	CAGGTTCAGTTGCTGCTGTAAT	59.447
Unigene12067	CTCCTCCTCCTCCTC	CTC(3*5)	AACAATTTCGGTGAAATACATGGAAGCAATTACACAATTCTCTAAT[CTCCTCCTCCTCCTC]CAACCTGCTCAAACAAACAGCACATATGTGATCATCATCCTCCATCTCAGGCAATCTCTCTGCAAATTCCCCGAATGTAACTAT	AACAATTTCGGTGAAATACATGG	59.997	ATAGTTACATTCGGGGAATTTGC	60.427
Unigene12071	CAGCAGCAGCAGCAG	CAG(3*5)	ATCGAAACAGAAATTGAAGTCCAGGAGGAGAAAAACAGCAA[CAGCAGCAGCAGCAG]CCTGAGCAGCAATCCTCATCCAGAGGACCAACAACAGCCAGGTATGGAAGACACTA	ATCGAAACAGAAATTGAAGTCCA	59.994	TAGTGTCTTCCATACCTGGCTGT	60.068
Unigene12279	CTTCTTCTTCTTCTT	CTT(3*5)	CTTTCCTCTTCAGCCTTCTCTTCAACAGCAGCCGCAGCTGCTTTCTTTCCTTTCTCTTTTTC[CTTCTTCTTCTTCTT]TTTCTTTGCAGCCGCAGATTCAGCAAGCCCTTCAGGTTCAGCAGTTGCTTCCTCTGCCACTATCACTGATTCTGGAGGTTGG	CTTTCCTCTTCAGCCTTCTCTTC	60.135	CCAACCTCCAGAATCAGTGATAG	60.005
Unigene12341	ATATATATATAT	AT(2*6)	ACCTTGACAGAAACAAAAGGACAGAATTTTGTTTTAATTAAATTAATCCAATCACCCACATGCGCATATGCTCAAAACAAA[ATATATATATAT]ACAGGCAGGGATTTGCCCCTCTGCCCAGAACAAAACAACCAAAATATATGCAGGGTTTGGAG	ACCTTGACAGAAACAAAAGGACA	60.061	CTCCAAACCCTGCATATATTTTG	59.755
Unigene12493	TCTTCTTCTTCTTCT	TCT(3*5)	GCAAATAATGGATCATAGCAACCTACTAGA[TCTTCTTCTTCTTCT]TTCTTCTTCTATTTTGCTTCTGCTGCTGATGCTGATGATGATGGCGGTGGTAATTTGGATTGAGTGAG	GCAAATAATGGATCATAGCAACC	59.731	CTCACTCAATCCAAATTACCACC	59.755
Unigene12568	AGCAGCAGCAGCAGC	AGC(3*5)	CACTCATCAATTTCCCATTCATTCAAAGCCTCTGCAACCTCGGCCCCTTCCCAATTCGG[AGCAGCAGCAGCAGC]GCCAGAGCCCGGGTTCGATTCCCACAGCTCGTCCCAGGAGAAAAATTCAAGCTCGTGAGGAAG	CACTCATCAATTTCCCATTCATT	60.068	CTTCCTCACGAGCTTGAATTTTT	61.069
Unigene12571	GAAGAAGAAGAAGAA	GAA(3*5)	GTTACAGAGGTTATGGGTGATGCAATTGATGATGCTTTGGAAGGAGAT[GAAGAAGAAGAAGAA]ACAGAAGAACTTGTCAGTCAAGTTTTAGACGAGATTGGAATTGATATCGA	GTTACAGAGGTTATGGGTGATGC	59.781	TCGATATCAATTCCAATCTCGTC	60.294
Unigene12609	TATATATATATATA	TA(2*7)	TCCACAAACACCTTGACATTGTACTTTATGTAGTCGAAATATGGAGATAATCTCTCAGGATTTGTGAATATG[TATATATATATATA]CATATTCACAAATCCTGAGAGATTATCTCCATATTTCGACTACATAAAGTACAATGTCAAGGTGTTTGTGGA	TCCACAAACACCTTGACATTGTA	60.311	TCCACAAACACCTTGACATTGTA	60.311
Unigene12645	GGTGGTGGTGGTGGTGGT	GGT(3*6)	AGATGGAGGTAAACAGAGCAATGGCGGGGACGGAGGAGCGGCTGAAGGCGGTGGTGGCGAGGCTAGTGGAGGCGGCAGTGGAAAGAAGAAGAAAGGCGGAAAAGGAGGA[GGTGGTGGTGGTGGTGGT]GCGGGTGGAGGAATGATGGGCGAATCTACTAGC	AGATGGAGGTAAACAGAGCAATG	59.666	GCTAGTAGATTCGCCCATCATTC	61.27
Unigene1270	ATATATATATATATATATATAT	AT(2*11)	GTGTGCCCAACTTAACATCAAATATATAATC[ATATATATATATATATATATAT]CCTTGTTCTTGTTGCTATATAGTAATGAATAACCATGATGTCCAGACTGTTCT	GTGTGCCCAACTTAACATCAAAT	60.163	AGAACAGTCTGGACATCATGGTT	59.915
Unigene1270	GCTGCTGCTGCTGCTGCT	GCT(3*6)	CTACTTGGGCTTCTGCCATAAATGGACCAAGTTGGATGGCACTAGGGTTTTGGGACTTGCAATTGGCCTGAACTTTGATTTCCTGATCATATTCAGGAAACTCAG[GCTGCTGCTGCTGCTGCT]CATGGTCCCCTAATTCTCCACATGCCAAAGATTTA	CTACTTGGGCTTCTGCCATAAAT	60.816	TAAATCTTTGGCATGTGGAGAAT	59.857
Unigene12772	CATCATCATCATCAT	CAT(3*5)	AGAATCATCAGCAACAGCAGATTGCTCAGCAGAATCATCAACAGCAGCTTGCA[CATCATCATCATCAT]ATGCAAGCAATGGGATCTCTTCCAGTTGCCCAACATGCAGGGATCGTGGTCGAGAATGAACCACCGTTGGCTATGATTGATTCCAAGGGCAC	AGAATCATCAGCAACAGCAGATT	60.284	GTGCCCTTGGAATCAATCATAG	60.692
Unigene12914	GAGGAGGAGGAGGAG	GAG(3*5)	GTTTCTGCAAATCTGCGTCTACTGGAGGCGGAACCGGGGGAGGCGGAGCGTCCCATGGATTGAAGAAGGGCTGAGGAGGAAGGATGTGGGGGGCGATGGGGGGCGGAGACGGCGCGA[GAGGAGGAGGAGGAG]GAATGTGCTGTTGGTATGGGAG	GTTTCTGCAAATCTGCGTCTACT	59.968	CTCCCATACCAACAGCACATT	59.867
Unigene13021	TGTTCATGTTCATGTTCATGTTCA	TGTTCA(6*4)	GAGCATGCCTCTCATCTGTAAACCGCCAC[TGTTCATGTTCATGTTCATGTTCA]CAGTCCCCCGCCGGGAATCCGGTTCCACGACCATACCATCCTGCCTGCCATCGTCGGCGCTGTACATACCGCTTCTGAAATCCCTTTGAGGAGCAAGATAC	GAGCATGCCTCTCATCTGTAAAC	60.284	GTATCTTGCTCCTCAAAGGGATT	59.984
Unigene13050	TATATATATATA	TA(2*6)	GAGCTGTGTTTGAACAGGTATCCCACAATCTCCGGACATGCCATTGGAAGATG[TATATATATATA]TGGTAACATAATATAATACATACATGTCTGGTGCGG	GAGCTGTGTTTGAACAGGTATCC	60.054	CCGCACCAGACATGTATGTATTA	59.793
Unigene13062	TCTCTCTCTCTC	TC(2*6)	AGGAAGAACCTTCCCACAATTAGGACAACGCACTAATCTAACCTCAGGGGCTGGAA[TCTCTCTCTCTC]CAGACATTTTCCTTCATAGAGAAACTTGGAATGCAATAACAGATCTGATCTCGTAGTACGCCAAGGTCACTGAATGCCACACAATTAA	AGGAAGAACCTTCCCACAATTAG	59.888	TTAATTGTGTGGCATTCAGTGAC	59.919
Unigene13084	TCTTCTTCTTCTTCT	TCT(3*5)	CCTTAGCATTGCTGTACACACGCTTCCACTCTTCCAAGTTGAACTTGCTGGGGGGCAAAAAGTCCAACTTGC[TCTTCTTCTTCTTCT]CAGCAAATTCGTCTTCTTCGGGGGCATCTTCCTTATCTTCCTTCTTGGC	CCTTAGCATTGCTGTACACACG	60.739	GCCAAGAAGGAAGATAAGGAAGA	60.205
Unigene13216	AGGTAGAGGTAGAGGTAGAGGTAG	AGGTAG(6*4)	AAACAGAAGAGCTTCATGGAGAAGCAGCAAAGGATGCTGTCTCCGGGTCGCGTCTCGCCACTCGTAGAACCTGCCGCCCACGACTGCC[AGGTAGAGGTAGAGGTAGAGGTAG]AGCTACAGAATTCCCTTGACACGAAC	AAACAGAAGAGCTTCATGGAGAA	59.535	GTTCGTGTCAAGGGAATTCTGTA	60.399
Unigene13216	ACAACAACAACAACA	ACA(3*5)	GCTGCAGCAGATGATGAGACGCGAAATGGTGGTCTCTCCGCCCTTGAAATTGCGGGCGGGCTCGCCTGCTGAATGCCTCGGCGAGGGCAGTTCCGAAAAGC[ACAACAACAACAACA]CCAAGGACGTCAGGGTTACTTTAAAGGGCAT	GCTGCAGCAGATGATGAGAC	59.695	ATGCCCTTTAAAGTAACCCTGAC	59.799
Unigene13264	TATATATATATATATATATA	TA(2*10)	CGTTCTCAAACTATTTGGGTCAGAGTGATCTGTGAATATGCAACACCCAGTTGGCGATTCGAAGACGAACCTGATGATGAAATTTATG[TATATATATATATATATATA]TGTATGGGCGAGAGCAAGGAAAGAATGCATGATGAGCTTTT	CGTTCTCAAACTATTTGGGTCAG	60.042	AAAAGCTCATCATGCATTCTTTC	59.756
Unigene13283	CTGCTGCTGCTGCTG	CTG(3*5)	GTAGCAGCTATGGATGTGGTCATGGT[CTGCTGCTGCTGCTG]CAAGAACATCGATTGAATAGGAGACAACAACAGAAACCAAAAAAAAGGGGCGTTCGAGTGATCTGTTGTCTGTGCATGTGGCAGGGGGTTAGGCGACTGTAAAGGAAGTCAG	GTAGCAGCTATGGATGTGGTCAT	60.415	CTGACTTCCTTTACAGTCGCCTA	59.955
Unigene13379	TGATGATGATGATGATGA	TGA(3*6)	TTTTAAGAGGGAAAAGTGGTGGTGATGGCGG[TGATGATGATGATGATGA]TGCAGGCGAAGAAGGTGGCGATGGTGATTGCCAAGATTCTTGTTGAGGATGAGAAAGCGGTAATTTAGGCACTGATGAAG	TTTTAAGAGGGAAAAGTGGTGGT	60.248	CTTCATCAGTGCCTAAATTACCG	60.03
Unigene13398	GGAGGAGGAGGAGGAGGA	GGA(3*6)	GATAGCGAGCAAGAAGATCAAGAAACACCGGCCCTAGGT[GGAGGAGGAGGAGGAGGA]ACGGGAACGGCTTCTTTGTCCTCGCCGTCGCCTTTTCGGTCCTCCTCCTCTCCTTTCACACGTTTT	GATAGCGAGCAAGAAGATCAAGA	60.129	AAAACGTGTGAAAGGAGAGGAG	59.789
Unigene13444	CAGCAGCAGCAGCAG	CAG(3*5)	GAAGTTTTCGGAAGGAAGAAGACCTGAAGGAGGCCGCCTCGGCGGGCCTCGAGAGCATGGACCGCCTCATCAGGCTCCTGGCT[CAGCAGCAGCAGCAG]AAAGAAAGTTATAGCAACAGTCCTCCTGATGCTATG	GAAGTTTTCGGAAGGAAGAAGAC	59.769	CATAGCATCAGGAGGACTGTTG	59.757
Unigene13463	GGTGGTGGTGGTGGTGGT	GGT(3*6)	GGCATATACTGTACTGGTGGTGGA[GGTGGTGGTGGTGGTGGT]GGGGGCGGAGGATAAGGAGGTTGTTGGTGTTGCATAGGAGAAGATGCTGGATGCTGCATTGGAGATGTCTGATTCTGCACATT	GGCATATACTGTACTGGTGGTGG	60.547	AATGTGCAGAATCAGACATCTCC	60.52
Unigene13478	CTAGCCCTAGCCCTAGCCCTAGCC	CTAGCC(6*4)	TGAGTTGCATGACAAAGGTAAAAAACGGGCCCTTGGGGCTTCTGATCGAATATCTAAAAGAATTTGTT[CTAGCCCTAGCCCTAGCCCTAGCC]CCAGCCCTACCCCTAACCCAGACCCCAATACTAACC	TGAGTTGCATGACAAAGGTAAAA	59.677	GGTTAGTATTGGGGTCTGGGTTA	60.339
Unigene13486	CCTCCTCCTCCTCCT	CCT(3*5)	AATATGCCTTGCTTTGACATAGGTGCAGGTACCAAGTCCATCCGCCGCCTTCCCACTCTTTCCCTTGCCCTTCTCATCACTG[CCTCCTCCTCCTCCT]GAGGCCTTTCCCTTGCCTTTAGATGATTCTTTAGCCTTTCCGT	AATATGCCTTGCTTTGACATAGG	59.553	ACGGAAAGGCTAAAGAATCATCT	59.662
Unigene13514	CTCCTCCTCCTCCTC	CTC(3*5)	TCGTTTGCTCGTATCATACAAAACATCATCATT[CTCCTCCTCCTCCTC]CGCATTATCATAATCCCTTCCAAGCCCTGGTGTATTGCAATCCACCTGTAAAACATCATTCGTGCT	TCGTTTGCTCGTATCATACAAAA	59.674	AGCACGAATGATGTTTTACAGGT	59.947
Unigene13543	AGCAGCAGCAGCAGC	AGC(3*5)	TCTGAAGAAGCACTGCACAGATATTTTTTCATCCTCATCAGAACTCGCCATTGA[AGCAGCAGCAGCAGC]ACCATAATGACACATTCTATGGCCCTAACAGAG	TCTGAAGAAGCACTGCACAGATA	60.204	CTCTGTTAGGGCCATAGAATGTG	60.028
Unigene13550	CTGCTGCTGCTGCTG	CTG(3*5)	AAGTTCAAATAGGCTTCTGAGCACAAAAGCAAGGCGATCACAAGCAGCATCTAAAAGCGGAGCCAACCACGAACGAGCAGATGCACGCGCTATTC[CTGCTGCTGCTGCTG]TTAATCCCCCCCCACCACCTCTACCAGAATGTGCAAGCAAAATAT	AAGTTCAAATAGGCTTCTGAGCA	59.573	ATATTTTGCTTGCACATTCTGGT	59.917
Unigene13597	GACGACGACGACGAC	GAC(3*5)	GCTGTTTCTGCTGCTGCTACTAGCGCT[GACGACGACGACGAC]CACCCACCACTCCCACCCTTCAGTTTTCCGAAGTCGGGAAATTGGAATTGAGGAAATTGAGTCCCCTCACCACAACACCACCTGTGTGTAATCTGGACACGTA	GCTGTTTCTGCTGCTGCTACTA	59.99	TACGTGTCCAGATTACACACAGG	59.966
Unigene1366	TGCTGCTGCTGCTGC	TGC(3*5)	TACTTTGGGGATGAATATGCTGTTCCTGCCGCTGATGGTGGTAGTGATGTCTATTGTTCTTATTGCCGTGT[TGCTGCTGCTGCTGC]GACCCAGATGAATATGGATTGATATTTTTTCATTATGTTTTCAGATTTTGTTGTGCTTTTGACA	TACTTTGGGGATGAATATGCTGT	59.75	TGTCAAAAGCACAACAAAATCTG	60.193
Unigene1366	TCCTCCTCCTCCTCC	TCC(3*5)	GTATGGGATGACTGACTTTTTCGGTGCAGCCATGCCTCTTCAAGCTCCTCTTGGGCCAGCTGCTTCATACGACAATGGGAGCATTACTGGAAATCCAGACTA[TCCTCCTCCTCCTCC]TTCTCCGCCAAAAACCTTCTCTTGGGATTTC	GTATGGGATGACTGACTTTTTCG	59.885	GAAATCCCAAGAGAAGGTTTTTG	60.32
Unigene1374	CCTCCTCCTCCTCCT	CCT(3*5)	CACTTATAACCCCAGCTTCCTTGCGGTCCTGCTCCATGATCTGAACCCGAAGCAGAAGAAGGCCCGCCTGAGCCGGAGCTTCCC[CCTCCTCCTCCTCCT]GCGCCCGCTCCGAATTTGGACGCCATTTCTGCAAAAAATTTCTCTTCCTCTGTATGGGCC	CACTTATAACCCCAGCTTCCTTG	61.177	GGCCCATACAGAGGAAGAGAAAT	61.951
Unigene13795	ATTATTATTATTATTATT	ATT(3*6)	TTGCATCTAGTCTCTCACCGAATCCCCAAAAATGGCCGAAGGCGGCGCCATTATTGACCTCAAGATTGGCGGTACTGCTGTTGCAGCTGCTGCTCCTGCTACTCGACCTCAC[ATTATTATTATTATTATT]ATCGGTATTGTCCCAGTACTGAGCTG	TTGCATCTAGTCTCTCACCGAAT	60.276	CAGCTCAGTACTGGGACAATACC	60.068
Unigene13795	AGTAGTAGTAGTAGT	AGT(3*5)	ATTGGCAGCACTAGCAGTAGAAGTAGC[AGTAGTAGTAGTAGT]GGTACTGTTGGAATTGATAAATCCATGCTGCAGCATTGCTTGGGAATCGCTAGCAATCAAAGTGTTGTCTTCAACG	ATTGGCAGCACTAGCAGTAGAAG	60.109	CGTTGAAGACAACACTTTGATTG	59.702
Unigene13829	AGAGAGAGAGAG	AG(2*6)	TGGAGCAAAGCTGTCTCTCTATTTGAGCATGATCAGAGATTCCGTGCCATTGAGCGAGGA[AGAGAGAGAGAG]GAGCTTTTTGAGGACTATATGCTTAACATGGAACACAAGGAGCGGGATAGGGCACGTGAGCAACGGAAGAAGAATCTCAGTGAA	TGGAGCAAAGCTGTCTCTCTATT	59.688	TTCACTGAGATTCTTCTTCCGTT	59.402
Unigene1382	AAGAAGAAGAAGAAGAAG	AAG(3*6)	GGAATCACTGGAAGGGACTAAAGAGAAGATA[AAGAAGAAGAAGAAGAAG]AAAGAGAGTTCTGAGGGCAAGGATTCTGAAGATAATGATGTGCAAAAGATAAGTGCCGATAAAGGAAATAGAAGCTCAACAAAAGACAATGC	GGAATCACTGGAAGGGACTAAAG	60.347	GCATTGTCTTTTGTTGAGCTTCT	59.947
Unigene13868	AACAACAACAACAACAAC	AAC(3*6)	ACAGTAACAGTGTGATGGCTGCCTCAACGGGCTTACATACCCCGTCCTCAGCACCAGCAGCAGTAGCAGGGAGACCTGCA[AACAACAACAACAACAAC]GTGAACAACAGCACCAGCAGTAACCCTAACGCTGTGAACT	ACAGTAACAGTGTGATGGCTGC	60.245	AGTTCACAGCGTTAGGGTTACTG	59.761
Unigene13894	TGTTGTTGTTGTTGTTGT	TGT(3*6)	TGTCTGTGATAACCAGGAAGGTTTCCAGATGCTAGGATTGCACCCACTCTGATTCATCTGATCC[TGTTGTTGTTGTTGTTGT]ATGTTCTTCATACTGTTCGCATGTTCAG	TGTCTGTGATAACCAGGAAGGTT	59.914	CTGAACATGCGAACAGTATGAAG	59.821
Unigene13898	AGAGCAGAGCAGAGCAGAGC	AGAGC(5*4)	TGTACAAGCAGAGAAGCAGACAGCAGAAGAGTATAATATAAAAATCTGTATTGGAATAGT[AGAGCAGAGCAGAGCAGAGC]AGGTGATTAGAGAGAAACAGCAGCCGAAGCCGCAATGGAAGAAGAAGAGCGGCGGGATTTTCTATTCTTCTTGT	TGTACAAGCAGAGAAGCAGACAG	59.872	ACAAGAAGAATAGAAAATCCCGC	59.988
Unigene13898	AACAACAACAACAAC	AAC(3*5)	TAAAAGAAGAAGCCCTCCAAATCCGACCGATCGCTAAAAGGGACCGAT[AACAACAACAACAAC]GGCCGTGAGCTAAAAATAAACACATTCTCTAAAGCCCCGGAATCAAAACCGGCAAGCTGATGTCAACGCTCTGGGTCCCTATATTCTCCAT	TAAAAGAAGAAGCCCTCCAAATC	60.083	ATGGAGAATATAGGGACCCAGAG	59.713
Unigene13942	AGAGAGAGAGAGAG	AG(2*7)	TGGCCTGTACTTGTCTCTGAAATTTTTGGCCTCCTGCCACATGTGCGAA[AGAGAGAGAGAGAG]AAAAGAACCCACATTGTATGAACCAATCTGATGTGAGGAGAGAGAAGGATGTGTGAGTGAGTGATGTCCAAATGA	TGGCCTGTACTTGTCTCTGAAAT	60.178	TCATTTGGACATCACTCACTCAC	60.028
Unigene13964	TCGTCGTCGTCGTCG	TCG(3*5)	AAAGACGATATAGTGCTGTTGGGCGACGACACCACTGCA[TCGTCGTCGTCGTCG]TTGTCTGCGGAGGAGGGCACACGGTTCACATCGAAACCCCGGGGCGAAGACGCCGATGCGGCCCCTCCAACTTGACCACACGATCTGCTTTCTCCGTAATCTCCT	AAAGACGATATAGTGCTGTTGGG	59.573	AGGAGATTACGGAGAAAGCAGAT	59.775
Unigene13992	ATATATATATATATATAT	AT(2*9)	TACTATTCCTGGGTGCTGACATTTCTGGCGATGGGGGGTAGGAATGCAAGTTAGGCATTTATTTGGCAGTATTTTTGCGC[ATATATATATATATATAT]TGATAAGAGTCATGGACGTTGTGCACCTCATTGGGTAGCATCATTATTGGCACAGAGAT	TACTATTCCTGGGTGCTGACATT	59.906	ATCTCTGTGCCAATAATGATGCT	60.007
Unigene1401	GCAGCAGCAGCAGCA	GCA(3*5)	AGGCGCAGAAATAGATGTAGATGAAGATGAAGATAACTCGCTTTCGCCACTGTCATCATCCTCATATTCATCATCATAATCACAACTATC[GCAGCAGCAGCAGCA]ACTATCACTTGTGGAGGACTGCGCATCATCAGTGACTGGCATCTTGTTCT	AGGCGCAGAAATAGATGTAGATG	59.791	AGAACAAGATGCCAGTCACTGAT	60.189
Unigene14079	CAGCAGCAGCAGCAG	CAG(3*5)	ATTCGAACCTGTGACCTACCTCTGGCTAACGCCATGGAAGCGATTCCCAATGGCGTGCCCCCGCTTCCGCTGGCCATGCCCTTCCAACAA[CAGCAGCAGCAGCAG]CACCACATGGTCCTCACTGAGAGTAGC	ATTCGAACCTGTGACCTACCTCT	60.414	GCTACTCTCAGTGAGGACCATGT	59.821
Unigene14104	GAAGAAGAAGAAGAA	GAA(3*5)	ACACCAACAAGGACGATTATGACAATGCGGAAAAGTACTCGGACATCAAGGAGGAGGAG[GAAGAAGAAGAAGAA]TCAAGCAGCGAAGAAGAAAACGAGGAACCTCAGAGGAAGGGGTTCCTGGGAAAGGGGAGAAGTCAAGCATTAC	ACACCAACAAGGACGATTATGAC	60.165	GTAATGCTTGACTTCTCCCCTTT	60.018
Unigene14109	CTCCTCCTCCTCCTCCTC	CTC(3*6)	AATAGAGTCCTCTAATGACGCCGCCTCCAACTCTTCTTCTTCGTTCCTGGTTCTCTT[CTCCTCCTCCTCCTCCTC]CGTTTCATCGTCATCCCTTCTTCTCTTCT	AATAGAGTCCTCTAATGACGCCG	60.959	AGAAGAGAAGAAGGGATGACGAT	59.743
Unigene14128	ATATATATATAT	AT(2*6)	ACCAAATCCAAATTATGGGAATCTCATACTTCAATTTGTATCATGTTTATGTACAGTAAAGTGTGTC[ATATATATATAT]CTATCTCCAGCGGTCGTTAAAGTTACCAAAGTTGAATACATTATAATTGCAGAACTTTAATAAGCCTGTCG	ACCAAATCCAAATTATGGGAATC	60.14	CGACAGGCTTATTAAAGTTCTGC	59.486
Unigene14196	TAATAATAATAATAA	TAA(3*5)	GTTTCCAGAGAAAAAGCCTCAGTATTTTCTGCACCTGAGGTGAATGTGGAGGCCGAGGAACAGAAGGTGGG[TAATAATAATAATAA]GAAGAAGAAAGCTTTGGTGAATGAAGTTGTCAAAGAAAAAGTTGAAGAGGCTGTTGAAATAGAGCA	GTTTCCAGAGAAAAAGCCTCAGT	60.28	TGCTCTATTTCAACAGCCTCTTC	60.035
Unigene14253	TCGTCGTCGTCGTCG	TCG(3*5)	CAGGTACATGGAGAAGACCGAGCGCTGCGCCAAGTGCT[TCGTCGTCGTCGTCG]ATAAGTCCTTCGAGAAGGAGATGGAGGACATCC	CAGGTACATGGAGAAGACCGAG	61.055	GGATGTCCTCCATCTCCTTCTC	61.34
Unigene14253	CGACGACGACGACGA	CGA(3*5)	GTCAAGTTCCAGAACATCTCCCTCGAGGACGCGTGCAAGATCCTCGACCGCTACGTCGGCGGCGGCGGCCGCCG[CGACGACGACGACGA]CCGGGCCCAGGGCGGCAAGAGCCTCCGCAGGCGCCTGCTCAACCACTGCGAGAAGGACAT	GTCAAGTTCCAGAACATCTCCCT	60.888	ATGTCCTTCTCGCAGTGGTT	59.727
Unigene1428	TGATGATGATGATGA	TGA(3*5)	AACTGGTGGAAAAAGAAGAATCCAC[TGATGATGATGATGA]GGAAGATGATGGCGATGATGTGGATGATGAGGACGATGATGAGAACATGGAAGGATCAAGTGACGATGAGGATGAATCTGATGAGGAAGAGGGTGATTCCGAAGATGAAAGTGAC	AACTGGTGGAAAAAGAAGAATCC	59.874	GTCACTTTCATCTTCGGAATCAC	59.997
Unigene14374	ATATATATATAT	AT(2*6)	CAAGCTTTTGAGTCTGCATTTTTAATTCTTTGGAGAAGTCTAATTTGTCCCCTG[ATATATATATAT]TCTAACTTCTAAGTCTGTTCTTCATTTAATATTATGAATAGACTTCGGAAATGGTGATTCATTATATCACCTCATGTAATATGCTCGTG	CAAGCTTTTGAGTCTGCATTTTT	59.946	CACGAGCATATTACATGAGGTGA	60.032
Unigene14410	CAGGCTCAGGCTCAGGCTCAGGCT	CAGGCT(6*4)	CATGCCTCATGTTGATTCTTACAAAACACCAG[CAGGCTCAGGCTCAGGCTCAGGCT]CAGTCTCCCTACTCTGTGGTGGATGATCCCTTTCACCATTCAAGGCCAGTGCAACATCCAGAGCTGCTTCTAAAGATCTG	CATGCCTCATGTTGATTCTTACA	60.011	CAGATCTTTAGAAGCAGCTCTGG	59.812
Unigene14454	TAATAATAATAATAA	TAA(3*5)	AGGCAAGAATAAGATAGTTGGGCAGCAGCAGCAAAATGGAACCAGTGGGGATCACGTAAATTCGAGGGAAGATAATGT[TAATAATAATAATAA]CAGTAATAATACACAAATGGAAACGCCGAGAAGAAGTTTTTCGGATATGGATTCC	AGGCAAGAATAAGATAGTTGGGC	60.007	GGAATCCATATCCGAAAAACTTC	60.038
Unigene14454	GAAGAAGAAGAAGAA	GAA(3*5)	CGAGAAGAAGTTTTTCGGATATGGATTCCAGAAGCTCGAAAGCCTCAGTT[GAAGAAGAAGAAGAA]GATAATGAGGGATGTAGCTCGGAAGAGGTTAATAGTAAAATCCAAGCACCCGAT	CGAGAAGAAGTTTTTCGGATATG	59.298	ATCGGGTGCTTGGATTTTACTAT	60.108
Unigene14498	TCCTCCTCCTCCTCC	TCC(3*5)	AGTTAGTGTCAGAGGGCTTGTTGCCCTCT[TCCTCCTCCTCCTCC]GTTGGCGAATGAAAGCTAAGCCAAACCTCGTCTTGAGATGCAAGAGAATGCAACCAACGGCAGGTCTGCATTATGGAGCAGAGGTCCTTCATATTCAA	AGTTAGTGTCAGAGGGCTTGTTG	59.861	TTGAATATGAAGGACCTCTGCTC	59.739
Unigene14527	TGCTGCTGCTGCTGC	TGC(3*5)	GGATGTTTTGCAATTTCACTCTCATGATCTGGT[TGCTGCTGCTGCTGC]ATGGGCTTGTTTCTGAGCATAAAACCACCACTGCTGCTGCTTTGAATCCTGTTCTTGAAGGTGCACCAGGACTGATATTCAGAGCAATCCAATTCAATATTTGC	GGATGTTTTGCAATTTCACTCTC	60	GCAAATATTGAATTGGATTGCTC	59.835
Unigene14553	TTTGTTTGTTTGTTTGTTTG	TTTG(4*5)	TCTGTTGACAGATTCTTGAGCAT[TTTGTTTGTTTGTTTGTTTG]TTTTTCCTCTGTAGTGTTTGAAGAATTTAGGAGAATAGGCAATGCTATTAACATGACAGACCCAAGCTCTAGTGCCTTGGTTAGAGTGGAGAGCACAGACACA	TCTGTTGACAGATTCTTGAGCATT	60.303	TGTGTCTGTGCTCTCCACTCTAA	60.103
Unigene14568	AAGAAGAAGAAGAAG	AAG(3*5)	TACCAGGAAAAGATGTCATCCAAATAAATATAAAACAGAAGTAGAAGTAGGAACAGCTCTGCTGTTTGCAGGTCTAGAAACTAAACAAATAAAACAAAGTACTCTTCCTCTTACCTCTGT[AAGAAGAAGAAGAAG]AGCAATGAAGGAAGGAGAAGTGGTA	TACCAGGAAAAGATGTCATCCAA	60.707	TACCACTTCTCCTTCCTTCATTG	59.64
Unigene14591	ATATATATATATATATATATAT	AT(2*11)	CAAGGCTTAACCAACGAAATATGTC[ATATATATATATATATATATAT]GACATATTTCGTTGGTTAAGCCTTGATGAAATCAAGCTGGTAAATCTCTTAGCATCCCTCTCACATC	CAAGGCTTAACCAACGAAATATG	59.911	GATGTGAGAGGGATGCTAAGAGA	59.862
Unigene14613	CTCTCTCTCTCTCT	CT(2*7)	TTCATAAGCTTCACGTACCTGTGCAGTAAAGTTTTGATCTTTGGGTTTCTGATCGGCTGCAATCCATCCTTTGCTTTGCTTCATCTCACCACCGTCC[CTCTCTCTCTCTCT]GCCTGCTCTCGTGAAACTGTTTAATTTCTGGACCGTTCATGTCT	TTCATAAGCTTCACGTACCTGTG	59.344	AGACATGAACGGTCCAGAAATTA	59.885
Unigene14647	ATATATATATAT	AT(2*6)	ACTTCATTGGGTCGATAAAGGATATTTAAAA[ATATATATATAT]TGTATATCCAGGCTGGGCATCGACGAACGTTTCTTTGTACTTGG	ACTTCATTGGGTCGATAAAGGAT	60.089	CCAAGTACAAAGAAACGTTCGTC	60.082
Unigene14665	GACTGGACTGGACTGGACTG	GACTG(5*4)	TTGGCTCTGATTTCTTGTTTTTCTAGAACCAGACAATTAAACACCAGAATGATAGATGGCTATACCATAAGTGGGACAT[GACTGGACTGGACTGGACTG]GACTTGACTTATTAGTAGGAATTAGGACTGTATACATAATGCGGGTT	TTGGCTCTGATTTCTTGTTTTTC	59.765	AACCCGCATTATGTATACAGTCC	59.2
Unigene14669	ATATATATATAT	AT(2*6)	CAGATCCTACCCTAACTCCAACCGACTGGTTCCTGCAGAAAGCACACAATATATACA[ATATATATATAT]TCCTCTGATGAAGATACGAAAGACGCGAATCTCCTGAGCAGAACTGAAGATGTTGATTGATGGGGTATTTAAGCAG	CAGATCCTACCCTAACTCCAACC	60.241	CTGCTTAAATACCCCATCAATCA	60.207
Unigene14709	CTCCTCCTCCTCCTCCTCCTC	CTC(3*7)	CAGATTCCATCATAATAGCAGCCTCCCCCAAAGGATATCTGAGCTCTAACAACAGGAA[CTCCTCCTCCTCCTCCTCCTC]GCATGGCAGAAAATGCCTGGTTCAAACGTGCTGCTTGGCACATCATCTGGCTAATTCTCT	CAGATTCCATCATAATAGCAGCC	59.969	AGAGAATTAGCCAGATGATGTGC	59.766
Unigene14719	CTCTCTCTCTCT	CT(2*6)	AAGAAAAGCCACCTAATTTCCATATTTATCCCTCG[CTCTCTCTCTCT]AGATAGATAGATAAGAAGCTAGGACATATAAATACTTCAGAATATGATTCACTGTTAAAATAACGCCAAAAAGAGTGAGCATTAATAGAGGCCC	AAGAAAAGCCACCTAATTTCCAT	59.436	GGGCCTCTATTAATGCTCACTCT	60.128
Unigene14744	TTGTTGTTGTTGTTGTTG	TTG(3*6)	CAGAATGTCATCATCGTTGTCTTCTTCTTCTTCA[TTGTTGTTGTTGTTGTTG]GGCATGGGGGCAAGCTCCGTTGCTGTTGGTGCAGCAGGTGGGTGCAGCTGCAGATGCTCTGCAACGTGGTCTCTGCAGGAAAGGGAT	CAGAATGTCATCATCGTTGTCTT	59.115	ATCCCTTTCCTGCAGAGACC	60.596
Unigene14776	CACCACCACCACCAC	CAC(3*5)	TGCCTAATACAGAAGTCCCAGAGGTGGCATTAATGGCCTTGATGACAATGCTTCCAGCCCCCCCAAACTTACCACCAGAAT[CACCACCACCACCAC]CTCCTTCTCCCAAAGCATCTGCAACTCTTATGGGTTTTATTGCATGCCTAC	TGCCTAATACAGAAGTCCCAGAG	59.791	GTAGGCATGCAATAAAACCCATA	60.108
Unigene14836	TATATATATATA	TA(2*6)	ACTGGAGCACATAGAGCAAATCTGTAAAACATTAAGAACATATTCAGAAATAAGTATTT[TATATATATATA]TGATATGTGTTCGGTTCTTAATTGTATAAAAACCATTTAACTCTGGCTTTGACTCTAGAGTCTAAACAAGTGCCTTCAGC	ACTGGAGCACATAGAGCAAATCT	59.451	GCTGAAGGCACTTGTTTAGACTC	59.6
Unigene14842	TTCTTCTTCTTCTTC	TTC(3*5)	CCACCAAAAATCCAAACGTATTACT[TTCTTCTTCTTCTTC]TTTCTTCACAATGTAATACGTTCCACCCATGATTTCTTTCTTTCAG	CCACCAAAAATCCAAACGTATTA	59.994	CTGAAAGAAAGAAATCATGGGTG	59.987
Unigene14944	CTACTACTACTACTA	CTA(3*5)	ACTACAGGTCGTGTTGAATGCTTTTGATTTGAACATAAAATATCATTTGACATATAG[CTACTACTACTACTA]GCAACAGAACAATGACTACTCTCAGCTTCCTCAATTGATCGATTTAATCTGTCTTCAAATGAAGACATGCATACACGT	ACTACAGGTCGTGTTGAATGCTT	60.109	ACGTGTATGCATGTCTTCATTTG	59.94
Unigene15005	CTCTCCCTCTCCCTCTCCCTCTCC	CTCTCC(6*4)	CCATTGATGTATTACAATTCGCAGGTTTATACCCCGATATTGCAGTACTT[CTCTCCCTCTCCCTCTCCCTCTCC]CTGCTGCTCCTGTTTCTCTGCTAGGGTTT	CCATTGATGTATTACAATTCGCA	59.746	AAACCCTAGCAGAGAAACAGGAG	60.292
Unigene15108	GTGTGTGTGTGT	GT(2*6)	CATGTGTAAGAAAAGCATCACCATAGACAGGCTTGCTTGGTGTCGGAA[GTGTGTGTGTGT]ATTATTATTGAGAACGAGAGCAGGGCAGAGCAGGGGCAAGAGTATGCGTGCGTGCGTGAGTATATGTGTTGTCAGGAGAAGAAAGAAAATCG	CATGTGTAAGAAAAGCATCACCA	60.046	CGATTTTCTTTCTTCTCCTGACA	59.879
Unigene1512	ATATATATATAT	AT(2*6)	TCTTTGGATCTTCTAAAGCGTTGTCGGCATGCAGCAGCTTCTGTTGGCAATCAA[ATATATATATAT]GGTGGATTAAGAGGAGAGATTTTTCTTGATGATCTTCTAGTGTCAGAAGACACAGCAAGCAGAAGGGGCACTGATTTAGATGATCCTGT	TCTTTGGATCTTCTAAAGCGTTG	59.906	ACAGGATCATCTAAATCAGTGCC	59.5
Unigene15175	GAAGAAGAAGAAGAA	GAA(3*5)	TAGCTTTAGCTTGCAACTTGGTTGTACT[GAAGAAGAAGAAGAA]AGAGCTAAAGGTGTTAGTGGGAAAATAGAAACAAGTAAGTTGCCAGGGCCTATGCAAAAGGAGACAGTCAGAGGAGTTGGTGAC	TAGCTTTAGCTTGCAACTTGGTT	59.645	GTCACCAACTCCTCTGACTGTCT	59.828
Unigene15243	ATATATATATAT	AT(2*6)	AGGATTTTCCTATTCTTAGGGCACAAGTTTTCCCCCCTTGCTTCTCGTGCGTGCTTGCCAAGTCACTGTTGACACC[ATATATATATAT]CTATAGGCTATGAAGGGTATTTAGGTTAGTATTGTTTCTCCGGCGTTTGAGAGAAAGAGACCGATTTTTCC	AGGATTTTCCTATTCTTAGGGCA	59.516	GGAAAAATCGGTCTCTTTCTCTC	59.734
Unigene15291	GAGAGAGAGAGA	GA(2*6)	AAGCTCTTGGCCACTCTAAAGACATT[GAGAGAGAGAGA]TCCAGCATTTTATCAGCATTGCTATCTATTAAGGCAGGGCGAGCAACCAAGAGAAGGCTCTCTTTTGTTATTCAATCTTGTGGAAGATCAGATTGCAGGGACCAGTGGATATGTAGAA	AAGCTCTTGGCCACTCTAAAGAC	60.423	TTCTACATATCCACTGGTCCCTG	60.248
Unigene15297	AGCAGCAGCAGCAGC	AGC(3*5)	TTGAATTCAGGCCGATTATTAAGACTATGGATTTTGATCTTGATATTGAGTTTGGTAACAAAA[AGCAGCAGCAGCAGC]AGATACCAGGGCGATCTCCTTCGTTCTTTTCC	TTGAATTCAGGCCGATTATTAAG	59.509	GGAAAAGAACGAAGGAGATCG	60.194
Unigene15323	TGGTGGTGGTGGTGG	TGG(3*5)	GGAGGAGGAGTTGCATTTTTATTAATTGGTGGAGGTGACAGTGATGGTGGAGGAGACGGTAGGGATTTTTTTAT[TGGTGGTGGTGGTGG]TGTAAGAGGAGGTAGGGATTTATTTATCGGTGGC	GGAGGAGGAGTTGCATTTTTATT	59.867	GCCACCGATAAATAAATCCCTAC	59.959
Unigene15334	AGAAGAAGAAGAAGAAGAAGA	AGA(3*7)	CTTCTGATTCGACGAGGAAGACGAAGATGAGCCCAGAACTCGACCTTGGCCTTTGAATTTTCC[AGAAGAAGAAGAAGAAGAAGA]GGCAAAGGGGTTGTTTATTTTCTTCATAAAATCCTTGACCTTGCCCTTTACCTCATCCATCTCTAGAACTCCGA	CTTCTGATTCGACGAGGAAGAC	60.382	TCGGAGTTCTAGAGATGGATGAG	59.856
Unigene15352	TCCTGCTCCTGCTCCTGCTCCTGC	TCCTGC(6*4)	TTCTAGAAGCTCCTCCTCCCTCACCTCCCCCACCTCCTCCCCCTCTCCCACCTCT[TCCTGCTCCTGCTCCTGCTCCTGC]TGCCCCATCTGCTGATCAAGCTAACAATCCCAACAATC	TTCTAGAAGCTCCTCCTCCCTC	60.458	GATTGTTGGGATTGTTAGCTTGA	60.358
Unigene15353	GCTGCTGCTGCTGCTGCT	GCT(3*6)	CACTTCCAAGCACATCCTCATCCCCTCCTGCAAGCTGAGCCA[GCTGCTGCTGCTGCTGCT]GTTTATTATAGTTATCTGTACTGATAGTATTATTGTTGTGATTACTGCTACTATAATTATTAGCAGTAGTAGCAGTATTGCTGGTGTTGTTGAGCT	CACTTCCAAGCACATCCTCAT	60.126	AGCTCAACAACACCAGCAATACT	60.24
Unigene15378	AGAAGAAGAAGAAGA	AGA(3*5)	CTGCTCACATCCTCTGACTCTTTTATTCACAGGACTGTGGCCT[AGAAGAAGAAGAAGA]AGTGTACGTTCTGTGTGAGAAGAAGGAATATGGC	CTGCTCACATCCTCTGACTCTTT	60.067	GCCATATTCCTTCTTCTCACACA	60.497
Unigene15433	GAAGAAGAAGAAGAA	GAA(3*5)	TGCACATAGAAACAGGAAATGTGATTAGGGAAGAATAT[GAAGAAGAAGAAGAA]GGAGAGGCATTTGGAACAGTGAAAAAGATAATTGGGAGCAGGGCTGTTGGGGGGAACATGCAGTATTTGATAG	TGCACATAGAAACAGGAAATGTG	60.046	CTATCAAATACTGCATGTTCCCC	59.75
Unigene15470	CAGCAGCAGCAGCAGCAG	CAG(3*6)	GCATTTTCTGTTTCTGTGGTCATTTTTAGCTAGAGAACTTAAATGCAGGAGGTAGCTGTCTACCCT[CAGCAGCAGCAGCAGCAG]GGGGTCATATCTTCGTCGTCTCCTTGCTGCGAAGATAGTGGAGATGAGGAGCTTTCTG	GCATTTTCTGTTTCTGTGGTCAT	60.407	CAGAAAGCTCCTCATCTCCACTA	60.026
Unigene15541	GAAGAAGAAGAAGAA	GAA(3*5)	CTTCCAGCAACAACAATTTCTTCGCCCTCCCCTTGCACCCACTGATTCTTCTGCTGTGAGAGAG[GAAGAAGAAGAAGAA]AATAAGAGTAATAAGGAGAACATTCCCCCAT	CTTCCAGCAACAACAATTTCTTC	60.156	ATGGGGGAATGTTCTCCTTATTA	59.93
Unigene15580	ATTATTATTATTATTATT	ATT(3*6)	TTCTTCCACCATTGTTTCTCTGTACTGCCAGAACAA[ATTATTATTATTATTATT]CAATAAATCAATCCCCGTTATGATCTCACCATATA	TTCTTCCACCATTGTTTCTCTGT	60.026	TATATGGTGAGATCATAACGGGG	59.943
Unigene15606	GATGATGATGATGAT	GAT(3*5)	GGAATCAAGAAAGTAGTGGGCTTGGAAAGCAAGTGATGAAGGCACACACAGACAAGGAAAAGCAAAGACCAGAAAAGCATCAGAGATCAGTTTCTAAGATACCCAGTGGGGATACGAG[GATGATGATGATGAT]ATATCATTTGTTGTGGTACAGAGGG	GGAATCAAGAAAGTAGTGGGCTT	60.018	CCCTCTGTACCACAACAAATGAT	60.158
Unigene15613	CCACCACCACCACCA	CCA(3*5)	CTACGACCACCATAAGGCCCTCTGCCACCACGGCCTCCACGTCCACCAGCTCGT[CCACCACCACCACCA]CGCCCGCGATCGTTCGAAGCTCCATCTCCATCCTCATTACGGCTGGGGATCAAATCAGAATTGTTGTCATAGAACCCACCAC	CTACGACCACCATAAGGCCC	61.633	GTGGTGGGTTCTATGACAACAAT	60.033
Unigene15628	CTGCTGCTGCTGCTGCTG	CTG(3*6)	GCTGTAGAGACTGGCGAAGATTATTTTGTGA[CTGCTGCTGCTGCTGCTG]TTGCATGGATTCGAACCCTGGACGTTTGGTGGGCAGCGAAACTGCGGACGAAGAAGAAGAAGGGGAAGGAGAAG	GCTGTAGAGACTGGCGAAGATTA	60.055	CTTCTCCTTCCCCTTCTTCTTCT	60.682
Unigene1567	TTGTCCTTGTCCTTGTCCTTGTCC	TTGTCC(6*4)	GTGCTTCTTGTGTTCCTTGTCTTTGTCT[TTGTCCTTGTCCTTGTCCTTGTCC]TTGTGCTTCTTATGCTTCTTGTCTTTATCTTTGTGATCATGTTTGACCTTCCCACTGATAGT	GTGCTTCTTGTGTTCCTTGTCTT	59.846	ACTATCAGTGGGAAGGTCAAACA	59.914
Unigene1571	AAGAAGAAGAAGAAG	AAG(3*5)	TTCTGTGAGGATTGTTTCGATTTCTCGAGACGGAGAATTGATTCCTGTAGTTCTGTCACCTGCCAGGAAATCAATTTCCAATGATCAGCAGCCCTCC[AAGAAGAAGAAGAAG]CCACCGGGTTTCGATGCAGCATCTATTAAGGTGAAATCACACGATGC	TTCTGTGAGGATTGTTTCGATTT	59.994	GCATCGTGTGATTTCACCTTAAT	60.258
Unigene15780	CTCCTCCTCCTCCTC	CTC(3*5)	ACCAATTCCTTCTCAAATTCCTCCCATTCAATCACCTTCAACTCTTT[CTCCTCCTCCTCCTC]ATTTACCAAGCAATATCCCTCCTC	ACCAATTCCTTCTCAAATTCCTC	59.839	GAGGAGGGATATTGCTTGGTAAA	60.652
Unigene15788	TGATGATGATGATGATGA	TGA(3*6)	TGGAGGTCCTACAGAATTGAGAAGCTCTTCTCCAAAACCTGAGAGACTTCCCAGTGCAGGAGTTCATGTATCTAATGATCTTGAGGAAAAGGAGATAAG[TGATGATGATGATGATGA]TCGCAACCATAAACATAGAAGGAG	TGGAGGTCCTACAGAATTGAGAA	60.116	CTCCTTCTATGTTTATGGTTGCG	60.03
Unigene15832	TATTATTATTATTAT	TAT(3*5)	TGGCTGTATATTGTTTGATGTGCTTAC[TATTATTATTATTAT]GTTTGCCAAAGTGACGCACAAGCATCGAGCCACCCCAAATCAGATTCTGATTCTCGGAGGCTTCCAGAAGGGCGAAGTGGCAGGCAACGAAAGAGGACACGATTTTCT	TGGCTGTATATTGTTTGATGTGC	59.909	AGAAAATCGTGTCCTCTTTCGTT	60.509
Unigene15858	ATATATATATAT	AT(2*6)	AACCAGAAAATATTCCCCAAAAAAACACGGC[ATATATATATAT]TATTTTCACGTCCAAGCTTACAGATTCCGCTTATTATCAATCAATCTCTCTCATGTGTTTGCTCGGAAGGAGGGGGCCACTATTTACGCCGGCATATTGGAGTTTTTGCAGAGA	AACCAGAAAATATTCCCCAAAAA	59.948	TCTCTGCAAAAACTCCAATATGC	60.609
Unigene15878	CGCCGCCGCCGCCGC	CGC(3*5)	TTAGAGGGCGTGGAAATAAAGATGCTGAGGATGAATGCATTGGAAACTGGGCGAGAATTCTGAGTGTGGAAGCGTGGACTGCAATTAACGA[CGCCGCCGCCGCCGC]CGACTGCCGGCGCTATCCTGACTGAGCTTAATCCATTTG	TTAGAGGGCGTGGAAATAAAGAT	60.32	CAAATGGATTAAGCTCAGTCAGG	60.136
Unigene15888	CCACCACCACCACCA	CCA(3*5)	GGAATTCTCACCGAGGATTTAACGCAAGAGACAATATTAACATGCAATCAAGAGTTGGACCAAGAAATTTTCTCAGG[CCACCACCACCACCA]CCTTTTATTGGTCCATCTTCACCA	GGAATTCTCACCGAGGATTTAAC	60.193	TGGTGAAGATGGACCAATAAAAG	60.223
Unigene15891	TCATCATCATCATCA	TCA(3*5)	CATAAAATTGTCAGGTTCCTCCATATGAGAATCCTGATCCTTGTTATGCTTATCCTTCTTTCTTTTCTTCTTTTCCTTCTTTTTCTTTTTCTCAGCTTGCCCAGAC[TCATCATCATCATCA]CCCTTGTCTTTATTCTTACCCTTCCACAATTCCTT	CATAAAATTGTCAGGTTCCTCCA	60.223	AAGGAATTGTGGAAGGGTAAGAA	60.217
Unigene15892	AGGAGGAGGAGGAGG	AGG(3*5)	CTGCTAGGCCTAATGTTGAGAGATATAAATACCCATGGGAAAAACAAGAACAGGA[AGGAGGAGGAGGAGG]AGTAGAGGTAGGCCCAACTACCTTAAATTCAA	CTGCTAGGCCTAATGTTGAGAGA	60.048	TTGAATTTAAGGTAGTTGGGCCT	60.232
Unigene15956	AGGAGGAGGAGGAGGAGG	AGG(3*6)	ACCATTTCCATTGCAGAGTAAGATATTTTTTTATTTTGTTAAGGGGGAGATTAGATTGAAGACTTATACTTGTCTTGTGGATAAAGAACCTGATGTTAGTAA[AGGAGGAGGAGGAGGAGG]TAGTAATGGTTTAGAGGTTGGTACTGGTG	ACCATTTCCATTGCAGAGTAAGA	60.014	CACCAGTACCAACCTCTAAACCA	60.314
Unigene15956	TGCTGCTGCTGCTGC	TGC(3*5)	TTTAGAGGTTGGTACTGGTGGTGGCAGTGGCAGTGGTGGTGGTGCTGA[TGCTGCTGCTGCTGC]AGGTGGTGGTGCGGCTGGTGCTGCTGCAGGTGATGGTAGTGGTGGTGCTGCTGCTTCTGGCAAGGCAGAGGCAGGTGGAAAAACCTTGGCTGTTGAG	TTTAGAGGTTGGTACTGGTGGTG	60.314	CTCAACAGCCAAGGTTTTTCC	61
Unigene15964	CCACCACCACCACCACCA	CCA(3*6)	TGTAAGCAGCATCATTAGGACAACCACG[CCACCACCACCACCACCA]CAAGTCTCGGCTTGCCCTCGATCGACCCAGGTGGCCATGGCGTTATCTGTTCGAATTGTTGTCGTCGGAGATGTGCATGATGATTGGGATCCTTTACAAG	TGTAAGCAGCATCATTAGGACAA	59.793	CTTGTAAAGGATCCCAATCATCA	60.19
Unigene15972	CAGCAGCAGCAGCAG	CAG(3*5)	AAAACCAGAGGTAGGCTGGTAAGAATGCCGTCATCGCCGAGCCGAAAGGTAATTCCCCTGTGGCAAAATGGCCGCCATGAGAAGGCCAAGTCACGC[CAGCAGCAGCAGCAG]CGGAGATGGGGTTCGTTTTTTAACTATGCCTGCTTTTGTG	AAAACCAGAGGTAGGCTGGTAAG	60.063	CACAAAAGCAGGCATAGTTAAAAA	59.745
Unigene16069	GAGGAGGAGGAGGAG	GAG(3*5)	TAAATTTCACATCGTTCTCTCCGCACGAAAAACCGCGACCCCATC[GAGGAGGAGGAGGAG]AATCCAGAGGCCGATCACCTCGGCCAGAATACAGAAAAAGCCCCAATTTGT	TAAATTTCACATCGTTCTCTCCG	60.476	ACAAATTGGGGCTTTTTCTGTAT	60.12
Unigene16094	ATATATATATATATAT	AT(2*8)	TTGTTCGAAAATTTCCAGTCATTTCCGCATATACACATA[ATATATATATATATAT]ACCAAGCAGCAACACACAGGGTACATGAACCATATCAGAGCATTCTATTGATTTGGGTTTTTCAGTTCTTCATCTGCATATTCATTGGA	TTGTTCGAAAATTTCCAGTCATT	59.871	TCCAATGAATATGCAGATGAAGA	59.561
Unigene16120	CAACAACAACAACAA	CAA(3*5)	CAGATAACGAATGATCAACCCTCGTGATCACTAAGTACTCCATCATCATTATCACCGCCAAACCT[CAACAACAACAACAA]GGCCTGCAAGCACTTGAACAAGAAAATCAAGAAAAATCAAGAAGCCGACTGATCT	CAGATAACGAATGATCAACCCTC	59.849	AGATCAGTCGGCTTCTTGATTTT	60.603
Unigene16147	GGAGGAGGAGGAGGA	GGA(3*5)	GAACATTCCCAAGACAAATACCAATAAGAGACCGGCCGAAACTGCTTCCTATGGAGGTGCCGGG[GGAGGAGGAGGAGGA]GCAGCAGGAGGTGTTTGTTTTAAATG	GAACATTCCCAAGACAAATACCA	60.102	CATTTAAAACAAACACCTCCTGC	59.926
Unigene16185	TCATCATCATCATCA	TCA(3*5)	CTTGAATGACTTCCATCATCACAATTCTTCTCATCAGCATCTTCT[TCATCATCATCATCA]CTACAATCAATCACTTCCAATATTTCCAGAGCCTGGATATTCTCATCGGGCAATAGCTCGCTCACCATCTGTTGAGCTTCTTCAGT	CTTGAATGACTTCCATCATCACA	59.985	ACTGAAGAAGCTCAACAGATGGT	59.447
Unigene16194	GAGGAGGAGGAGGAG	GAG(3*5)	AGGAGGTGGCAGAGGAAGTAATAATGGCCAGCACA[GAGGAGGAGGAGGAG]GCCGCGTCGTCTTCTTCTTGCACGATGGATAAGTTTGAAGGTCTAACACTGAAAGAGGGG	AGGAGGTGGCAGAGGAAGTAATA	60.49	CCCCTCTTTCAGTGTTAGACCTT	60.043
Unigene16223	GCCGCCGCCGCCGCC	GCC(3*5)	CCAAGCAGATCATCAAACTTACCAAGCGCAAGAGGGAAGGCGAGGCGGGGAAGACGAAGCAGCAACCGCAGGAT[GCCGCCGCCGCCGCC]TCGCAGCATCACCCGCGCAAGAAAATTAAGACAACGTC	CCAAGCAGATCATCAAACTTACC	60.014	GACGTTGTCTTAATTTTCTTGCG	60.173
Unigene16308	ATAATAATAATAATA	ATA(3*5)	ACATTTACAGAAACAATGCCACCCTATCATAGGGTACGATATGTTATGCTTCATAAAGCTCAAGATCATGAACCATAACAAATCCTATAT[ATAATAATAATAATA]AAACTCTTAACAATGTTTCTTGCCATG	ACATTTACAGAAACAATGCCACC	60.163	CATGGCAAGAAACATTGTTAAGAG	60.056
Unigene16354	CTGCTGCTGCTGCTG	CTG(3*5)	TCCCCATAAATAGGGACTTGTCTGACCTCGTTTAATCCGAACTGCCCGCATTGGGAACTGACCATTAATCCAGGCAGCGAGCTCTGCACAGGCGC[CTGCTGCTGCTGCTG]GTAACTGAAGATATAATGCGGGATTGA	TCCCCATAAATAGGGACTTGTCT	60.082	TCAATCCCGCATTATATCTTCAG	60.299
Unigene16355	CAGCAGCAGCAGCAGCAG	CAG(3*6)	ATTAACGAGACTGGAAACCTTGCAGGTACTGTTAATAATTCATCTGCATATGGCAGC[CAGCAGCAGCAGCAGCAG]CATACCCACAGCGCTCAGATGTCTGCAACGGCCTTACTTCAGAAAGCTGCTCAAATG	ATTAACGAGACTGGAAACCTTGC	60.856	CATTTGAGCAGCTTTCTGAAGTA	58.845
Unigene16394	ATATATATATAT	AT(2*6)	AAATCTGACTCTTATTCTGCCCACCTC[ATATATATATAT]TGTTAGCTTAGCACATGCGCCTCATCGCCACTACTTTTTTTCTTGGACGACGAGGTTGAGCAGCGACCAAGAACAGAAGCAACAGTGCCCCCAACCCCAACCCCAAATACACCACATACT	AAATCTGACTCTTATTCTGCCCA	59.277	AGTATGTGGTGTATTTGGGGTTG	59.92
Unigene16396	ATATATATATATATATATATAT	AT(2*11)	CGATTAATGTTGACTGACATTGG[ATATATATATATATATATATAT]TGTTAGCTTAGCACATGCGCCTCATCGCCACTACTTTTTTTCTTGGACGACGAGGTTGAGCAGCGACCAAGAACAGAAGCAACAGTG	CGATTAATGTTGACTGACATTGG	59.393	CACTGTTGCTTCTGTTCTTGGTC	61.248
Unigene16594	ATCATCATCATCATC	ATC(3*5)	ATGGCCTAGATTTGGATTTTGATTTGGATTTGGATTTAGGTTTAGATTTAGGTTTAGGTTTAGGTTTTGAAAATATATGATGG[ATCATCATCATCATC]ATGCTCATCATCAGATCCCGGTTTCGATCTCGCCCGTGTCTGTTCATGACATTTC	ATGGCCTAGATTTGGATTTTGAT	60.057	GAAATGTCATGAACAGACACGG	60.419
Unigene16623	CCACCACCACCACCACCACCA	CCA(3*7)	AGGATCATTGGTACCTCGTCCCCTGCCACGG[CCACCACCACCACCACCACCA]GAGCTACCAGCAGGTCGTGCAGTTCCACAGCGGTTACAAACTCCACGAAATGCAAAGTTGACATTGGAACAGCTTGAATTTGGACAAAG	AGGATCATTGGTACCTCGTCC	60.205	CTTTGTCCAAATTCAAGCTGTTC	60.156
Unigene16661	AGAGAGAGAGAG	AG(2*6)	CAGAGAGCTGATCTACGGGAGTATGAA[AGAGAGAGAGAG]ATTCGCTTGGCTCAGCTGTCGAAGAGACGGGTGGATTCTCAAAGAGATTAAGCTCAGGAAGTATTAAAAATATTTTCTACGATTATTTCTGGCCA	CAGAGAGCTGATCTACGGGAGTA	60.047	TGGCCAGAAATAATCGTAGAAAA	59.98
Unigene16732	ATCATCATCATCATC	ATC(3*5)	TTTTTCCACGTGTAATGTTTCCTGCATAATCTCCGCCAAA[ATCATCATCATCATC]CAAATTAGGGGAGCTGGCCATGACAATGGAGACGGTCGACAGCAAATCTTCACTCTACTTCTCTGTAGAAATTAAGTACTGCTGCTGAAGACGAA	TTTTTCCACGTGTAATGTTTCCT	59.801	TTCGTCTTCAGCAGCAGTACTTA	59.367
Unigene16770	TCTTCTTCTTCTTCT	TCT(3*5)	CACTGCCACCCATAACTATCTTC[TCTTCTTCTTCTTCT]GCTACTTCCAACAAATGAAATGATATCCGGATATATGTATATATGTATTTGATGATTCCACACTTACTGCAAATACATTCGCTCGGATTATTCACCTCAAACCCCACACCAGTTTTTAATT	CACTGCCACCCATAACTATCTTC	59.906	AATTAAAAACTGGTGTGGGGTTT	59.913
Unigene16788	AGAAGAAGAAGAAGA	AGA(3*5)	CTGAAGGATTAATATGTCGTGGCACAACAGAGCCTCCAATTCGCATTAGCCCATCACTGGTAAACAGAGTAATAGTATCTTCCTGTACCCATTGTAAAGCGTCAGG[AGAAGAAGAAGAAGA]ATCCCAAGGATATAATCCGAATTC	CTGAAGGATTAATATGTCGTGGC	59.877	GAATTCGGATTATATCCTTGGGA	60.343
Unigene16844	ATTATTATTATTATT	ATT(3*5)	CAGTCATTGGGTCACCACTTCCCAA[ATTATTATTATTATT]CCTCGAAGCCGAAGACCGGGTGCTCCGCGAGAACCGCTTCAGCTCTTGCGAGAACTGCTTCACTCTGGCAGAGGCCTCAGCCTTGAGCTCCTGCGAGAATTGCTTCAATCTACTGG	CAGTCATTGGGTCACCACTTC	60.415	CCAGTAGATTGAAGCAATTCTCG	60.263
Unigene16900	TAATAATAATAATAATAA	TAA(3*6)	AGAGGCTCAATTTTTCTGAATCCCCATCTAGTTCTGAAAATAT[TAATAATAATAATAATAA]TGAAGAAACTGTTAGTGGCCATTG	AGAGGCTCAATTTTTCTGAATCC	60.089	CAATGGCCACTAACAGTTTCTTC	60.048
Unigene16922	ACACACACACAC	AC(2*6)	ATAAGGACCAGTACCCCTCAAA[ACACACACACAC]CCCAACAATCATATACCTTGCCTAGTAATATACATGATATGTACAAAAAAATAGCTGATAAACAGAAGCCACCCCTGATCTGCTAGGACTGCAAGAGAAGCCAAATCAGCTTAA	ATAAGGACCAGTACCCCTCAAAA	60.115	TTAAGCTGATTTGGCTTCTCTTG	60.03
Unigene16951	ACACACACACAC	AC(2*6)	TTTTCACAAATAAATACTGCGGGAAGAAACTATCATTGGAATCTCCGAAAATCTA[ACACACACACAC]ATAAAAATGGCACCATTATTTTTGGACAATTG	TTTTCACAAATAAATACTGCGGG	60.234	CAATTGTCCAAAAATAATGGTGC	60.453
Unigene16993	GAGGAGGAGGAGGAG	GAG(3*5)	GATCTAATACTCAGCGAGGACGAGGAGCTGGCGGAGGAGGAAGAGGAAGGGGAA[GAGGAGGAGGAGGAG]GCGGTAGAGGTGGCGGAGGGCAGCAACGATGGTGGGATCCAGT	GATCTAATACTCAGCGAGGACGA	59.891	ACTGGATCCCACCATCGTT	60.192
Unigene17045	GCCGCCGCCGCCGCCGCCGCC	GCC(3*7)	ATTCTCGATATTTCACACTGCGTGGCTTTGCCAGGGACGCCCCA[GCCGCCGCCGCCGCCGCCGCC]TCGTGTGACAACGGGCGGATCTCCTGATCCGAAGCCGTGCTGCAGTTGTCGGCGCCCATATTACTATTGTTCGGCTTCGAATTC	ATTCTCGATATTTCACACTGCGT	60.041	GAATTCGAAGCCGAACAATAGTA	59.657
Unigene17052	AGAAGAAGAAGAAGAAGA	AGA(3*6)	TATCTTCCCCTATCTATTTCGCCAACTGTAACTATATGAGAGAGAGGATACTCAGATGGAT[AGAAGAAGAAGAAGAAGA]ATATCACTTAGCCAGCTGCAGTCAAGACAAACTCCATTATATCGTCCTCG	TATCTTCCCCTATCTATTTCGCC	59.821	CGAGGACGATATAATGGAGTTTG	59.871
Unigene17062	TCCTCCTCCTCCTCC	TCC(3*5)	AAACTTTCTTCTTCCTCGAATGCACCTGACTCCCCCTCTTCCTCGAATGCACCTGAA[TCCTCCTCCTCCTCC]TCGAAATCACCTGACTCCGCTTCCCGAAATTCTTTCCCTTCAGATTCTTCTTTAAACGTTAAGAAAGTCGAAGCCAGCTT	AAACTTTCTTCTTCCTCGAATGC	60.243	AAGCTGGCTTCGACTTTCTTAAC	60.413
Unigene17073	AATAAAATAAAATAAAATAA	AATAA(5*4)	TTAGGAGCACATTTTCGATTGTTGATGTGCCAACCTGTAAATATACTACAC[AATAAAATAAAATAAAATAA]AAAATAAATTGCTAAAATTGCTTGTCAAGCTTTTTTTTCAGCTTTTTCCTGCCGGACGTAAGGATACTCTGAAGGTGCAATCCAG	TTAGGAGCACATTTTCGATTGTT	60.017	CTGGATTGCACCTTCAGAGTATC	60.144
Unigene17098	ATGATGATGATGATGATG	ATG(3*6)	ATACAGTCCAACTTTCTCCCCTC[ATGATGATGATGATGATG]AAAGTAAACGGAAGTATACTCGACGGGGTAGTTTCCATAGAAGATTCTTGAGGTTTTTGCTACCGTTTTGGTCTCCTTCTTTGCCTACTTTGCCAGTA	ATACAGTCCAACTTTCTCCCCTC	59.888	TACTGGCAAAGTAGGCAAAGAAG	59.959
Unigene17153	AGCAGCAGCAGCAGC	AGC(3*5)	AGAAGAAGCAGCAAAAACATGAGCATCATCCAATGTTAGTGCTGTGCTAGCAATGGCAAGGTGTCTGGGACGTTTGCAATAACGCTCTCCACTGGT[AGCAGCAGCAGCAGC]ATGTGCTATTTCTTTCAGTTTTCTGATTTCCATTCTTCTTCTCCTTGC	AGAAGAAGCAGCAAAAACATGAG	60.069	GCAAGGAGAAGAAGAATGGAAAT	60.089
Unigene17159	CAGCAGCAGCAGCAG	CAG(3*5)	AAACAAGCATCTCAGTTAGGCAGCTTCTACTTTTAGATTCATAGGCTCGAGTAATTGTCAGATCTATTGTCT[CAGCAGCAGCAGCAG]ATATTGAAGTGGCATTGTCAGAGGATGCTCTATGAAATCAGGGTTTGCTACG	AAACAAGCATCTCAGTTAGGCAG	59.961	CGTAGCAAACCCTGATTTCATAG	60.03
Unigene17172	CTGCTGCTGCTGCTG	CTG(3*5)	GCAGGAGAAACTGCTATCAAGAACCTTCTGGGTAAGGTAATATGTCACCAATTCTTCATCCATGGGGTGGAACCTGAAACCTGGGGGCAGATTCTCGTCATCAATCTTATTCAT[CTGCTGCTGCTGCTG]GCTGTTCACAGTCGCTGACTCCAT	GCAGGAGAAACTGCTATCAAGAA	60.035	ATGGAGTCAGCGACTGTGAAC	60.322
Unigene17242	CCTCCTCCTCCTCCTCCT	CCT(3*6)	CATGGTTCCTGGATCCTACTTTCCTCCG[CCTCCTCCTCCTCCTCCT]GCCGGATGGGGGCCTGCACCATGGGCTTCTGGACCCTGGGCCGCCGCCGCTGCCACCACTGCTTCCAATAATCCCGCTGCTGCGGATTCTGGGTCTCCATCTCTGGGTAAGAG	CATGGTTCCTGGATCCTACTTTC	61.057	CTCTTACCCAGAGATGGAGACC	59.207
Unigene17264	CAGCAGCAGCAGCAGCAG	CAG(3*6)	ACTGTAAGCTGCAACAGATGCTTCCTCCGGAGTTACGCCAT[CAGCAGCAGCAGCAGCAG]GGGATTGCACAGGGGATCGATCCCTCCAAAATTCAACTTCCTTGCGCTCACTGTAAATCTTTACTGAATGTACCGCATGGGTTGGATAGATTTGTGTGT	ACTGTAAGCTGCAACAGATGCTT	60.497	ACACACAAATCTATCCAACCCAT	59.518
Unigene17287	AATAATAATAATAAT	AAT(3*5)	TCTAAGACTTGCTGCATCTACCATGTTAATAAAATGCTTAAACCTGACAAAATAAAATAATAATAAAAATGAATAATTATAATAACGAATAAGGATCACATAA[AATAATAATAATAAT]AAATAAATAAATAATACCAAGTTGGTGAACATGAGGGATT	TCTAAGACTTGCTGCATCTACCA	59.191	AATCCCTCATGTTCACCAACTT	59.735
Unigene17288	AATAATAATAATAAT	AAT(3*5)	AGTCAAAAATTCCTGCAGACAAAAGCCAAAAAAACCCATGAATGCAAACGAGAAAGAAAA[AATAATAATAATAAT]AAATAAATAAATAATACCAAGTTGGTGAACATGAGGGATTGCGTTTTTTTGCAATTCACATGACATACGAAACGAAAACC	AGTCAAAAATTCCTGCAGACAAA	60.156	GGTTTTCGTTTCGTATGTCATGT	60.163
Unigene17289	AATAATAATAATAAT	AAT(3*5)	AAAAGCCAAAATAACCCATGAATCCAAACGAGAAAGAAAA[AATAATAATAATAAT]AAATAAAGAGAAAACTTTCAGTTTTGGATTTTGGTAAGTGG	AAAAGCCAAAATAACCCATGAAT	59.972	CCACTTACCAAAATCCAAAACTG	59.795
Unigene17295	GCGGCGGCGGCGGCG	GCG(3*5)	AGCATCCAGATGGTTCCGGGCATTGGCGATCGGCTGCTGGTAGGCGCCACGGTCCACAGT[GCGGCGGCGGCGGCG]GCAGCAGGAGGCATGAGACCCGCAGCCTGGCTAGAGAGGCTAGTAGAACCG	AGCATCCAGATGGTTCCG	59.585	CGGTTCTACTAGCCTCTCTAGCC	60.07
Unigene17296	TGATGATGATGATGA	TGA(3*5)	ACAATAATCCTGAAAAAGGGGAAGGGGAGGACAGTGATGG[TGATGATGATGATGA]AGATGCTCTTAAAGTGGATGAAGCTAAGGTTGATGAGA	ACAATAATCCTGAAAAAGGGGAA	60.064	TCTCATCAACCTTAGCTTCATCC	59.739
Unigene17339	AAGAAGAAGAAGAAG	AAG(3*5)	CTGAAGATGAAGAAGTGGACGAGGACGAGGACATGGAACTCGTGGATGAGAGGGATGTGTTTGAAGGTGTTGAGGGGTCTGGCACCAAGGAGA[AAGAAGAAGAAGAAG]CCGTACAGGCCTGAACATTGCATTCCAAGCCATTTTTGCTAGGGTTTTAC	CTGAAGATGAAGAAGTGGACGAG	60.421	GTAAAACCCTAGCAAAAATGGCT	59.924
Unigene17346	CTCCTCCTCCTCCTC	CTC(3*5)	ATCCCTTTCTGCTTTTTCAACTCCCGGGTTATGTGTTCGAATCCCGGCCATTCCCGCAGCAACAACTG[CTCCTCCTCCTCCTC]CTGATCCTCTACCTCCAGTCTCTTCG	ATCCCTTTCTGCTTTTTCAACTC	60.121	CGAAGAGACTGGAGGTAGAGGAT	60.266
Unigene17358	CTGCTGCTGCTGCTG	CTG(3*5)	GTTCTAGTCTCGTCTCGTGCAGTACCTGGCA[CTGCTGCTGCTGCTG]GCCCTCCGGATCCCTTTGCTTTTCCTCCGAACAATCTGCTCCCGCGGCTGCCTTCTCAGGCGATCATGTCCTAC	GTTCTAGTCTCGTCTCGTGCAGT	60.131	GTAGGACATGATCGCCTGAGA	60.233
Unigene17385	TCCTCCTCCTCCTCCTCC	TCC(3*6)	TGAAAGCGAAGTAGCTTTGGTAAACAGCGGCTTCTTTCTCCCAGCCACCAGAGTTTCAACTTT[TCCTCCTCCTCCTCCTCC]TTCTTTCAACGAGTCGCCATTATCATCCAGCTTGAGGTCATCAAGGCCCTCTTCCAGCGATTTATCATGGTTCTTGT	TGAAAGCGAAGTAGCTTTGGTAA	60.409	ACAAGAACCATGATAAATCGCTG	60.377
Unigene17454	GCAGCAGCAGCAGCA	GCA(3*5)	GAATTCACTGTTTGAGACCAACCAGCCACAACTGTCAAGAGCAATGGCATCTGCCCTTTTTTCTATGCCAATGGCTCCTGGACTGGATGACCCAGCTGACTTCCAGTGGAAATT[GCAGCAGCAGCAGCA]ACAGCAGCAGAAGCTGTCTTTTCCCTT	GAATTCACTGTTTGAGACCAACC	59.899	AAGGGAAAAGACAGCTTCTGC	60.012
Unigene17484	GAGGAGGAGGAGGAG	GAG(3*5)	ATTCAAACATCCCACATGTATCCCAGTTGCATTCCTCGTAGCCACCGCCGGTACATGACGTTATGAAGCA[GAGGAGGAGGAGGAG]AAGGGCAGACGCAAGAAGAAAGCAAAGTTGATAGAGAGTGAAAGACATCGAATTGG	ATTCAAACATCCCACATGTATCC	59.834	CCAATTCGATGTCTTTCACTCTC	60.123
Unigene17554	TTGGATTGGATTGGATTGGA	TTGGA(5*4)	CTCAACTGAACTGCTCTCACTCACTCTGTGTATGTTGT[TTGGATTGGATTGGATTGGA]TTGCTAGTGGGTCAAATTTGACTGTGGGAAACGGGTCGCTGGCTGTGTGTAGGCTCAGCCAACGCTACTCTATAATGGTG	CTCAACTGAACTGCTCTCACTCA	59.841	CACCATTATAGAGTAGCGTTGGC	60.056
Unigene17639	GCAGCAGCAGCAGCA	GCA(3*5)	CTACATATTTCCCCTATCCCAGCACAACAGAACTCTGCAACCTCAATTCCTGCTCATCTAATTTAAAGATCGATCTCCTTG[GCAGCAGCAGCAGCA]GAAGACAGTAGTTATGCACAAGTGCCTGGTGGTGCATACTCCATCTTCCAATGT	CTACATATTTCCCCTATCCCAGC	60.07	ACATTGGAAGATGGAGTATGCAC	60.263
Unigene17676	GAATCAGAATCAGAATCAGAATCA	GAATCA(6*4)	GAATTCAGTTCAGGGAGATGAT[GAATCAGAATCAGAATCAGAATCA]GAAACAAGAACCACCCTGAGGATGTCCTCTTTGCTTGAGATGAAGA	GAATTCAGTTCAGGGAGATGATG	59.954	TCTTCATCTCAAGCAAAGAGGAC	60.012
Unigene17707	AGAGAGAGAGAGAG	AG(2*7)	ATGACTTCTGGACATTTGGAAGAACCAAAAGCTTCTACCTCAAGGTCACCATTTGCAATGGAGAGGATAAATGATAGGCAC[AGAGAGAGAGAGAG]GCCTTCAGGAACAGATGTAAATAAAGAGCGATCTCGAGCT	ATGACTTCTGGACATTTGGAAGA	59.99	AGCTCGAGATCGCTCTTTATTTA	58.875
Unigene17717	TCATCATCATCATCA	TCA(3*5)	ACACAGAGAACTGCTTTCCTCACTAGAGCTACTAGTGGAGGGTGAATAT[TCATCATCATCATCA]GACACGGGATCACAAATATATGTCA	ACACAGAGAACTGCTTTCCTCAC	59.974	TGACATATATTTGTGATCCCGTG	59.6
Unigene17719	AATAATAATAATAATAATAAT	AAT(3*7)	GTTTAGATGGCCACAAAAGAAGATCCAGCGGATCAAAGTTTGGAAAAAGGA[AATAATAATAATAATAATAAT]TATGGGTTTATCCTTTTCTGAATTTGTCATTTGGTTGGTAGTGTTGATCTGGTTCAGAATTGAAGGAATCAACG	GTTTAGATGGCCACAAAAGAAGA	59.659	CGTTGATTCCTTCAATTCTGAAC	59.994
Unigene17729	GGCGGCGGCGGCGGC	GGC(3*5)	AGAGTTGAGAGGGGAAGGTTT[GGCGGCGGCGGCGGC]AGGAGGAGGAGGTGGAGGAGGAGGTGGAGGAGCTGGGGCCTTTCGACGGAGAGAAAATCTCCCAGTGCTTACACCTTTGAAACGCATTCTCACAGAAAACAAAT	AGAGTTGAGAGGGGAAGGTTTG	60.992	ATTTGTTTTCTGTGAGAATGCGT	60.055
Unigene17742	AGCCAGCCAGCCAGCCAGCC	AGCC(4*5)	TTGCTGGAAGTTATAGCAGGATGCTTTAAAATCATCTTTGAATTTGTAGGGTAGAAGGAAGAGAGT[AGCCAGCCAGCCAGCCAGCC]AGTTTGCTGAATGATGAAGCCCTTTCGTTCTCAGCTGTATGTATTTTCTGCTCACAGGAATTCATT	TTGCTGGAAGTTATAGCAGGATG	60.619	AATGAATTCCTGTGAGCAGAAAA	60.122
Unigene17742	ATATATATATAT	AT(2*6)	CCTTTCGTTCTCAGCTGTATGTATTTTCTGCTCACAGGAATTCATTCATGG[ATATATATATAT]TATGTTTTTTATGAAAAATGTGTGAAGCAGATAAACATGTTCATGCAATTTGTAGGCAATTGATGTTCTTACCTGTT	CCTTTCGTTCTCAGCTGTATGTA	58.599	AACAGGTAAGAACATCAATTGCC	59.428
Unigene17770	ATATATATATATAT	AT(2*7)	TCGCAAGTTCACTTGACATCTAAGTTTAGATGGGTTTGTC[ATATATATATATAT]TTTACAAGTCTAACAAAATTATATATGTGTGTTTAGATGGATCTATATTAGGATCTCTATTCAGTGCATTACA	TCGCAAGTTCACTTGACATCTAA	59.934	TGTAATGCACTGAATAGAGATCC	56.074
Unigene17782	TTCTTCTTCTTCTTC	TTC(3*5)	ACGTCGTAATTGTTCCTTTTGAATCCTCCT[TTCTTCTTCTTCTTC]TTTCTCCAAATCACGGATATACTCCTGGAAAATTTCCAATCGATCTATCTTATCCAACCGCGAACATCTCTCATCATCTTCT	ACGTCGTAATTGTTCCTTTTGAA	59.926	AGAAGATGATGAGAGATGTTCGC	59.869
Unigene17806	CTTCTTCTTCTTCTT	CTT(3*5)	TTCTTTCTCTTTCCTCCCTCTTCCTCGTCGTC[CTTCTTCTTCTTCTT]GGTCTCCGTTGCCTTGGGAGCCACCGCCTTTTTTTTCTTTACTTCTTTCTTTGCAGGTTGCT	TTCTTTCTCTTTCCTCCCTCTTC	59.496	AGCAACCTGCAAAGAAAGAAGTA	59.61
Unigene17847	TTCTTCTTCTTCTTCTTC	TTC(3*6)	TTTTCATCTATCTTCGGCACATTCGCTCCTTTATTCGCA[TTCTTCTTCTTCTTCTTC]TTTTTACCAGAGCTTTGTGAGCCATTTCCCTCTACTTTC	TTTTCATCTATCTTCGGCACATT	59.983	GAAAGTAGAGGGAAATGGCTCAC	60.479
Unigene17873	GAGAGAGAGAGA	GA(2*6)	AATGAAGTTAGAGGATGGGATG[GAGAGAGAGAGA]AATCTAGAATCAGATCTTAAGAGTCTACAACAATCTTTGGTGAGTTCAAGAAGTGCACACTGTG	AATGAAGTTAGAGGATGGGATGG	60.546	CACAGTGTGCACTTCTTGAACTC	60.006
Unigene17990	AACAACAACAACAAC	AAC(3*5)	CGTTAACCCCAATTTATTCCCT[AACAACAACAACAAC]AAGCAGGAGTTAAATTCCTCCACCGCGGAGTTCACTCCATCTCGCTGCATCAAGTCGTCATCGCGTTCTTCCAGTTCAAGATCGACGGGACCGGGGGTTGTTGATAATGACTATGC	CGTTAACCCCAATTTATTCCCTA	60.289	GCATAGTCATTATCAACAACCCC	59.627
Unigene18063	TGCTGCTGCTGCTGC	TGC(3*5)	GAAGCTTCCTTTTTCTTCCACTCTGACCTTTTAGTGCATTCTGTTGATATTGTTGTTGCTGCTGCTGTAGTTGTTGCAGTTGCAGT[TGCTGCTGCTGCTGC]AAGTGTTGTTGTGACAACGAAGGCTGCTGCTGGTCTGTCGTCATCTTGAACATA	GAAGCTTCCTTTTTCTTCCACTC	59.894	TATGTTCAAGATGACGACAGACC	59.115
Unigene18109	TCATCATCATCATCA	TCA(3*5)	AATAATGGTCAAATCGAACAGCAACTTCTGCTTCCGCGAAATCATCAGACCCAGGT[TCATCATCATCATCA]CCACCATGTTCAGCATGTCCATTACCACGAACATCATCACCAGACTCATCAACACAAGCACAAC	AATAATGGTCAAATCGAACAGCA	60.715	GTTGTGCTTGTGTTGATGAGTCT	59.32
Unigene18345	GTGTGTGTGTGT	GT(2*6)	CAAAACTTCCTGTAGTGCATGTGTGGCTTA[GTGTGTGTGTGT]AGAAAGGCATGTGCCCTTGTTTCCCATGCGGGGTACCTGCCACTCTTACCTTTTATTCAGCCCACA	CAAAACTTCCTGTAGTGCATGTG	59.724	TGTGGGCTGAATAAAAGGTAAGA	60.01
Unigene18348	TATTATTATTATTAT	TAT(3*5)	GTGTTATCTTGTCGAGCCTTGA[TATTATTATTATTAT]AATTTTCCCTTCAGCCTGACACCAGTACCATATATACTAACGCCCGCACGCATAGATGTTCAGTTGCCCCATGAAGTTCCTGCGCAGCTTCAATCTGCATCGTGTCTTTT	GTGTTATCTTGTCGAGCCTTGAT	59.672	AAAAGACACGATGCAGATTGAAG	60.656
Unigene18457	CCTCCTCCTCCTCCT	CCT(3*5)	GTAAAACACAGCAATCCTTCCACATTCACAGTACTATTCTCATCCCCACCTC[CCTCCTCCTCCTCCT]GATCTTCCTCTTCTTCTTCATCTTCCTCAGCCTCCTTTCTTTTCTTGCTCATATTTTCATTTTCATCCATTTGTACTCAAATTTGCAA	GTAAAACACAGCAATCCTTCCAC	59.926	TTGCAAATTTGAGTACAAATGGA	59.524
Unigene18461	CAGCAGCAGCAGCAG	CAG(3*5)	GGACGGACAAAGTTATGGACATCCACAT[CAGCAGCAGCAGCAG]CACATGCCGGATGGCCAGCCTTATGGGCAACAGCAGATGACAGATGAACATTCTTATGGAACTCCCCCTCGTTCTGCCAACTGAGAAGACAAGTGTA	GGACGGACAAAGTTATGGACATC	61.824	TACACTTGTCTTCTCAGTTGGCA	59.966
Unigene18488	GTCGTCGTCGTCGTCGTCGTC	GTC(3*7)	ATTGCTCATCACTGTGGAAAACTTATCATCGAGAGCCCCAAAACAGTTTTATCAGGTTCATCATCTAGTCGCT[GTCGTCGTCGTCGTCGTCGTC]ATCCCCACTCATATTTGCAAACTGATAAGTCGTAGGTTGTGAAGCTCGTCTAC	ATTGCTCATCACTGTGGAAAACT	60.054	GTAGACGAGCTTCACAACCTACG	60.361
Unigene18496	AGAGAGAGAGAGAG	AG(2*7)	ATATGGGGCAAATACACAAACACAGCTTTCCCAGGGCC[AGAGAGAGAGAGAG]TCCTGTTTTTAGTTTCTTGAATGTCCAGAATGAACAAACTTGACCGAGGCTGTGCACTTCAGAAGCAACTTTGGGTATCTGTCCATATGACC	ATATGGGGCAAATACACAAACAC	59.897	GGTCATATGGACAGATACCCAAA	59.959
Unigene18584	ATAATAATAATAATAATA	ATA(3*6)	ATTATTGCAGGCATGACAAAGAGGGCTGCTGATG[ATAATAATAATAATAATA]ATCAGATAAAGAGCAGCAGCATTGGAGGCCGAGGGCAGTTCCAGCTTCCAGAATGTAT	ATTATTGCAGGCATGACAAAGAG	60.503	ATACATTCTGGAAGCTGGAACTG	59.666
Unigene18586	ATGATGATGATGATG	ATG(3*5)	TATCACTGTCCCAGATCCTGACTTTTATGACTTTGATAAGGATCGCACAGAAGAATGTTTTCAGGAAAATCAGATCTGGGCTGCAT[ATGATGATGATGATG]GAATGCCTCGGTTTTATGCTTCAATTCAG	TATCACTGTCCCAGATCCTGACT	60.009	CTGAATTGAAGCATAAAACCGAG	60.134
Unigene18625	TATATATATATA	TA(2*6)	CAGATGTTGCCTGTCTGAACATAGGATATAGCTCTTTTCTTTATGGGAAACATG[TATATATATATA]GGCATATTATGAAGTCTTTTCATGTGCAGGGGTCCAGGTATTCTGGTACATGTGCTTTCTTGGCTGGTTACCTTAT	CAGATGTTGCCTGTCTGAACATA	60.183	ATAAGGTAACCAGCCAAGAAAGC	60.039
Unigene1864	ATATATATATAT	AT(2*6)	ATTTGTAAAGGAGTTTGCTGCTGCAGCGCTAATGGAGATTTGAGGATACGG[ATATATATATAT]AGATGGGTCCAGCCAGTTATTTTGAGAGA	ATTTGTAAAGGAGTTTGCTGCTG	59.841	TCTCTCAAAATAACTGGCTGGAC	59.776
Unigene1864	CTTCTTCTTCTTCTTCTTCTT	CTT(3*7)	ACAGACTAATTTGGCACTGTGGTGAAGATACTGAGG[CTTCTTCTTCTTCTTCTTCTT]AGCCGGGCATTTGGCGGTGTGATCTCAAAATATTCGACATCACTAGCCCTCCAGAAAAGGGTTCAAATCCAATGAATTTGCCTAGTCCTTGTCA	ACAGACTAATTTGGCACTGTGGT	59.978	TGACAAGGACTAGGCAAATTCAT	60.014
Unigene18735	GTTGTTGTTGTTGTT	GTT(3*5)	CAAAACAGTAGGCGAATTAGCAGCAGGATCGGTACCAGGTC[GTTGTTGTTGTTGTT]GGACTCGGACATCACAAGTACGTGGCTTATCCGTGGAATTAGCGGTGGCCACGTCGCGTTTCTTTGAGAGGACTTCATTGTTAATGGACTTAGCGGT	CAAAACAGTAGGCGAATTAGCAG	60.307	ACCGCTAAGTCCATTAACAATGA	59.912
Unigene18735	GGAGGAGGAGGAGGA	GGA(3*5)	GACATCCCGTCTTCCACAGTTGAACGATCGCTTCCCGTGTTGGCAGGCAATAGCGAAAGGTTAAAGCCCTT[GGAGGAGGAGGAGGA]GGGCCCTTCTTCTTTGTTCTCAGTT	GACATCCCGTCTTCCACAGT	59.969	AACTGAGAACAAAGAAGAAGGGC	60.28
Unigene18737	AAGAAGAAGAAGAAGAAGAAG	AAG(3*7)	ATGTTGCAGAAGGTGAAAGAAAAAGCTAAAAAATTAATC[AAGAAGAAGAAGAAGAAGAAG]CAGCCCGCTGATGGCCACGGAGACGAGCACAGAGAGGAAGAAGAGCACCATCACTTTGATGAT	ATGTTGCAGAAGGTGAAAGAAAA	60.156	ATCATCAAAGTGATGGTGCTCTT	60.018
Unigene18749	AGCAGCAGCAGCAGC	AGC(3*5)	GGTTCCAACTCCAAGAAGAGGCAGA[AGCAGCAGCAGCAGC]CCTCCAATGGAAGAATTAGGCTCCCACCAACCAATTCAAAGCAGGCATCTTTTGAAGATTCATCTCTCAAATCAGCAACCCCAAGGGCGAAGTCCAGCAATCACAGTAAGC	GGTTCCAACTCCAAGAAGAGG	60.096	GCTTACTGTGATTGCTGGACTTC	60.317
Unigene18754	CTCCTCCTCCTCCTCCTC	CTC(3*6)	TTTTAAAACTTGAACATGTGTAATGATACAAATAAATATTTTTTCTTATCAATAAGTCTTGGACTTTAATACTCAACATTAAACATTTA[CTCCTCCTCCTCCTCCTC]TTCTTCCAAACTATATACCATTGCATGACGTTGAGATGTAAAAACACATGC	TTTTAAAACTTGAACATGTGTAATGA	57.115	GCATGTGTTTTTACATCTCAACG	59.571
Unigene18759	TGCTGCTGCTGCTGC	TGC(3*5)	TGCAAGTCTCACAGAGTGGTTTAATGGCGATGGCTGTCGTTTCCGCACGCCTGGCAGAGTGGTACTTTAATGCTGT[TGCTGCTGCTGCTGC]TTGATTTTGAGCTTCATTGGATAGC	TGCAAGTCTCACAGAGTGGTTTA	59.966	GCTATCCAATGAAGCTCAAAATC	59.267
Unigene1879	ATTATTATTATTATT	ATT(3*5)	CCTTGCATTCAATTCATCAATA[ATTATTATTATTATT]ATGCAAATTGATTAAATTTGTGTCATGAATTAATTTATTATATATTTCATTTTATTTTAAAGAAGACGATGTCACAATATTTTTCTTTAATTCCCTTTAATTGGGTGTCC	CCTTGCATTCAATTCATCAATAA	58.992	GGACACCCAATTAAAGGGAATTA	60.284
Unigene18816	CTTCTTCTTCTTCTTCTT	CTT(3*6)	GAAATCGGCGGAGGTAGAAGGCCCTGGGCTCCCAAGTGGAGGACTGGGCGGGCTTTTCAGTGCGGACGGAGTGGGCGCAGGGGCGGAGCCGTGGTGGTG[CTTCTTCTTCTTCTTCTT]GCGTTTGTGATGCGAAGGTGC	GAAATCGGCGGAGGTAGAAG	61.08	GCACCTTCGCATCACAAAC	60.265
Unigene18931	CATCATCATCATCAT	CAT(3*5)	GTCGTCTACATAATCGCCAAGAC[CATCATCATCATCAT]CTTTTTCTTCTTGAGCATCATCATCCTCTTCATCCGAAGAGAATTCCAGCGTTTCTACAATATCATCC	GTCGTCTACATAATCGCCAAGAC	60.041	GGATGATATTGTAGAAACGCTGG	59.877
Unigene18973	TATTATTATTATTAT	TAT(3*5)	CTCTGCCAATTGCAAGAACTATTATTAATAG[TATTATTATTATTAT]TCTTGATATTATGATACCCTCTGCCGGCTCTAACGACAGCCTCTAAACCTCC	CTCTGCCAATTGCAAGAACTATT	59.806	GGAGGTTTAGAGGCTGTCGTTAG	60.641
Unigene19014	TATATATATATA	TA(2*6)	GCCTCTGTCTATCTTGCTTCAAAC[TATATATATATA]ATAATTATAGCACTGTCGAGTCATAATGCTGTGTATTTGGAAGCAAT	GCCTCTGTCTATCTTGCTTCAAA	60.035	ATTGCTTCCAAATACACAGCATT	59.917
Unigene19032	ATGCTCATGCTCATGCTCATGCTC	ATGCTC(6*4)	TGAAACATAATAACCCAAATCGGTGGCAAGCTCCTCCTTGTTCTCGAAAACTCTCATCGCACCGTTACCTCTCTTGTCATTACTAGTCTTTAACCCCACTGAG[ATGCTCATGCTCATGCTCATGCTC]CTGCTCATGCTCCTTCCCCCTTTCTATAACT	TGAAACATAATAACCCAAATCGG	59.961	AGTTATAGAAAGGGGGAAGGAGC	60.317
Unigene19154	ATATATATATATATATATATAT	AT(2*11)	GTGTGCCCAACTTAACATCAAATATATAATC[ATATATATATATATATATATAT]CCTTTTTCTGCTGCTCCTATGCAATCAGCGCAAATCCTTTGAAAAATTCTT	GTGTGCCCAACTTAACATCAAAT	60.163	AAGAATTTTTCAAAGGATTTGCG	60.76
Unigene19167	GCAGCAGCAGCAGCA	GCA(3*5)	ACCTCCTCCTTTCTCCCAAAAAAACTCAACGTCGGACGGAGCTTCGGTGAGGCGAAGCGGTCCATGGTACCTTGGCG[GCAGCAGCAGCAGCA]GCTGAGGTTCACAGCGCTGTCTATGAATGCCGGAAGTT	ACCTCCTCCTTTCTCCCAAA	60.045	AACTTCCGGCATTCATAGACAG	60.503
Unigene19256	TTCGTCTTCGTCTTCGTCTTCGTC	TTCGTC(6*4)	GGTCTCCTAGGGAAATGTTCTGAGAACTCCAACGCGAGCACAGAGGCGTCGTCGTCCTCTTCGTCGGCTGCTCTTGAAAAAAGTTCGTTGTCGCA[TTCGTCTTCGTCTTCGTCTTCGTC]GGCTCTTTTTGAGAAAAGCTTGTCGTCG	GGTCTCCTAGGGAAATGTTCTGA	60.825	CGACGACAAGCTTTTCTCAAA	60.54
Unigene19292	CTCTCTCTCTCTCT	CT(2*7)	GAGCAGAGGGAGGTTCTTAACATAGATGGAAGTATCTTCTATCTTGGTATTTCCGATGTACC[CTCTCTCTCTCTCT]TTCATATTTATTTTCAGTTCCTTTACTTAGGCACTATTGTTTTTTGGTTCCTTATTGTTATAAAAGACTGCCTGCTCTGAGTT	GAGCAGAGGGAGGTTCTTAACAT	60.142	AACTCAGAGCAGGCAGTCTTTTA	59.725
Unigene19306	GTGGTGGTGGTGGTGGTG	GTG(3*6)	AGATCGATTTCCTCCTCCATTTCCCTCACCACCAA[GTGGTGGTGGTGGTGGTG]CCTCTGCGCCTGCCGGAGCAGATTCATGTCGTCCATTGACGAATTCATATTCATATTCATCTCATCTGCAGCAA	AGATCGATTTCCTCCTCCATTT	60.277	TTGCTGCAGATGAGATGAATATG	60.245
Unigene19393	ATATATATATAT	AT(2*6)	TTGCCAAAAACAAGAAGAATCATATATACAAATAC[ATATATATATAT]AAAACGCAAACAACCAATCGAACCCTGAAACCAAACCCTAGGTTTGAAAGCAAACCCTTATTAGCT	TTGCCAAAAACAAGAAGAATCAT	59.997	AGCTAATAAGGGTTTGCTTTCAA	58.585
Unigene19400	TGATGATGATGATGA	TGA(3*5)	TCGTGTTAAGACTCTGCATCGTAAATTTGAACCAGATCAGCTAAATGAAATGGATTTCAAGGCTTATTTGGCATCAGATGATGAAGTATCTGATGG[TGATGATGATGATGA]TCACAGTCAAGAAAATGGAGAGGATG	TCGTGTTAAGACTCTGCATCGTA	59.955	CATCCTCTCCATTTTCTTGACTG	60.116
Unigene19482	GTGGTGGTGGTGGTG	GTG(3*5)	CTCCCCATCTTTATCTTCTTCGTTTTGTTCTTCTGCAGGATCCTGATTTT[GTGGTGGTGGTGGTG]GCGGTGGAGGAGGCTGGTTCTGTTTTTCCGGTGGATTTTCATTAACTGTGGAACGAGGT	CTCCCCATCTTTATCTTCTTCGT	59.978	ACCTCGTTCCACAGTTAATGAAA	59.92
Unigene19518	ATATATATATAT	AT(2*6)	ATCAGTTGATTCATTCATGGCTTTCTACTCAATTCAGAAATAAGG[ATATATATATAT]GTAAAAGAAATCCACAAGGAAGTACGTTATGTTGGCTGTAGCATCTCTCTGAGAGGAAATGAAATCACACAGCACAAGATTGTTG	ATCAGTTGATTCATTCATGGCTT	59.855	CAACAATCTTGTGCTGTGTGATT	60.088
Unigene19671	TGTGTGTGTGTG	TG(2*6)	GAGCACTGTTTATGACTGGCTCTGTCGGCTATGTGAGGATGCTGTATGTGCTGCTACGTCTGGTGCTTATTGTGAATGTTGGGTA[TGTGTGTGTGTG]AGTAGTGTAGCTCAATGTGTATCTGTGGTAACGC	GAGCACTGTTTATGACTGGCTCT	59.963	GCGTTACCACAGATACACATTGA	59.94
Unigene19685	GATGGATGGATGGATGGATG	GATG(4*5)	ACAAATGTGAAATGTGAAACGTGACGTGAGTGACCACTTCCTTTT[GATGGATGGATGGATGGATG]AACATTCAATTCATACACACAATTTCATCTTAAACCGCAATAATAATAAGGTAAGGTACCCCCGC	ACAAATGTGAAATGTGAAACGTG	59.821	GCGGGGGTACCTTACCTTATTAT	60.631
Unigene19751	GAGGAGGAGGAGGAG	GAG(3*5)	AAATCTCGGAAGGCAACTCTTAGCAGGCAGGGCGTCCTCTCGGCATCCGACAGGCCCGCAGCTTCCCCGGCTTCGAACGGC[GAGGAGGAGGAGGAG]AGAAACGAGCTGCGAAGGAATCGTTTTCACGACC	AAATCTCGGAAGGCAACTCTTAG	60.255	GGTCGTGAAAACGATTCCTTC	60.851
Unigene19824	CATCCCATCCCATCCCATCC	CATCC(5*4)	CATCTCCTCTCTCCTCTCATTCACTAGT[CATCCCATCCCATCCCATCC]CATCGCGTTCGCCTCTATCTTTTATCCCGCAACGAGGGATCGAATCGCACAGTGAGCGAGTCGCGGGCGAGGGAAGTGGGGAATAAGCGCTGTTAACGTCTTCTTGTTTC	CATCTCCTCTCTCCTCTCATTCA	59.965	GAAACAAGAAGACGTTAACAGCG	60.333
Unigene19880	CTTCTTCTTCTTCTTCTT	CTT(3*6)	CTTCCATTGACTGAGCTTGATCTG[CTTCTTCTTCTTCTTCTT]CCATTTCCGGAACGCCTGTTGGAGTTTCTGAGATTAGGGGAT	CTTCCATTGACTGAGCTTGATCT	59.899	ATCCCCTAATCTCAGAAACTCCA	60.315
Unigene19910	AGGAGGAGGAGGAGG	AGG(3*5)	TCTGGAATTTAGCTCAACAGCTCCGTTTTTACCAGCCCCCGCACGCACCGTGGTGCAGTGACGATGACGCCGACGAAAGTGGGGA[AGGAGGAGGAGGAGG]GGTTTCGTCGCACCTGGGGGTGCTGGAGTCCGTCGCGGTTTCTTCTAATTCGAACCTT	TCTGGAATTTAGCTCAACAGCTC	60.035	AAGGTTCGAATTAGAAGAAACCG	60.014
Unigene19919	GAGGAGGAGGAGGAG	GAG(3*5)	CATTATGGGCATTCACAGAAAGTTGCTGCTGCTCCTTTGCTTCTGTGTGACCTTTGCGAGGAA[GAGGAGGAGGAGGAG]GCAGCATTTCTTTATTCAGGTGCCTCTTAGAATGCCCATCTGCAGTATT	CATTATGGGCATTCACAGAAAGT	60.25	AATACTGCAGATGGGCATTCTAA	60.003
Unigene19954	GGAGGAGGAGGAGGA	GGA(3*5)	AGAGGAAGAGCCTGAGGAAGAGCCAGAGGAGGAGCC[GGAGGAGGAGGAGGA]AGAGGAGGCAGAGGAGCTTGCAGATGAAGAAGAGGAGCCAGAGGAAGAAGAGGAAGCAGAAGCCATGGAGACAGAAGCAGGTGAACCTTTACCAAAT	AGAGGAAGAGCCTGAGGAAGAG	60.633	ATTTGGTAAAGGTTCACCTGCTT	60.274
Unigene19970	GGAGCCGGAGCCGGAGCCGGAGCC	GGAGCC(6*4)	GCAGCAAGCTAATCAGAAGAAGAAGAAAGAGCAGGAGCCAGAACCGGAGCCGGAGCAGGAACAGGAGCA[GGAGCCGGAGCCGGAGCCGGAGCC]GGAAGAGGAGGAGGGTACGAAGAAAAGCCCAGAGAGCAGCAGTGATCATGAG	GCAGCAAGCTAATCAGAAGAAGA	60.29	CTCATGATCACTGCTGCTCTCT	59.775
Unigene19975	TCTCTCTCTCTC	TC(2*6)	AGAGATGCAACAGTGACTTCCTCAGCAACAA[TCTCTCTCTCTC]CTTTTACACTCTCATCTTCCACTTTGAGATCTGATAAAGCCAATGTTACTGAAGGTAGTCCTGCACTAAGGTCATCCTTTGTAGTGTCCAA	AGAGATGCAACAGTGACTTCCTC	59.937	TTGGACACTACAAAGGATGACCT	59.914
Unigene20068	TGGTGGTGGTGGTGG	TGG(3*5)	AACTAGCAGTAGCATCGAACAGGCAATCAGAGGATAGAAGGCTGCAGAT[TGGTGGTGGTGGTGG]GGAAATGGGTCATGGTGGTGGTGGTGATCACATGTTAGGATT	AACTAGCAGTAGCATCGAACAGG	59.982	AATCCTAACATGTGATCACCACC	59.997
Unigene20068	CAGCAGCAGCAGCAGCAG	CAG(3*6)	GATCAATATTTCAGGTGCAGGAATGGGGCTTGAGTTCCAAGGTGGCCGCTTGAGTCATGTCCCCCTAGGTTCCATGTTGCTACAA[CAGCAGCAGCAGCAGCAG]CATAGCTCCCATCAGTTACCAGGA	GATCAATATTTCAGGTGCAGGAA	60.326	TCCTGGTAACTGATGGGAGCTAT	61.198
Unigene20129	ATAATAATAATAATA	ATA(3*5)	TAGCATGTTGGTTTCCAACTTTTGGTGGCCACTGCTGCGTTCATCACTGTCACCGGGCGATGGTATTAATAATATTAATATTGATAATAAGG[ATAATAATAATAATA]TAGAGCGAGGCAAGCCGTTCAGGAGGAGGAATTCAGTAGCACCAAG	TAGCATGTTGGTTTCCAACTTTT	59.926	CTTGGTGCTACTGAATTCCTCCT	60.995
Unigene20138	CTGCCTCTGCCTCTGCCTCTGCCTCTGCCT	CTGCCT(6*5)	CGAAATGCTGAAAGTTTGACTCTTCTTCTTCCTCTGTTTGTTAACGTTGGCTGCAGCGGCCG[CTGCCTCTGCCTCTGCCTCTGCCTCTGCCT]CTGCTGCTGCTCTTTCTTTCTGTTCGGCCTCT	CGAAATGCTGAAAGTTTGACTCT	59.941	AGAGGCCGAACAGAAAGAAAG	60.005
Unigene20232	GCGGCGGCGGCGGCG	GCG(3*5)	GACCTGAAAAAGCCTCTAGTCGTCTAGAAGCCCGCC[GCGGCGGCGGCGGCG]GGCCGCCGTGGTTACTGTGTTCACAAAAG	GACCTGAAAAAGCCTCTAGTCGT	60.299	CTTTTGTGAACACAGTAACCACG	59.627
Unigene20240	TCTTCTTCTTCTTCT	TCT(3*5)	CTGCACCTCAAAGGGTTACTGA[TCTTCTTCTTCTTCT]TATGCTCGCTACTCCTCCTGTGTGCCCCATTCTCTTCCCCTCATCCCAAGGAAAGACGACGAAGCCACCCAAAAGCGAGAAGCTAAACCCTTCTCTTCCTCCACTC	CTGCACCTCAAAGGGTTACTGAT	61.742	GAGTGGAGGAAGAGAAGGGTTTA	60.115
Unigene20421	CATCATCATCATCAT	CAT(3*5)	TCCTCTTCACCAGTACCATCACTACTCTCAGATTCATCACCACTGA[CATCATCATCATCAT]CACTTACTTCTGCAAACTCAGACAAAGAGAGTGTGTCAATCCCAAGATC	TCCTCTTCACCAGTACCATCACT	60.045	GATCTTGGGATTGACACACTCTC	59.994
Unigene20464	TTCTTCTTCTTCTTCTTC	TTC(3*6)	TTCTTTCTTTTCTTCTCCGATCCGGCAAATTCCTCTGCTTCGGGTGCTTGCTTCAACAGATCAACTTCCATTTGGTCTGTT[TTCTTCTTCTTCTTCTTC]TTTTCACTGTCAAGTTTAGGCATGTCACCATTTTCCTTCACAGAATTTTG	TTCTTTCTTTTCTTCTCCGATCC	60.186	CAAAATTCTGTGAAGGAAAATGG	59.865
Unigene20465	TTCTTCTTCTTCTTCTTC	TTC(3*6)	CCTATTTTGAGCATTGTTTTGCTCCTCAATCCCTGGTCTTGCGGCAACTGAGTT[TTCTTCTTCTTCTTCTTC]TGCTTCATCTTTGAGGATTGTTTTTGATACTGGCTGTTTTCTCCGCATTCTATCCTGCAGTTTATT	CCTATTTTGAGCATTGTTTTGCT	59.692	AATAAACTGCAGGATAGAATGCG	59.677
Unigene20465	TTCTTCTTCTTCTTCTTCTTC	TTC(3*7)	TTTCAAATTCTTCTGCATTTTCCCGGATATCCACTTTGACTTTCCTCTCTGGCACTGTGGCATTTTTGTT[TTCTTCTTCTTCTTCTTCTTC]CTTCTCAACTTTGAATATTACTTTTGATGCCTCCTTTCTTCCCTTTGTTTCAGTC	TTTCAAATTCTTCTGCATTTTCC	59.616	GACTGAAACAAAGGGAAGAAAGG	60.482
Unigene20468	GATGATGATGATGAT	GAT(3*5)	ATGACGAAATTCCAAAGTTCAAAATCTAATGCACTCTTTGAC[GATGATGATGATGAT]TTATTTGGAGACTCGATGGAGGACGATGCTTCAAGATGAGTCTAGCTATTTAACTTTATATTGAAGTATAATTCACGATTTCAAGGAATTTGAGGTCAGAA	ATGACGAAATTCCAAAGTTCAAA	59.871	TTCTGACCTCAAATTCCTTGAAA	60.095
Unigene20585	AATAATAATAATAAT	AAT(3*5)	AATTGCTTCTGCCATTACTCTTGCAGCCGTTGTTGGCAGTTCTGTTGTTACAGTA[AATAATAATAATAAT]AGAAGTTCAGAGGAGAAAGACACGCTTCCGTTGCGATATGATCCAGAAGCTATCGCTGCATATTTT	AATTGCTTCTGCCATTACTCTTG	59.806	AAAATATGCAGCGATAGCTTCTG	59.923
Unigene20634	CTCTCTCTCTCT	CT(2*6)	CTTCTTAAATGAAGATGCCTTCGTTAAAATATG[CTCTCTCTCTCT]CCCCTTCTCAGACACCCTTGAAACCCCTTTCTCAAAGGGCTCAGGTCTTGATTCTTTCATG	CTTCTTAAATGAAGATGCCTTCG	59.424	CATGAAAGAATCAAGACCTGAGC	60.256
Unigene20699	TAATAATAATAATAATAA	TAA(3*6)	AGAGGAGCAATTCAGGAGGTCAGAGCGGGCATAC[TAATAATAATAATAATAA]TTCGGCGAACCAGCAGAGCCCCGGAGAGCAGCAGGACTCGGACGATGCCACCGACGAGGAAGCCGATGAAGGCTTGCCCACAGAGCGGACTAGCATAGCAAAG	AGAGGAGCAATTCAGGAGGTC	59.832	CTTTGCTATGCTAGTCCGCTCT	60.189
Unigene20710	AGAAGAAGAAGAAGA	AGA(3*5)	CACAAGTGGTAGAGGAGGAACACGATACCCCTTTGGCGCAAAC[AGAAGAAGAAGAAGA]GGCCCCCCCTGCATCAGGACTTTTAGAAGGCGAAG	CACAAGTGGTAGAGGAGGAACAC	60.081	CTTCGCCTTCTAAAAGTCCTGAT	60.255
Unigene20725	TGCTGCTGCTGCTGCTGC	TGC(3*6)	CTGAAGAGCAGTTATTGGCAAGTGG[TGCTGCTGCTGCTGCTGC]AAACTAGAAGGAACTTGCTGCAGTGCTGGGCTAACATGCGGCTGCATTTGAGGCTGAGAAACTGGTGGTTGGCCATATACTGGCAATGACTGTTGTGATGAGGATAACTGACCAA	CTGAAGAGCAGTTATTGGCAAGT	59.961	TTGGTCAGTTATCCTCATCACAA	59.485
Unigene20759	TTCTTCTTCTTCTTC	TTC(3*5)	AGCACGATCCAACCAAGTATGTCATACTTCAAATCACTG[TTCTTCTTCTTCTTC]GAACCCTTCAAATTAGATCCAGCCGATGAGCCACCAGATTGAGGATTGAACATT	AGCACGATCCAACCAAGTATGT	60.802	AATGTTCAATCCTCAATCTGGTG	60.235
Unigene20893	GCCGCCGCCGCCGCCGCC	GCC(3*6)	TGTGAATAACTCCGAGATGGTCTTATTTTTGCAGTCTGTTGCCTTTGCACATAATATCTTTTTGAACTTCGTCTCCTCATTTTCGTCT[GCCGCCGCCGCCGCCGCC]GCTGCAGCTTCGATACAGCAAAACCATGATGACA	TGTGAATAACTCCGAGATGGTCT	60.012	TGTCATCATGGTTTTGCTGTATC	59.881
Unigene208	CTTCTTCTTCTTCTT	CTT(3*5)	GAATGAGCCTTGCTCTCTTGTAACCCAATAGAAATATGCATTGGTGGTTTGCATGGA[CTTCTTCTTCTTCTT]GGGACTTGTTATGGGATAATCATGCTTGCCTTTGCTGGGGCTCTCAGTGAAGGACTTGCTGCTAT	GAATGAGCCTTGCTCTCTTGTAA	60.035	ATAGCAGCAAGTCCTTCACTGAG	60.089
Unigene20921	TCATCATCATCATCA	TCA(3*5)	ACAGCTTTGTCTATTCCCAATGAATTAACAGCATTGACAAATTGTTGATGCAACTCCACTGACCAAACAACTCTTGGCTTTTTTGATGTTGAAGGGTCTTCCATATCATGT[TCATCATCATCATCA]TCCTCGTCATCATTTTGTTCTTTC	ACAGCTTTGTCTATTCCCAATGA	60.014	GAAAGAACAAAATGATGACGAGG	59.994
Unigene20981	CATCATCATCATCAT	CAT(3*5)	AGGGTTTGAACCCATGATAAAATTCCCCCCATTGTTCCAGACCTTATAAGTTGGAGGAGGGGGAGGTCCTGGATTGTTATGGCTCTTATCCCCCTGACC[CATCATCATCATCAT]AATCTACACAAAACCAATACTCAGGTTTTCAGAACCAATTTG	AGGGTTTGAACCCATGATAAAAT	59.847	CAAATTGGTTCTGAAAACCTGAG	60.022
Unigene21053	GAGGAGGAGGAGGAG	GAG(3*5)	TCTGAGTACTCTTCCTCGGTCTGCTTCTACACCTAGAGCCAGCGT[GAGGAGGAGGAGGAG]AAACAAGAGAAATATATCTAACATGCCGAATTCGGCTGCTGAAGAGAAAGCATATGAGCAGA	TCTGAGTACTCTTCCTCGGTCTG	60.06	TCTGCTCATATGCTTTCTCTTCA	59.261
Unigene21059	GAAGAAGAAGAAGAA	GAA(3*5)	AAAACTTAAAAAGGGCCTTGAAATCGCCAATGGTAGCGAGTCCGTTAGAAGATCTTCTCGCCTGCAGAAGGCC[GAAGAAGAAGAAGAA]GTCCGGGCTCCTCCTTCTCCACCCCGTACAGAAACTAGGAGGAAACCTTTAAGCTCGAAAA	AAAACTTAAAAAGGGCCTTGAAA	59.582	TTTTCGAGCTTAAAGGTTTCCTC	60.232
Unigene21098	ATATATATATAT	AT(2*6)	AGTGCCCTTGAGCATTTGATTAATCCATTAGTTTCATATTCTGTAAGTTTAGCATAATGGCATTAATGCTGCTTCATATTAGAGATAAGCAGACAATGTTTGTCTAAA[ATATATATATAT]AGGTATGGATCAGCAGATCTGTTT	AGTGCCCTTGAGCATTTGATTA	60.976	AAACAGATCTGCTGATCCATACC	59.5
Unigene21207	TCTCTCTCTCTC	TC(2*6)	GGTTGCCCTTTCTACAGCTACTCTATCTT[TCTCTCTCTCTC]TTTCTCTTTCCCGTTCTCTTTCCTTTTCACGTTCCTTTTCCCTTTGTCTTCTCT	GGTTGCCCTTTCTACAGCTACTC	60.65	AGAGAAGACAAAGGGAAAAGGAA	59.764
Unigene21285	ATCATCATCATCATCATCATC	ATC(3*7)	CCTCTTTCCTCGAGTTGGATACTTTCTTTTGCCATCACT[ATCATCATCATCATCATCATC]TTCCTCGTCATCATCACTAATGCTTACATCTTCACTGTCATCAGGTCTCC	CCTCTTTCCTCGAGTTGGATACT	60.135	GGAGACCTGATGACAGTGAAGAT	59.619
Unigene21286	TTATTATTATTATTA	TTA(3*5)	CAGAGCTCATAAAGCCTCTGAACCGCACTCTTC[TTATTATTATTATTA]CTATTATTCAAACCCTTAACGGCCGAGGGTTTCCTGTTCCGTTCAAACCCTTGTGTGGGTTCGCCATTTTCTGCAGACTTTATCCGT	CAGAGCTCATAAAGCCTCTGAAC	59.688	ACGGATAAAGTCTGCAGAAAATG	59.68
Unigene21301	AAGAAGAAGAAGAAG	AAG(3*5)	TGAATCTATGACCTCCAAGAGGAAATTGTCCAAGGAGGCCGTAGGTGATGATTCCAGTCCCAAGCGCAGC[AAGAAGAAGAAGAAG]ACATGGGGCAGCGATGTCGAAGAGGAAGAAGAAGAGGAGAAGGAAGAGAAGGAAGAGA	TGAATCTATGACCTCCAAGAGGA	60.082	TCTCTTCCTTCTCTTCCTTCTCC	59.608
Unigene2133	GGAGGAGGAGGAGGA	GGA(3*5)	CAAGCCAATTCTCAGAAGGTTACTGTAGCGAACCAGCAATACGTGCAGCAGAGC[GGAGGAGGAGGAGGA]CACAAGGGGCCGAATTTATCTTTATCGTCGTCATCTGTGGGAATGAGTTTGT	CAAGCCAATTCTCAGAAGGTTAC	59.317	ACAAACTCATTCCCACAGATGAC	60.282
Unigene21355	TATATATATATA	TA(2*6)	ATTTAGTGTTGAATCTTGCCCCTTGAAGGGTTGGTTCTGGTTCTGGTTCTGTGGTGGTGGAGTGTGTG[TATATATATATA]CATACACACGCTTTCAACCCAGGGACTTCGCCTTCAGACTATGTA	ATTTAGTGTTGAATCTTGCCCCT	60.243	TACATAGTCTGAAGGCGAAGTCC	59.797
Unigene21402	CTGCTGCTGCTGCTGCTGCTGCTG	CTG(3*8)	CTGTGCAAGGCTTCTCTTCCT[CTGCTGCTGCTGCTGCTGCTGCTG]GGATGAAGAACTGGTGCTGGCGGGTTTCGATGAGGGAATCGACGATATGGGCCTGGGTATTGCTCCGTTAAAATT	CTGTGCAAGGCTTCTCTTCCT	61.07	AATTTTAACGGAGCAATACCCAG	60.564
Unigene21403	CTGCTGCTGCTGCTGCTG	CTG(3*6)	AGACTGGATGGAACGCTGTAGATCGGCATGGCGGAAGGATCAGGGAT[CTGCTGCTGCTGCTGCTG]CGCCGCCGTCAGAGCCGCTGATTGGGAGAGTCCCCCAGGGGGCTGGAGCTGCATTGGCATCGGACCCTCGTCCTCATCTAGCGGCAGACGTT	AGACTGGATGGAACGCTGTAGAT	61.396	AACGTCTGCCGCTAGATGAG	60.559
Unigene21528	GACGACGACGACGAC	GAC(3*5)	AAGAGGATGAAGAATCGGAAGTCGAGATGCTGAGCATTTCATCGGAG[GACGACGACGACGAC]TTGCCAAGAAGAGGATCGTCGTCTCAGTTGAGGAC	AAGAGGATGAAGAATCGGAAGTC	60.089	GTCCTCAACTGAGACGACGAT	59.32
Unigene21572	TTATTATTATTATTA	TTA(3*5)	AGCTGATGAGTAAGCTTCCAAGATATTATCACTATGATTG[TTATTATTATTATTA]CCTTGATTGAGATTATTACTACCAGTCTGCAATCCATCAT	AGCTGATGAGTAAGCTTCCAAGA	59.688	ATGATGGATTGCAGACTGGTAGT	59.906
Unigene21587	GCAGCAGCAGCAGCA	GCA(3*5)	ATTTCTGGCTGAATCTGTAGTGGCG[GCAGCAGCAGCAGCA]AGAGCACGATGCCTTTCTGTTCTGACTGCCAAACTATTCTTTTCACATTCCTTTTGAAGTGAAATGGTGTCTACATGCCCATCTTTGTTGCCTCTAGACTGTGAGGCAGATAATGCTC	ATTTCTGGCTGAATCTGTAGTGG	59.666	GAGCATTATCTGCCTCACAGTCT	59.927
Unigene21695	CAGCAGCAGCAGCAG	CAG(3*5)	GAATCATTTTGCTCCACAAGAAGGATATGGCCATGCCCCTTTGTTTCGTGACGACTCTGTCACCCGATTC[CAGCAGCAGCAGCAG]GCTCGTTTGGGGTCCTCAGTCATTCCCCATGCCCCCGTGCATTCGTCGTATGAATGGCCCCCTAAAAG	GAATCATTTTGCTCCACAAGAAG	60.122	CTTTTAGGGGGCCATTCATAC	59.688
Unigene21709	TCTTCTTCTTCTTCT	TCT(3*5)	CCTTGACATCCTCAAAGTGTTTTGTTTTGGGA[TCTTCTTCTTCTTCT]TTGGATTGATGATGACTACTGCTGCTTTTACTTTGTTCGAGAC	CCTTGACATCCTCAAAGTGTTTT	59.552	GTCTCGAACAAAGTAAAAGCAGC	59.615
Unigene21730	GAAGAAGAAGAAGAA	GAA(3*5)	ATTTCAATGAGAAGAATGCCAGAGGAG[GAAGAAGAAGAAGAA]AAAGGCGGTAAGGGAAGTTATTCAGGCTCTTTAGTATTGTTATTTTCACCACCGGA	ATTTCAATGAGAAGAATGCCAGA	60.089	TCCGGTGGTGAAAATAACAATAC	59.997
Unigene21764	CTCCTCCTCCTCCTC	CTC(3*5)	CCCCTTCTCCTCCTGTATCTG[CTCCTCCTCCTCCTC]CTAGTGCTCCTAGTACTAGGACTAGTAGTACTAGTGCTACTAGCTCTGCAGTTGTGTCAGG	CCCCTTCTCCTCCTGTATCTG	60.074	CCTGACACAACTGCAGAGCTAGT	61.042
Unigene21810	CTGCGGCTGCGGCTGCGGCTGCGG	CTGCGG(6*4)	TTTTCATACAAAAATGTCTCGGGACTTAACTCAAGTCGACTCCACTGTATTCGATCCGTGGCTTTCCTTTA[CTGCGGCTGCGGCTGCGGCTGCGG]CTCCTGCTCAAAACGGGTCTCAGCACGCTGCTCCTTTCTTTCGTGTGATTACCCAA	TTTTCATACAAAAATGTCTCGGG	60.219	TTGGGTAATCACACGAAAGAAAG	60.381
Unigene21916	TGCTGCTGCTGCTGC	TGC(3*5)	CAGAAGCACCCTTGAGATTAAGATCAGGAATTTTATTGTATGGCCCCCCTGGGTGTGGGAAAACCCACATTGTTGG[TGCTGCTGCTGCTGC]CTGTTCTTTGCGATTTATCTCTGTGAAAGGACCTGAGC	CAGAAGCACCCTTGAGATTAAGA	59.9	GCTCAGGTCCTTTCACAGAGATA	59.899
Unigene21935	TCCTCCTCCTCCTCC	TCC(3*5)	GCAGCTCGAATCACTGTATTCTTCCTCTTCTTCTGCATCTCGCCAGTCCTCT[TCCTCCTCCTCCTCC]TCGCAAGAACCAAATTCTTCCCTGTCAG	GCAGCTCGAATCACTGTATTCTT	59.933	CTGACAGGGAAGAATTTGGTTC	59.976
Unigene21960	CAGCAGCAGCAGCAG	CAG(3*5)	TGAAGAACAATCTGGAAGAAACCGTCGCAGTTTTTCCCTCTTTTGATCCCAAAATCAAACCCTTGTCCGATCATGGCGAGATGAGAACTCC[CAGCAGCAGCAGCAG]CTTACTGTACACAAATGGCGGGCTGCCAATGAACTATAATAA	TGAAGAACAATCTGGAAGAAACC	59.623	TTATTATAGTTCATTGGCAGCCC	59.412
Unigene21963	GAGAGAGAGAGA	GA(2*6)	ACACAAAATCCCGAAGTCATAAATGCT[GAGAGAGAGAGA]AAGAGCCAGCCAGCCATGTTTCTTTTTGATATGCAGAGAGAGCGGTGGGGTAGGTGGAGGAAAGCGCAATCTGCATTGGACCATTTAAACATT	ACACAAAATCCCGAAGTCATAAA	59.765	AATGTTTAAATGGTCCAATGCAG	60.121
Unigene21985	ATATATATATAT	AT(2*6)	GTCATTTGTTTGATCAGGGTCATTG[ATATATATATAT]CTTGAATTCTCTTCACTTATTTCCCTCTGTGAGCTTCCTAGGGCATCTGATTCGGTTCCTCTGGAACCATTCCTCTTTGGAAAGCCCTGTTCTGATTTTGTTTTCTG	GTCATTTGTTTGATCAGGGTCAT	60.11	CAGAAAACAAAATCAGAACAGGG	60.022
Unigene22003	CTTCTTCTTCTTCTT	CTT(3*5)	TAGTAGAAACTTGTCGAGGTCG[CTTCTTCTTCTTCTT]TCTTGCTGGCTCACCAACAGGAAACTTCTGTTGAACTTCTTCCTCAACCAT	TAGTAGAAACTTGTCGAGGTCGC	59.961	ATGGTTGAGGAAGAAGTTCAACA	60.026
Unigene22284	ATTATTATTATTATTATTATTATTATTATTATT	ATT(3*11)	AATGGACTCTTTGTTTTCCTGTGC[ATTATTATTATTATTATTATTATTATTATTATT]ATGGAGATATTTGGCCAGATAACCAGAGCCAGCAGCGGCCAGAATCATCCACATCTCCATCTTTCCCTAATTGTCCTGTTCCT	AATGGACTCTTTGTTTTCCTGTG	59.552	AGGAACAGGACAATTAGGGAAAG	59.888
Unigene22342	CACCACCACCACCAC	CAC(3*5)	AAACACAAGCACCGCCATCACCACCACCGTCACCGCCAT[CACCACCACCACCAC]CCGCCAGCCCCTGCTCCGTCACCGCCCGCACCACCCCTTGCTCCTCAGACTGCTGATAAT	AAACACAAGCACCGCCAT	60.12	ATTATCAGCAGTCTGAGGAGCAA	60.407
Unigene22368	AGCAGCAGCAGCAGC	AGC(3*5)	TGGAATCTCTCAATCCTCGACTAAGAACAACCTTAGTTAGAATAACACAAGATTTGCAAGAGCAAAGGCCAAAATTACA[AGCAGCAGCAGCAGC]TGCTCCAGCTTCAACTAATAGTTCCTTTTTCCAAGTTGAAGTTTCA	TGGAATCTCTCAATCCTCGACTA	60.214	TGAAACTTCAACTTGGAAAAAGG	59.669
Unigene22378	AGAAGAAGAAGAAGA	AGA(3*5)	GCCCATCTTTGACTATTACGGTTAATGGTATTATCATAATTTAACTGACC[AGAAGAAGAAGAAGA]ACCCCAGGAAAAGCTGGAGACATATTTACTCTGCGC	GCCCATCTTTGACTATTACGGTT	60.587	GCGCAGAGTAAATATGTCTCCAG	60.29
Unigene22379	ATATATATATAT	AT(2*6)	CAGATTGCACAAAAAGAACTGCCGATCATGTGGCAGAGAATATGCAGATACATGTAG[ATATATATATAT]AGAATAGGCTGAAATAAGAGGAGTAGCAGATAAGAAGACAGCGAAAAGCGCCCATCCTAGGACGGATCAGTACCTTCTTCAGGCCTTC	CAGATTGCACAAAAAGAACTGC	59.926	GAAGGCCTGAAGAAGGTACTGAT	60.142
Unigene22554	CATCATCATCATCAT	CAT(3*5)	GTTGCTGCATTTTACGAGAACTTCGAGATGGATGGGGGAATGGGCATGAGTCGCGGGATGATGATGCCGCCCAGGATGCATAGACGGCGAAGGCCTGAG[CATCATCATCATCAT]CACCACCATCATCACATGCAGATG	GTTGCTGCATTTTACGAGAACTT	59.847	CATCTGCATGTGATGATGGTG	60.986
Unigene22554	TTCTTCTTCTTCTTC	TTC(3*5)	GGTATGCAGTTGGCAGATTCTCGACACCTCCCCCTGTTGGCAGGAG[TTCTTCTTCTTCTTC]TATGATTTTCAACAGAGGGCTTGGTGGCTCAGATTCAGGTAATAACACAAGTGGAGAAAGCCA	GGTATGCAGTTGGCAGATTCTC	61.017	TGGCTTTCTCCACTTGTGTTATT	60.048
Unigene22621	GGAGGAGGAGGAGGA	GGA(3*5)	TGGAGAAATTGAGATGAATGGACGGCAACTGCAATTGCGGGCGAAGGGAAGGGAGGTTCAAGGAATGGC[GGAGGAGGAGGAGGA]GCAATTGCAATGTGTGGGCAGATTCGAGGTTCAAAAGCATA	TGGAGAAATTGAGATGAATGGAC	60.313	TATGCTTTTGAACCTCGAATCTG	60.601
Unigene22680	AAGAAGAAGAAGAAG	AAG(3*5)	AGAAGCTACCCGGACACTCTAACAAGAAGGAAGGGGAAGGGA[AAGAAGAAGAAGAAG]CAGAAGTGGCGAAAAAGGCGAGTCTGATCGATAAAATCAAAGAGAAACTCCCCGGACATCATACCAAGAAGGAAGGAGAAGAGGAAG	AGAAGCTACCCGGACACTCTAAC	60.194	CTTCCTCTTCTCCTTCCTTCTTG	60.002
Unigene22682	AGAGAGAGAGAG	AG(2*6)	TGTAGAGTGTGTTGACAAATGGCTGAAAATTAATGCATCTTGTCCTCTCTGCAAGCTTGAGATTGGTGATTCTAGTGAAGTAGAAGCTGAATCTGTTCATGAAACAGAAGAAC[AGAGAGAGAGAG]ATTCTCGTAATGAGGGAGTGTGAAT	TGTAGAGTGTGTTGACAAATGGC	60.088	ATTCACACTCCCTCATTACGAGA	60.012
Unigene22685	TTCTTCTTCTTCTTC	TTC(3*5)	GGTTTTCTCATCCAGATAGGCTTCTGTTTGTTCACAAGACTCCATTCATGTGAAACTTCCTTGATT[TTCTTCTTCTTCTTC]TCTTCCTTCTCCTTTTCTTCATCCACTTCCTCAACAGTGCCTTCTTCCTCTTTCT	GGTTTTCTCATCCAGATAGGCTT	59.984	AGAAAGAGGAAGAAGGCACTGTT	59.943
Unigene22713	CTCTCTCTCTCTCTCT	CT(2*8)	CTTTGACAGACCTGGACTGAGTTCTTCAGTTTCAGGTCACTGCAAATGTAGTTGTAAAGAGTCAGAAAATAATCTTGTTGATCATTGAGATATAAAATAAGGTTATGAC[CTCTCTCTCTCTCTCT]GCGTGTGAGTGTGCTGACTCACCTCAAACTAAAT	CTTTGACAGACCTGGACTGAGTT	59.831	ATTTAGTTTGAGGTGAGTCAGCA	58.074
Unigene22735	CAGCAGCAGCAGCAGCAG	CAG(3*6)	CTATCTCAGGGAAGTGAGGGAGTCACAGGCTAAGGCAAGGGGAATTGCTTATGAGAAAAAGAAACGAAAGCGTCCCCCAATA[CAGCAGCAGCAGCAGCAG]CAACAGCAACCAAATGTACTCCAG	CTATCTCAGGGAAGTGAGGGAGT	60.137	CTGGAGTACATTTGGTTGCTGTT	60.45
Unigene22801	GCTGCTGCTGCTGCTGCT	GCT(3*6)	AGCATAAGAACCCCCATATGACTGTCCAGGTTGAAGATGCTGTGGATGTTGAGACTGGGGTGCTTGTTGCATTGGCATAGATGCCC[GCTGCTGCTGCTGCTGCT]GGGCATTTGCATCAGTCAGCTGTTTTGGATCACCAACTATC	AGCATAAGAACCCCCATATGACT	60.108	GATAGTTGGTGATCCAAAACAGC	59.891
Unigene22860	CAGCAGCAGCAGCAG	CAG(3*5)	AGGCTCTTCTCAAAAAGTATGGGGCATCTCTTGATATTAGCACCCCTCCAAAGCATTCT[CAGCAGCAGCAGCAG]TAAAGAGACTTACGATTCTTCTACCCCAGCTTCAGGTGGGAGAGAACCTCCTATTGTTCTGGG	AGGCTCTTCTCAAAAAGTATGGG	60.134	CCCAGAACAATAGGAGGTTCTCT	60.009
Unigene22951	TCTTCTTCTTCTTCT	TCT(3*5)	GAATACTTGAAGATGCAACAGGGTTCTGTTGTGAATTTGAAGTAGTATTTAACTCTGAATGCTTTTCTGCTGCAGTGGGTTTAAAGACAATTACTTCA[TCTTCTTCTTCTTCT]TTATCTGAATCTGCCTTCACAGTAGTAACTCCCGAAGCACATAACAC	GAATACTTGAAGATGCAACAGGG	60.014	GTGTTATGTGCTTCGGGAGTTAC	59.947
Unigene22958	TCTCTCTCTCTCTC	TC(2*7)	GGCAGAAAAATCCTATGTTTGAAAGATTACCATAAAACACAACATCACATACATACAGATATT[TCTCTCTCTCTCTC]TTATTCGATGGGAGGATTGATTTTGGCCCGCAGTTATTCTCCTGTTTAGA	GGCAGAAAAATCCTATGTTTGAA	59.512	TCTAAACAGGAGAATAACTGCGG	59.801
Unigene23026	CGTGTCGTGTCGTGTCGTGT	CGTGT(5*4)	ATTTTGCTTTTCTTCTTTGGTCC[CGTGTCGTGTCGTGTCGTGT]CAGGCACCTTACTAAGCAGTTGAAGCCGAAGCCATCATCATGATCAGAAATTCGTCGAAGCTCACGTACCCATCACCGTTGGAATCGACGCTCGCTATCATAATCCGACAATC	ATTTTGCTTTTCTTCTTTGGTCC	60.001	GATTGTCGGATTATGATAGCGAG	59.969
Unigene23078	CTTCTTCTTCTTCTT	CTT(3*5)	CTCTTCTTCCTCTTGATCTTCCCCATATTTGGCTTTCTCCTGGTTGTCCTCCTCTGCATCAACGGGCGG[CTTCTTCTTCTTCTT]CTCTGTACCATTCATAGATTGTTTGCCTACAGTTTCCAC	CTCTTCTTCCTCTTGATCTTCCC	59.846	GTGGAAACTGTAGGCAAACAATC	59.926
Unigene23088	CTTCTTCTTCTTCTT	CTT(3*5)	GAACAATGTAATGGCATCATCAAGATCTTCTG[CTTCTTCTTCTTCTT]CTATAGGTATCAATGGGATTAGGTGAGTCCCAGAATCATCAT	GAACAATGTAATGGCATCATCAA	59.718	ATGATGATTCTGGGACTCACCTA	59.841
Unigene230	GGAGGAGGAGGAGGA	GGA(3*5)	TACCAGGGACTTCCCAGAAAATCAGGGCACGGTGGTAAGTACACGTGGGAGGGACCCCGCGG[GGAGGAGGAGGAGGA]TGAGGATTACCCAGCCGCCATAGATGAGAAGGATCCCAACTTCAT	TACCAGGGACTTCCCAGAAAAT	61.043	ATGAAGTTGGGATCCTTCTCATC	60.679
Unigene2323	CGTCGTCGTCGTCGT	CGT(3*5)	CAGATGATGGAAGTTGTATGGGTTGCTTTTCACACGCTTGTA[CGTCGTCGTCGTCGT]TCTTCCAGCTGAGAAGATTTCACCTCTGGTTTTATATGCTCAACATCACTTCTCAGAATCTGGGAGGACTACCTGCAAGGCAGAGAGTTTCATGTTGAG	CAGATGATGGAAGTTGTATGGGT	60.123	CTCAACATGAAACTCTCTGCCTT	59.936
Unigene23335	CTGCTGCTGCTGCTG	CTG(3*5)	ATTCTTATCATCTGGGTCAGCAGCTGCTCTGAAAGCCTTCCAGGCAAAGTAAAACGCCACAGCGGACA[CTGCTGCTGCTGCTG]CTCCCACCACGAGAAGCCGATCTCTGTTTCTCTTGGACGCCATACCCATTGTCGCAATAGTCAGTACACGATCAG	ATTCTTATCATCTGGGTCAGCAG	59.628	CTGATCGTGTACTGACTATTGCG	59.842
Unigene23498	TGTGTGTGTGTG	TG(2*6)	CCAAGTCATGCATGGTAACTAGATCCATTTTCATGGAGTT[TGTGTGTGTGTG]CATGGAGTCTTGATGGCTTTTTGAGGAACAGGGTTATA	CCAAGTCATGCATGGTAACTAGA	59.167	TATAACCCTGTTCCTCAAAAAGC	58.747
Unigene235	GCCTCGCCTCGCCTCGCCTC	GCCTC(5*4)	AGACGATCGTATTCTGGATCAAATTCCATCATCACCAGGTATACATCAGAAGAGCGTGTGGCTGTGTTTTTAGGTCCCATGGTTTAGCAGCCTT[GCCTCGCCTCGCCTCGCCTC]TGCTCTGCTCTCCCTCTTACAGTACCA	AGACGATCGTATTCTGGATCAAA	59.979	TGGTACTGTAAGAGGGAGAGCAG	59.95
Unigene23677	GAGGAGGAGGAGGAGGAG	GAG(3*6)	CCAGAAGGAGAAGAAGACGAAGTA[GAGGAGGAGGAGGAGGAG]CATCTGGTGGAGGTGTCTCACTCGGTTACTTTTAATCCACCTCC	CCAGAAGGAGAAGAAGACGAAGT	60.406	GGAGGTGGATTAAAAGTAACCGA	60.561
Unigene23708	GAAGAAGAAGAAGAA	GAA(3*5)	TGAAAATGCAACAGATGAGAATGCTGTTTTTTCCTACTGAC[GAAGAAGAAGAAGAA]GCCGAAGACATAGCAATGCCGGGAATCAGAGATAGGGCGTCTCGCGTCTTTAGGAACCCTATGCAGAAAACC	TGAAAATGCAACAGATGAGAATG	60.124	GGTTTTCTGCATAGGGTTCCTAA	60.68
Unigene23719	TATATATATATA	TA(2*6)	CATCAGACAAATTTCCATGTGCATGTATGCATATACATATATATACCGGTATATATGTACATATATATACCGG[TATATATATATA]CAACTACATATTAATATGACCAACAAAAAAGGATGATTAAAGAACTTAATAGGTAAACAACTGCAGAAGAATACA	CATCAGACAAATTTCCATGTGC	60.374	TGTATTCTTCTGCAGTTGTTTACCT	58.523
Unigene23735	GCAGGAGCAGGAGCAGGAGCAGGA	GCAGGA(6*4)	CTTCTCAAAAACAACTTTGGTGGCTAGTCCTGAGAATCGCCAGTG[GCAGGAGCAGGAGCAGGAGCAGGA]GCTGGAGCTGTGGTTGGAGAAATGAATGGCAGTGAACCAGGCTGGGATAAAAACATATCTGCA	CTTCTCAAAAACAACTTTGGTGG	60.055	TGCAGATATGTTTTTATCCCAGC	60.338
Unigene23809	GATGATGATGATGAT	GAT(3*5)	TTGAGCAAAATCAAGTTCAACAATAATAAGCCTGTCATGATCAATCAAGCAGCCTGTGACTCTGGAAAC[GATGATGATGATGAT]GGCATGTACGCCATTAATGATGATGGAGTAAATCTATGGAGTGGTCTACCAGAGGACATAGTGGACAGG	TTGAGCAAAATCAAGTTCAACAA	59.787	CCTGTCCACTATGTCCTCTGGTA	60.421
Unigene23874	AATAATAATAATAAT	AAT(3*5)	GGTTTGTTTGAGTCATTTATATTTTTTTATGTATTTTTTTTATAATTTTTCCTAGTATTTTTATAATAATAATTTAATTTTAAGGTAATATCAAGTTATTATTAAAGTTAAATTA[AATAATAATAATAAT]ATAATTAGGTCATAGCCAAGTCTTACATCA	GGTTTGTTTGAGTCATTTATATTTTT	56.31	TGATGTAAGACTTGGCTATGACC	58.277
Unigene23977	ATGATGATGATGATG	ATG(3*5)	ACTCATCGAAGTTTGAACCAAAAATGAGTTTTGAAGCTGTTGCGAAAGAGCCAGCTACTGCATTTCTCTCCAGTCTCC[ATGATGATGATGATG]AAAGATACCATGACTGCGAGCCATTCTTGATAGTAT	ACTCATCGAAGTTTGAACCAAAA	60.028	ATACTATCAAGAATGGCTCGCAG	59.791
Unigene24016	TCTTCTTCTTCTTCT	TCT(3*5)	CAGTTTGATTCTTTGGCAAATTCTGTCTTAAGCGCACAGAGTTTGGTATTTGCTTTACATGAGACAAGGGAGTGTCATCA[TCTTCTTCTTCTTCT]AGTTCATCACCATCAGATTCACTGTGTACCTCTTCGTCGTCTGTTGTGTCATGTCCTTCAAAA	CAGTTTGATTCTTTGGCAAATTC	59.997	TTTTGAAGGACATGACACAACAG	60.06
Unigene24649	ATTATTATTATTATT	ATT(3*5)	GCTGTCTTCTACATCAACCTGCTTAGCAGA[ATTATTATTATTATT]GTTATTATTAATATTATAGAGCATTTTCTGTCTGTTGAGGCTTTCTCTGATGGCATCCCTGAGATCCACAGTACTGGACGTTTTGGCAGCAATTTCCCTTCCATCTAAAG	GCTGTCTTCTACATCAACCTGCT	59.963	CTTTAGATGGAAGGGAAATTGCT	59.982
Unigene24793	CCACCACCACCACCA	CCA(3*5)	ACCTCCTCCTTTGGGTATGGGGCCTCCTCCTGGCTGGGCAAGGGGACCACCACCACCCCAAGGAGGTGTAAGG[CCACCACCACCACCA]CAAATGTCAATGCAGCCTCAAGGTAT	ACCTCCTCCTTTGGGTATGG	60.183	ATACCTTGAGGCTGCATTGACAT	62.083
Unigene2486	ATATATATATAT	AT(2*6)	CGATAGTTTAGTTTGGCTGAGGATATATGTGCCCTCTTTCAGGCCTCTTCATTGTTTTAAAGTGTG[ATATATATATAT]GCGTATCTTTGTATGAATAAAAGTATATTGAAATTGTGTCTAGTGCATTAAAGGGCCTCTTTCCTGTTTGGAGTAGT	CGATAGTTTAGTTTGGCTGAGGA	59.801	ACTACTCCAAACAGGAAAGAGGC	60.175
Unigene24903	GATGATGATGATGAT	GAT(3*5)	GTTGGACGGTTACTTGGGTAGATGTGGGAGGAGGGCATTACA[GATGATGATGATGAT]TAACATCCATTAAGAGTGAATATGGTCTATTAGACCTTTATAAGGCATAAAGAGATTACTCAAAATTCTTTGGAATTTTATTTACATGCTTGA	GTTGGACGGTTACTTGGGTAGAT	60.509	TCAAGCATGTAAATAAAATTCCAAA	59.041
Unigene24945	GAAGAAGAAGAAGAAGAAGAA	GAA(3*7)	AAATTGACAAAGAAAACAGCCAACCTGGATTTATCTTGT[GAAGAAGAAGAAGAAGAAGAA]TTTCCAGCAAAAGAGGATGAAGTCATCACC	AAATTGACAAAGAAAACAGCCAA	60.03	GGTGATGACTTCATCCTCTTTTG	59.99
Unigene25159	GAGGAGGAGGAGGAG	GAG(3*5)	AAGCACTTATGGCAGAGTTCATCATATTATTCTCAGAGCTTTCCATACTATTCTGAGAGAGGCCATAATTGTATTAATAGGCCAAA[GAGGAGGAGGAGGAG]GACTGAGACTGTGAGACTAGGTAACAGAAGGCCA	AAGCACTTATGGCAGAGTTCATC	59.803	TGGCCTTCTGTTACCTAGTCTCA	60.301
Unigene25724	CAACAACAACAACAA	CAA(3*5)	TGCGGCATGACATACTAAATAT[CAACAACAACAACAA]CTCTATCATAACGAGTCTCAAACATTGTTTAGCAACAAAAACAAACAACATACATTAGTAATCACTTTACAATAGCTCACATACATAAGAAACAAATATCTATCGGAGAAATGGAAAACTG	TGCGGCATGACATACTAAATATC	59.04	CAGTTTTCCATTTCTCCGATAGA	59.617
Unigene2624	ACAACAACAACAACA	ACA(3*5)	AACTACGCACGCAACTACAACTCGTCGTCGGCGTATGGTAGCGAATACT[ACAACAACAACAACA]ACTCGTTCTACGCGCAAGAGACCGGTACGACTTTTTACC	AACTACGCACGCAACTACAACTC	60.761	GGTAAAAAGTCGTACCGGTCTCT	59.947
Unigene2785	GAAGAAGAAGAAGAA	GAA(3*5)	AGCAAGAAGTGTAACAATGGAGCCTCAGCAGTCTTCTGAATGG[GAAGAAGAAGAAGAA]GAGATTGAGAACCGCATTCCTTCTGCAGACATCAAGGTATTTGTGGGGAATCT	AGCAAGAAGTGTAACAATGGAGC	59.839	AGATTCCCCACAAATACCTTGAT	59.965
Unigene27978	CCTTTCCCTTTCCCTTTCCCTTTC	CCTTTC(6*4)	GTGTCAGTGTAGCTTTGGGTAGGATTCATGAAGATTATTCCCTTTTCCTCTCCCTTTT[CCTTTCCCTTTCCCTTTCCCTTTC]CACTGGCACTCCCATTACCATGGAGTGCAAACAATGGGTATGGAACCACTTTGCAGCTGATAAAG	GTGTCAGTGTAGCTTTGGGTAGG	60.102	CTTTATCAGCTGCAAAGTGGTTC	60.302
Unigene28768	TAATAATAATAATAA	TAA(3*5)	CAAAGGATTCATGGAACTGGTTAGGAACTTGGGCACTGAAAACCACACAACTAGTT[TAATAATAATAATAA]ATGTCTAGGCCACCTTTCCCAGTCTCTGGATGTGTAC	CAAAGGATTCATGGAACTGGTTA	60.223	GTACACATCCAGAGACTGGGAAA	60.409
Unigene28882	GAAGAAGAAGAAGAA	GAA(3*5)	CAGAGTGGCTGCCTGTATAAAACGAACCAGAGTAGCTGCCTGTATAAGATGAACCAGGCCGAGATACTCCTTGAGATGGCCATGAACCTGCT[GAAGAAGAAGAAGAA]TAAAGAGGAACAGGATCAGGATCAG	CAGAGTGGCTGCCTGTATAAAAC	60.195	CTGATCCTGATCCTGTTCCTCTT	60.979
Unigene28945	AGAAGAAGAAGAAGA	AGA(3*5)	ACACTTGACATAACCCACGATTCTGGAACACTGGAATCATATGGTTTTGTTAAAG[AGAAGAAGAAGAAGA]ATACTAGAGATGAACCGAATATGTCTCTAGCAATTGC	ACACTTGACATAACCCACGATTC	60.165	GCAATTGCTAGAGACATATTCGG	60.128
Unigene28963	ATTTTATTTTATTTTATTTT	ATTTT(5*4)	GTTGACACCTTTCTGAGATTTGGAGGAGG[ATTTTATTTTATTTTATTTT]TTTTGTTTCCTTTTATTTCTTCTTTTGGTTTCTTCCGATTT	GTTGACACCTTTCTGAGATTTGG	60.026	AAATCGGAAGAAACCAAAAGAAG	59.995
Unigene29038	CTGCTGCTGCTGCTG	CTG(3*5)	GAGACAAGAGGGTAAAGACATGGTTCGCCTGTGTCTGTGACT[CTGCTGCTGCTGCTG]CTTGTCCTCCCATTTATGCTCGGAATCCAGAAAAGAAGCGTCCGCGGAGGTTTGGCCGTAAAGGTTTTCATAATAACGCCGGTTCTTA	GAGACAAGAGGGTAAAGACATGG	59.157	TAAGAACCGGCGTTATTATGAAA	59.884
Unigene29484	GATGATGATGATGAT	GAT(3*5)	CCTATGACTCAAACCAGTATGGCTCGGGGTTGAGCATCCCCATTATAAGATTTTTTAGTTATTTGGTTGTTTCAATAATCATATA[GATGATGATGATGAT]GGGTCCGGGAATGAATATTTTTGAAGAG	CCTATGACTCAAACCAGTATGGC	59.906	CTCTTCAAAAATATTCATTCCCG	59.037
Unigene30499	AGAAGAAGAAGAAGA	AGA(3*5)	AGATTCTCTGCAAAACATGAAGCAGCTACCACAC[AGAAGAAGAAGAAGA]CCAGCACCACCGAGCTGTGTCATGAGATTAAATTGAGTCATTTTACACAGCTGAGCTGATTCATATTAACCCCAATCTTTCCTCATAGAG	AGATTCTCTGCAAAACATGAAGC	59.912	CTCTATGAGGAAAGATTGGGGTT	59.854
Unigene3104	TCTCTCTCTCTC	TC(2*6)	AAACTGCGGGGGATATAGATAAGCAGAAGCACAGACTTCAA[TCTCTCTCTCTC]TTCTTCTTGTGAGAAAAACCTAGCCAG	AAACTGCGGGGGATATAGATAAG	59.755	CTGGCTAGGTTTTTCTCACAAGA	59.935
Unigene3192	TGTGTGTGTGTGTG	TG(2*7)	TCATGAATGTTATTCTGAATTTGTTATGTCTTT[TGTGTGTGTGTGTG]TCATTTCCCTGTTGTATCTGCTGGCATTTTCTGAAAATTTGCTACAGCTGTTTCCAAATCTCCATGCTTCTGTAT	TCATGAATGTTATTCTGAATTTGTT	56.897	ATACAGAAGCATGGAGATTTGGA	59.979
Unigene33780	TTCTTCTTCTTCTTC	TTC(3*5)	TTACTGTTACAGATGGCGTCCTTATGGCCGCTCCATGCAGATT[TTCTTCTTCTTCTTC]GTTTTGTTTCGTTTTTTGAGTTTCTTTTGGGGATT	TTACTGTTACAGATGGCGTCCTT	60.069	AATCCCCAAAAGAAACTCAAAAA	60.195
Unigene33931	GAATTGAATTGAATTGAATT	GAATT(5*4)	TGATTTGAAGGTTGAATTGCTTTCAGAGGTAGACCCTGGGGTGGGTGATTTGAA[GAATTGAATTGAATTGAATT]AAGAGGGCAGCCAATTGAGCTGAATTGAGAATTCGGAGTGTATCAATGG	TGATTTGAAGGTTGAATTGCTTT	59.997	CCATTGATACACTCCGAATTCTC	59.849
Unigene34135	TTCTTCTTCTTCTTC	TTC(3*5)	TTTATCCTTGACATCATCCTGCTCTTTA[TTCTTCTTCTTCTTC]GTTGTGACATTGATTATTTCTTCCTCAGCATTCCCTAGTGAGCTTCTGACCTCCTCTTCCTTGACCCGGACGGATATGGAGACGACTTTAGGCCT	TTTATCCTTGACATCATCCTGCT	59.979	AGGCCTAAAGTCGTCTCCATATC	60.004
Unigene34135	TCCTCCTCCTCCTCC	TCC(3*5)	ACGGATATGGAGACGACTTTAGGCCTGGCGTCCTTGCCAATGGGGGACTCA[TCCTCCTCCTCCTCC]TCGATATTAACATCAGTGGGCGTGAATTCCTTCTTCACTTTGGCTGCCTTGGATGAGTTCGCCTCCTTGTTCTTCATTATTA	ACGGATATGGAGACGACTTTAGG	60.717	TAATAATGAAGAACAAGGAGGCG	59.652
Unigene3456	AGGAGGAGGAGGAGG	AGG(3*5)	TATTCTCTTGTGGGTAATGCTGCGGCTGCTGATGCTGTTGAGTCCTCATGTCTTCATGTAC[AGGAGGAGGAGGAGG]GCCGGGCCTTGTTGCTGCTGCTGTTGTTTCGTGAACATGATGGGGGGGCCTCATGCCTTGAACCTGAGACCTGAGATCTTC	TATTCTCTTGTGGGTAATGCTGC	60.503	GAAGATCTCAGGTCTCAGGTTCA	59.87
Unigene3780	GCTGCTGCTGCTGCTGCTGCT	GCT(3*7)	CAGAAGGTGCTAGTCTCTGAGGAGGGGGCG[GCTGCTGCTGCTGCTGCTGCT]GCCTGGAGAGAGTAGTAAGAAACCTGGGATCAAAACC	CAGAAGGTGCTAGTCTCTGAGGA	60.195	GGTTTTGATCCCAGGTTTCTTAC	60.102
Unigene3828	CTCTCTCTCTCT	CT(2*6)	TCTCAATGCCAAAAGAAAAACATATAGTAACCAATCAACATACCAACCCCTAGAAGATACCTTTC[CTCTCTCTCTCT]AATTGGGTCGAGAGACGCTCTACATCCTAGT	TCTCAATGCCAAAAGAAAAACAT	59.997	ACTAGGATGTAGAGCGTCTCTCG	59.225
Unigene3930	TATATATATATATA	TA(2*7)	TACCAAGGCGGTTACTAAGTTCACCAGTTCCTGAATTTGC[TATATATATATATA]TTTTGGGTATTTAGGTTCGATGACGTTGTTTTACGCCATTTCTGCCATGAAACTTTGTCTTACC	TACCAAGGCGGTTACTAAGTTCA	60.063	GGTAAGACAAAGTTTCATGGCAG	60.048
Unigene39703	ATTATTATTATTATT	ATT(3*5)	GACACCAATTATGTGTCTGGCTTGGCAGTGACCTTAAAATTAGATA[ATTATTATTATTATT]AAGCACCTAGAAGGATAAAAAGAAACAGAGACAGTATTATCTTGGTACTTAAAAGATTCAGGGCTAAGATTGATCTATGC	GACACCAATTATGTGTCTGGCTT	60.296	GCATAGATCAATCTTAGCCCTGA	59.735
Unigene39	TACTACTACTACTAC	TAC(3*5)	TTGTGAAATATGTGGCTCAACTGCTCGTAATGTTGTGGGCATAGAGGATGGAGAGGTTGTGGACGACTCCAATGAGGGAAA[TACTACTACTACTAC]ACCAATCCAGGAAGAGAGGAACTCAT	TTGTGAAATATGTGGCTCAACTG	60.046	ATGAGTTCCTCTCTTCCTGGATT	59.613
Unigene40016	GCAGCAGCAGCAGCA	GCA(3*5)	TAGTAAACGACATTGAGTGGGGTCTGAACAACTTTTATGGGCATCGAGGAGTTGTGATACCCACTACTCTTGTATATGGGCTGATCAGTGGCT[GCAGCAGCAGCAGCA]CGAGCTGCCATGCTCTCTAATTGTTTCCAG	TAGTAAACGACATTGAGTGGGGT	59.812	CTGGAAACAATTAGAGAGCATGG	60.136
Unigene40665	GCAGCAGCAGCAGCA	GCA(3*5)	AACTGAAATGGCAGGTTATACCACAGCCGCCTC[GCAGCAGCAGCAGCA]ACAATGGTACAATCCTTTAGGAAGAAGATGGAGTTGTTTTCCACCATGACTATGACTGGTATTAACTCCAAGCGAGGCAATGTCAATGGCATCGGTATTGACATGTCTACA	AACTGAAATGGCAGGTTATACCA	59.786	TGTAGACATGTCAATACCGATGC	59.903
Unigene40676	CAGCAGCAGCAGCAGCAGCAG	CAG(3*7)	ACATGCAGAGTACCCTTAACGAAACATGACATATTACTTTGCATTATT[CAGCAGCAGCAGCAGCAGCAG]AAAAAGATAAGACAAAGTGATGCCGATGGTAATTAGCCATCTTCTGTCCATGGACTATCTGCATGTTCTCCGTTGT	ACATGCAGAGTACCCTTAACGAA	60.069	ACAACGGAGAACATGCAGATAGT	60.075
Unigene41778	AGAGAGAGAGAGAG	AG(2*7)	ACTGGGCCAACAATTAGTCATTACAAAGGTTATGACAATGAAAAACTTCACAGTTGAACAATATTTCTGCACAGAAGACTGCTTTTATGCGCACACAAAAAA[AGAGAGAGAGAGAG]AAATGAGATCAATGTGCAGTCTTCA	ACTGGGCCAACAATTAGTCATTA	59.786	TGAAGACTGCACATTGATCTCAT	59.755
Unigene42417	TTCTTCTTCTTCTTC	TTC(3*5)	TAACTTCCCATTTTGCTTCTTGACACGGCTGAAAAGTCACA[TTCTTCTTCTTCTTC]AACAGGTCTTCCATATGCATTCTGTGAAACCAGTCTACTAATCTGGAAATGCCCTATACTTCTAAACCCTAGTTCTCCGTATCCAGACCT	TAACTTCCCATTTTGCTTCTTGA	60.115	AGGTCTGGATACGGAGAACTAGG	60.029
Unigene4293	TTCTTCTTCTTCTTC	TTC(3*5)	GAAGGATATGGCCACTTGTAATGTACATTCCACCACTCAAGCAGCTTCTGCCTTGCCTCCTTCGGGAGTTTTCCT[TTCTTCTTCTTCTTC]AGAAATTCTTGCTTGAGACTGCTGAAG	GAAGGATATGGCCACTTGTAATG	59.75	CTTCAGCAGTCTCAAGCAAGAAT	60.199
Unigene4293	TGATGATGATGATGA	TGA(3*5)	CTTGACAGAAGACAAGGACGAATCGGAAATGACGGCCGCTTGTTCATTCATCACCAGCTGTTCTTGTGGTGGGAAATGACCACCGACGAGATGTTTCTGG[TGATGATGATGATGA]CCGCCTTGATTAAACATAGTGGCTG	CTTGACAGAAGACAAGGACGAAT	59.803	CAGCCACTATGTTTAATCAAGGC	60.036
Unigene4293	ATCAAATCAAATCAAATCAA	ATCAA(5*4)	CCTTGAGAATTTCAACAACCAACTCAT[ATCAAATCAAATCAAATCAA]TTCAGCTCTCGCTTTCTGCAGCCGCAACCGCCCAAGCTATCCCATCCAACTCAGACACAAGCAAACTCATCCAGCCACAGGGAAAATTATAAT	CCTTGAGAATTTCAACAACCAAC	59.9	ATTATAATTTTCCCTGTGGCTGG	60.42
Unigene45406	ATATATATATAT	AT(2*6)	AGTGTCTTTGTCGTTTGGTGAGTCGTTCTGTATGATTTTTTTAAAATATCAAGGAATAATAATGCATTTTAAATATTAAAAAAATATATAAAATTTACTTTACATACAAAAGTATAAATTGAGA[ATATATATATAT]GTGAGAGAGATTCTAAAATATAAAATATTAAATGAAAGGTGTTTAATTTCAGGATTCTAAAATATTAAATGAAATGTGTTTAATTTCGGGAA	AGTGTCTTTGTCGTTTGGTGAGT	60.124	TTCCCGAAATTAAACACATTTCA	60.548
Unigene4552	ATGATGATGATGATG	ATG(3*5)	CTATGGTCTTGTCCAGAAGCTGCGTGGGGATA[ATGATGATGATGATG]TTGGTAGTCTTGTGTAATGGACCTCACTAAGTTGTTGTACGCACTGTTTGAG	CTATGGTCTTGTCCAGAAGCTG	59.004	CTCAAACAGTGCGTACAACAACT	59.406
Unigene45874	GATGATGATGATGAT	GAT(3*5)	AGAGGAGAGGCTCCATATCTTTGAAGCTG[GATGATGATGATGAT]GGTGATGGTAGTTAGAATCCTTTAATCCTTCTATGAGTTGGGTCATTTTCCCT	AGAGGAGAGGCTCCATATCTTTG	60.229	AGGGAAAATGACCCAACTCATAG	60.576
Unigene46138	GAGAGAGAGAGA	GA(2*6)	AAGTGAGGAAAGCTTTGGAG[GAGAGAGAGAGA]AGCGAGAGGGAAAGGGAAGCCGCCCGTGGTGACGCAGATGCTGAGCGCAAGAAGCTCTCCACCCTGCTCGCTGATTTGGAGGACGATGCCCTCGGCTACAGTAGATTACGCCCCTCTAAACC	AAGTGAGGAAAGCTTTGGAGG	59.872	GGTTTAGAGGGGCGTAATCTACT	59.133
Unigene4652	AGAAGAAGAAGAAGA	AGA(3*5)	CTGTCGACATGAATTCCAAGATTCCGAATTGGATGCTGCGGGAACCAGCAGGATGTGTTTCAAAGCCATC[AGAAGAAGAAGAAGA]AATGGGCACTGGTAAACGCGCCCGCAGAACATTGGACAGTGAAGAGG	CTGTCGACATGAATTCCAAGATT	60.366	CCTCTTCACTGTCCAATGTTCTG	61.078
Unigene46651	CTGCTGCTGCTGCTG	CTG(3*5)	CATTGTCGTCACTGGTTAAATGACCTGGCCAAGCTTCTGTGGCATCGAACTCTTCATCACTGTCTGAGCTATTCTCACTCTGGTATCCAGACTCTGGGGACTCTT[CTGCTGCTGCTGCTG]CTACTACTTCTTCTTCCTCTTCTTCTGATTTGC	CATTGTCGTCACTGGTTAAATGA	59.912	GCAAATCAGAAGAAGAGGAAGAA	59.146
Unigene46688	TATATATATATA	TA(2*6)	ATGGTGCTCATTGATACGAAAATCTCTCTTCTTGTACTTGCACATATATAT[TATATATATATA]AACATATTTTCCCAAGAACTCAGTGTGTATTTGGACCTGTACATCCTCG	ATGGTGCTCATTGATACGAAAAT	59.756	CGAGGATGTACAGGTCCAAATAC	59.776
Unigene46816	TGCTGCTGCTGCTGCTGC	TGC(3*6)	TATTATTTGCTTGCTGCTGTTGATGTTGGGCAAATTGCTGCTGTTGTAGTTGTTTTACT[TGCTGCTGCTGCTGCTGC]TGATGCTGCAAAGCCATTGAGTTGTAGAAATCCA	TATTATTTGCTTGCTGCTGTTGA	59.93	TGGATTTCTACAACTCAATGGCT	60.014
Unigene47015	CTCTCTCTCTCTCT	CT(2*7)	AAATCTTTATGCCCAGGAGAATCCAGAAGTACAACCTTAAAGTTCCTTAATTCAAAATGTGCCACAGCCACTGTCATAGTTAAAC[CTCTCTCTCTCTCT]TCTGCACTCTCATCTAAAACCCATGCATATGCAAATGATCCTTTTCCTTTCTGTTTAGCCT	AAATCTTTATGCCCAGGAGAATC	59.833	AGGCTAAACAGAAAGGAAAAGGA	59.793
Unigene47190	TTAAAATTAAAATTAAAATTAAAA	TTAAAA(6*4)	AAAGCATGGGAAAATTAGAAAGCATCAATTTCATGAGGAATAATGTCAAATAATTCAAGAAATTTC[TTAAAATTAAAATTAAAATTAAAA]TAATCTCAACTGTGATAAATATGGAAATCGAAAATACCTGAAATTCACCAA	AAAGCATGGGAAAATTAGAAAGC	59.991	TTGGTGAATTTCAGGTATTTTCG	60.219
Unigene50105	GAGGAGGAGGAGGAG	GAG(3*5)	GATAGTAAAGGTCTCCCGCAGTTGCGTAGCGATGGCATCTGCTTTAGGCGTCTCTAACA[GAGGAGGAGGAGGAG]AAGGGAGAGTAATCTGAGATCGTACGTAAGAAAGCC	GATAGTAAAGGTCTCCCGCAGTT	60.037	GGCTTTCTTACGTACGATCTCAG	59.467
Unigene5064	CAGCAGCAGCAGCAG	CAG(3*5)	TATGATAATTTTCAGGCTGGTGCTGGACTCC[CAGCAGCAGCAGCAG]CGGCTGCTGCTATGCGGCAACAAATGATGTATTATCA	TATGATAATTTTCAGGCTGGTGC	60.338	TGATAATACATCATTTGTTGCCG	59.746
Unigene51842	AGAGAGAGAGAG	AG(2*6)	AGTTTGATGGCACATGATGACTGAAGC[AGAGAGAGAGAG]AAGGGCAGTAATAATCTACGTAAAACTCTCTGAGAAAACTATCGTCTTCTGGCAGCAGCAGCTCGTCCTAATGGGAACCTACTAGTGTGGGGCTTAGG	AGTTTGATGGCACATGATGACTG	62.252	CCTAAGCCCCACACTAGTAGGTT	59.961
Unigene52389	AGAGAGAGAGAG	AG(2*6)	AATTCTCTGGTGCAGCCATATTT[AGAGAGAGAGAG]ATGGTTCTGCAGCAATTGGGCGATTCTCCCGTTCAACAACAGCAGCAACAAGTCGGGGATGTTCCAGCAAAGAAGCTTGTCAGGCAGCTCGATTTTACATCATA	AATTCTCTGGTGCAGCCATATT	59.993	TATGATGTAAAATCGAGCTGCCT	60.128
Unigene52538	CTTCTTCTTCTTCTTCTTCTT	CTT(3*7)	AGCACTACAACGGCTCTAAATTGAAGTCCTCGCCTTTGGCTTCACCTC[CTTCTTCTTCTTCTTCTTCTT]GTGACGAGAACTCCCCAGAAGGGCACGATTTGGATACATGGATAATCTCTAGTCCAGGTGACAATCCTCAGCTTGTCAAAACAAG	AGCACTACAACGGCTCTAAATTG	59.861	CTTGTTTTGACAAGCTGAGGATT	59.812
Unigene52812	AACAAGAACAAGAACAAGAACAAG	AACAAG(6*4)	ATTAAGGAAGGAACCCATTACCACTGGGTGGATCTCCCAAGAGCCATTGTTGGCC[AACAAGAACAAGAACAAGAACAAG]AACCAGATTCACACTTTGCTAAAAAGCAGATGC	ATTAAGGAAGGAACCCATTACCA	59.962	GCATCTGCTTTTTAGCAAAGTGT	59.971
Unigene53586	TATATATATATA	TA(2*6)	GAAGTAAATGCCCACTACACCAGTGGAGGCCGAAGTGAATGGTGTACG[TATATATATATA]TTTAGTATAGATATATTTTATATATGTGATAATTAGCGAAGTTTGTTTTTTGGTTTGTGGATGTTTGTGACAAGTG	GAAGTAAATGCCCACTACACCAG	59.941	CACTTGTCACAAACATCCACAAA	60.862
Unigene549	TGATGATGATGATGATGATGA	TGA(3*7)	AAGGGTCTAGAAGAGAGGCTGAAGACAAGATTGCTCCTCGAAATATTGATGCTGATGATTCTGATGTTGATATAAAAAATGATTCAGATGAAAG[TGATGATGATGATGATGATGA]TGGCGAGGATGAAACAGCAGCTTTATTGGCAGAACTAGA	AAGGGTCTAGAAGAGAGGCTGAA	60.029	TCTAGTTCTGCCAATAAAGCTGC	60.056
Unigene5586	GCGCGCGCGCGCGC	GC(2*7)	GCATCTGTAACAAGCAGTGAGT[GCGCGCGCGCGCGC]AGATATCGCAATCGTCGTCGTCATCCCCGCCCGCCCTGCTCTGTTATTTGACAAGGCCAGCTCTCTATTAACAA	GCATCTGTAACAAGCAGTGAGTG	59.994	TTGTTAATAGAGAGCTGGCCTTG	59.926
Unigene5633	ACACACACACACAC	AC(2*7)	GGTGGTGCTTTTTACTTGTCAACATTTGCTGTGAGCGTTAAGATATTAAGGTAGGCCATAACATCCA[ACACACACACACAC]CTGTGTCATTGTTGACAATACCTTCAAGGTGTGTTTATTCAGTAGGATGCCC	GGTGGTGCTTTTTACTTGTCAAC	59.961	GGGCATCCTACTGAATAAACACA	60.25
Unigene5676	AGGAGGAGGAGGAGG	AGG(3*5)	CAAATTGAGGTTGCATGTACTGATTC[AGGAGGAGGAGGAGG]ACAAGACAACTCGATGCAGCTTTCTAGTAGCTAGCTAGCTGATTCTTTGCTAATCTATGGATATCTACACCGCTTCTCTCTAATTCTATAGTTCGACTCTTAATGCGCTTT	CAAATTGAGGTTGCATGTACTGA	60.046	AAAGCGCATTAAGAGTCGAACTA	59.61
Unigene5723	TATATATATATATATATA	TA(2*9)	AGAACCTGGGATTTTTCTTTCTGACAGTTGTGCTATATTGACTATTATAGCTCT[TATATATATATATATATA]GCTGTTATCTGTTGACTGAGAAGACTTGTATAATTAGATTTTAGAGGACTGAAAGGCTTTGCTAT	AGAACCTGGGATTTTTCTTTCTG	59.992	ATAGCAAAGCCTTTCAGTCCTCT	59.934
Unigene5776	TCTCTCTCTCTC	TC(2*6)	CACAGACAACCCTGGATATTCTCCACGTCAGAGTGGGAGCAATTATAATCTGGCTGCCGGTAGCTCATATCCTCTATCTGCTGCAGCTGTAAAAT[TCTCTCTCTCTC]AGCATAAGCCAGACACTGTCAGTGGGAACACTCTTCAT	CACAGACAACCCTGGATATTCTC	59.878	ATGAAGAGTGTTCCCACTGACA	59.622
Unigene580	GATGATGATGATGATGATGATGATGATGATGATGATGATGATGATGATGATGAT	GAT(3*18)	GCAAAAAGGTTTCAAAGAAACAGGATTTATCAGACACAGAGAATAGC[GATGATGATGATGATGATGATGATGATGATGATGATGATGATGATGATGATGAT]GAGGTTTATAAAGAAGGGGTAAATGGTTCATCAAAGAGTAAAACTAAGGGCCGT	GCAAAAAGGTTTCAAAGAAACAG	59.358	ACGGCCCTTAGTTTTACTCTTTG	60.064
Unigene585	ATCATCATCATCATC	ATC(3*5)	CGTCACTGAAATCATCATCAGA[ATCATCATCATCATC]ACCTGCATGTACCTGGAAAGCTTTGGCCTGAGTTGCTAGCTTGTGAAGCCTCTGACTATCAACTTCATCCCCATCTTCAGTATCAAC	CGTCACTGAAATCATCATCAGAA	60.125	GTTGATACTGAAGATGGGGATGA	60.201
Unigene5882	GTGGTGGTGGTGGTG	GTG(3*5)	CCTGAATTGGTTTCTGAGTCTCTTGATGTCATATTATCAT[GTGGTGGTGGTGGTG]CTGCAGCACGATGACTCCTGAAAGCAAAACCTGCACTGGAAGCCCCTCCCACACCCAAGAAGTCCCTTGTCAATCCATCACCTGCAATTCCTCCATCTTCATTA	CCTGAATTGGTTTCTGAGTCTCT	58.909	TAATGAAGATGGAGGAATTGCAG	60.445
Unigene5958	TTTTGTTTTGTTTTGTTTTG	TTTTG(5*4)	TTAGAACAGACCGTATCTCAGGCTTTGTGAAATATATACCATAAATAAAAAAGCAGTGAATGCAATA[TTTTGTTTTGTTTTGTTTTG]TTATGCGAGGATTACTTTCAGATATATTGGAAGTTGCAGTGGCATCTTGCAATTTCAG	TTAGAACAGACCGTATCTCAGGC	59.797	CTGAAATTGCAAGATGCCACT	60.264
Unigene595	TATATATATATA	TA(2*6)	AAGTCATTCCAAATTGATGATCGATCCTTTTTATTTATTTAGAGCAGGAAAACAATATATGAATTCTGTGGATATATATATAACGAATGATTTATATATATATCCACACAAACTC[TATATATATATA]TTTTTTCTGTCGATATTGGTGGTT	AAGTCATTCCAAATTGATGATCG	60.197	AACCACCAATATCGACAGAAAAA	59.765
Unigene6019	ATATATATATATAT	AT(2*7)	GATCGATCACAGTGCATAACAGATTACATTTTATTTCTTGCCGAG[ATATATATATATAT]AGACTGCTTTTTTCCGTATTTAGTTCTGTTTCTTCTGCAGTGC	GATCGATCACAGTGCATAACAGA	60.154	GCACTGCAGAAGAAACAGAACTAA	60.115
Unigene6410	AGAGAGAGAGAG	AG(2*6)	GTTTTTAGGGTTGGACTGGTCTCCCTTCCTGCTTTGGCAACATTGATATGTGTCTATGTC[AGAGAGAGAGAG]ACTGATCGCCTTTCCTTCAGCAGCATGCCTTGGATGGATGGTTTAACTAATTGAGCTATATATATGTTTATAACTCCCAAAGGCATG	GTTTTTAGGGTTGGACTGGTCTC	60.261	CATGCCTTTGGGAGTTATAAACA	60.238
Unigene6469	ACACACACACAC	AC(2*6)	GGAAGAGGACACACCTAGTGAGAATGTTGAAG[ACACACACACAC]CTAATGACAATGTTAATAGAGACACACAATGATGATGTTAATGTGCATGC	GGAAGAGGACACACCTAGTGAGA	59.793	GCATGCACATTAACATCATCATT	59.745
Unigene6484	GAGAGAGAGAGAGAGA	GA(2*8)	GGAGCCAGGAAGCTATGAATAATAGGCAGTTGATACTCTTATGAGGACAAGCTTGAAAGCTTGTGGATATGACTTCCCAATTAGAAAGGAAGTCAAGAATCTCCTCTAGATTT[GAGAGAGAGAGAGAGA]AGTCTCTTTGAATAGGAGCAAGGA	GGAGCCAGGAAGCTATGAATAAT	59.974	TCCTTGCTCCTATTCAAAGAGAC	59.036
Unigene6493	TATATATATATA	TA(2*6)	ATCTGCAGTCCAGTTCTGTTCTCTT[TATATATATATA]GAGTTCCGTGTGATCAAAGGTAAACCTTTGACCATGGACCACCAAAACAACGAGGTTCCATCATAAATCCTTTGCAGAAG	ATCTGCAGTCCAGTTCTGTTCTC	59.937	CTTCTGCAAAGGATTTATGATGG	59.977
Unigene668	AGAGAGAGAGAG	AG(2*6)	GGAGGTGTTGATGAGACCATAGATTCAAAGAATCTGCAATATTTCTTGCTTTTGTTGAGTTC[AGAGAGAGAGAG]GGCCTTGAGAGAGACTGGTTTCAGCAATTTCCTTTTCTT	GGAGGTGTTGATGAGACCATAGA	60.376	AAGAAAAGGAAATTGCTGAAACC	60.001
Unigene679	CAGCAGCAGCAGCAGCAGCAG	CAG(3*7)	CGGTTATTTTCAAGCCACAACTGCCAAGCCAGCCACATCTACAACAA[CAGCAGCAGCAGCAGCAGCAG]CAACAGCCACAAGGAATGGTTTCGGCGATGGGACAAGCATTTGCCCAACTCCAACTCTCCAATGAAACCAGACCACAGCTTATGTC	CGGTTATTTTCAAGCCACAACT	60.395	GACATAAGCTGTGGTCTGGTTTC	60.054
Unigene6809	ATATATATATAT	AT(2*6)	GACTCGGATTCTGACAAACTTTCTTACGGTTATTCGTTGATCTATCTTAGACTATAAATTATGGAACAACATAAAGAAATGATAAGGTAAAGATGATAGCC[ATATATATATAT]GGCTTCAAAATAGAGGTGTGACACA	GACTCGGATTCTGACAAACTTTC	59.272	TGTGTCACACCTCTATTTTGAAGC	60.572
Unigene6922	TATATATATATATATATA	TA(2*9)	GCTTAGAAACAAGCCAAACAAAAATGGTAGCTACGTCTAATGCGTAATTACTGGCGTGGCTTCTCCACAGCTTAGGTGAAATGCTAAAGCAC[TATATATATATATATATA]CATGTTGTCAGCACTCCTGCCTCTTACGGGCACTGAATAAATTC	GCTTAGAAACAAGCCAAACAAAA	59.829	GAATTTATTCAGTGCCCGTAAGA	59.533
Unigene6953	GGCGGCGGCGGCGGC	GGC(3*5)	GTCGAGATCCTCGTATCACTGGGCCTTCGTTGGT[GGCGGCGGCGGCGGC]TGGGCTTATGAATGCCGGGTGTTGTGTGTACGACATGGGACTCGCCACTACTCCCGCCTGCTTCATGAGCACCATTCTCCCTGGATTCGGTTATGATGCTTCCATTATGT	GTCGAGATCCTCGTATCACTGG	61.038	ACATAATGGAAGCATCATAACCG	60.108
Unigene6965	GAGAGAGAGAGA	GA(2*6)	GGAACGAGAACGTATACTCATGGAGCAGGCTTG[GAGAGAGAGAGA]AGAGCAAAGGCGTGTTAGAGAGGAAGGACGTGCAGAAAAGCGAGATGCCCTTCTTCACACTTTGCTCAACAGACTTATTCGTGAA	GGAACGAGAACGTATACTCATGG	59.906	TTCACGAATAAGTCTGTTGAGCA	59.934
Unigene697	ATATATATATATATATATAT	AT(2*10)	TGTGTACTTGATCGCATGTTGTTCCGTGGGTGTAAGGAATCAGCTGAGTCACCTTGTAATAAAATTGAAAAATGTTAGA[ATATATATATATATATATAT]TTGTCATTGAGTTTCTTGCTCATTGAAATAGGCCTA	TGTGTACTTGATCGCATGTTGTT	60.476	TAGGCCTATTTCAATGAGCAAGA	60.226
Unigene7024	GAAGAAGAAGAAGAA	GAA(3*5)	GAGGATCTTCTTCACAAAAAGCCGAAGCC[GAAGAAGAAGAAGAA]GACCAGAGATCAAACCCTGGGATCGCGCATCCAGCTTCGGTGTACGGCCATCCAGAAGTTTCTTCTAGACCAGACCACC	GAGGATCTTCTTCACAAAAAGCC	60.584	GGTGGTCTGGTCTAGAAGAAACTT	59.251
Unigene7119	ATCATCATCATCATC	ATC(3*5)	GAGTAGAGCAATGAATTTTGCGTAAGGCAACAAG[ATCATCATCATCATC]GCCAGCCAACAAAGATATAGTCAATCTCTCAAGTTCCGCTGCAGCAACCCCAAGTTGGACTACATAG	GAGTAGAGCAATGAATTTTGCGT	59.812	CTATGTAGTCCAACTTGGGGTTG	59.806
Unigene7142	CCGCCTCCGCCTCCGCCTCCGCCT	CCGCCT(6*4)	CAGATAAACAAGATTGCAAACCCCAAGTACCCGCTTCCAGA[CCGCCTCCGCCTCCGCCTCCGCCT]CCGCCACCTCCAACTGTGCCGGAAAGGCAGCCCTCTGAGAAGAATTTTGCTA	CAGATAAACAAGATTGCAAACCC	59.891	TAGCAAAATTCTTCTCAGAGGGC	61.164
Unigene719	GGAGGAGGAGGAGGA	GGA(3*5)	ATGAATCCCCAAATACCAAAGTTGAGAGATTTATATG[GGAGGAGGAGGAGGA]TGAGAATTGGTTGAACAATCTGCCGGTTTTGGAGGCAGACATGACATGGGATGTTCTCAGTGGATGTTCAGA	ATGAATCCCCAAATACCAAAGTT	59.847	TCTGAACATCCACTGAGAACATC	59.201
Unigene7291	CCTCCTCCTCCTCCT	CCT(3*5)	TAGCTATGTTTGGTCTCCTCCTCCTCCG[CCTCCTCCTCCTCCT]GCTAATCCGATCCTTCCTGAGGATCGAACTCCTGACGACCAGTGGGCTTCGTCACAGTATTCAGGCACGCCTTCCTATATTTATCAGGG	TAGCTATGTTTGGTCTCCTCCTC	58.927	CCCTGATAAATATAGGAAGGCGT	59.755
Unigene7318	AAGAAGAAGAAGAAG	AAG(3*5)	GAAATTTGTGGGAGTGGTGACGGTGCGACCGTGGGCTA[AAGAAGAAGAAGAAG]TCAAGGGGGCCACCTCATCCTCGCAATCCTCTTCCTCATCTCCTATTCC	GAAATTTGTGGGAGTGGTGAC	59.298	GGAATAGGAGATGAGGAAGAGGA	60.048
Unigene732	CTCCTCCTCCTCCTC	CTC(3*5)	TGGGTAGATCTTTTTCCTCAACATTTTCATAACCCACTTTTTGGGACGATATT[CTCCTCCTCCTCCTC]CTTTCCATTTAAAAACCTTCTTCACAAACGAACGACCAGACTTTGGCATATGTTTC	TGGGTAGATCTTTTTCCTCAACA	59.987	GAAACATATGCCAAAGTCTGGTC	59.891
Unigene7355	GAGAGAGAGAGAGAGA	GA(2*8)	TAAACATTACTTTTGCGTGTCCCAATCCCCACTCACACATATGCATGCATGTGCGAATCCAGTGACGCATGACGCATGCATGCATGTGCAAACACAAAAGAAT[GAGAGAGAGAGAGAGA]GCATATTCTGAAACCCTATGCAGC	TAAACATTACTTTTGCGTGTCCC	60.276	GCTGCATAGGGTTTCAGAATATG	60.003
Unigene7360	CTCTCTCTCTCTCTCT	CT(2*8)	AGTACACCAAAAGGGTGTCTCAATGCAGCTGTAAGCACTATCATCACAAAGAAAACCAATGAATTTGCCAAAAGTGTATTTCGAGAAAAGCCA[CTCTCTCTCTCTCTCT]TTATAAACATCAACAGTTTGTCTGTTGATCCCAGT	AGTACACCAAAAGGGTGTCTCAA	59.95	ACTGGGATCAACAGACAAACTGT	59.952
Unigene7371	TCTCTCTCTCTC	TC(2*6)	TCTTTACATTTGCAACGAAACCTGCAGTCTTTTATAGTTCAAAG[TCTCTCTCTCTC]CCCTATTCCTCATAAATATGACTAAAAAATTACCTCGACTAAAGCTCCCGGGTTTAGCTCCAATTTTAGTGACACGAGT	TCTTTACATTTGCAACGAAACCT	60.05	ACTCGTGTCACTAAAATTGGAGC	59.709
Unigene7602	TTGTTGTTGTTGTTG	TTG(3*5)	CATTTCTTGTTGTTGATTGGGATC[TTGTTGTTGTTGTTG]GTTAGGATCGAATTGTTGCTGTTGTTGGTTAGGATCTTGTTGTTGTTGGCTGGATCCACCTGATTGTTGTTGGCCAGTATTACCATATTGC	CATTTCTTGTTGTTGATTGGGAT	60.102	GCAATATGGTAATACTGGCCAAC	59.662
Unigene7889	ATATATATATATATAT	AT(2*8)	AAAATTCAAAAAGACCAAACCGTAGACCGTAATTGAC[ATATATATATATATAT]ACATGTCAGGCACATCAGCTGAAAAGCAGCCATTTTTCAATGTTTGTGCCGTCATGTAAAAACACATATGTCTACAATATGTTTGGGTGGCAGT	AAAATTCAAAAAGACCAAACCGT	60.133	ACTGCCACCCAAACATATTGTAG	60.176
Unigene8271	ATTATTATTATTATTATTATT	ATT(3*7)	CTCAGCAGTACTGGGTCTAGAGGGAGTCCGTGAACGATCCGGGGTTCTGGATCTTCTCTGTTCTGG[ATTATTATTATTATTATTATT]GTTTGCTGCTGCTAATTTGACATGGTTCGAATCTCTTGCTTTGTCGAGTGT	CTCAGCAGTACTGGGTCTAGAGG	59.595	ACACTCGACAAAGCAAGAGATTC	59.942
Unigene8542	TGGTGGTGGTGGTGGTGGTGG	TGG(3*7)	GAAGGAGGAGGTGGAGGATTTGGTGGTGGTGATGGCCATGGAGGAGGATT[TGGTGGTGGTGGTGGTGGTGG]TGAAGGAGGAGGGGGATTTGGAGGTGATTTTTGTGGGTTAAGGCTGAATA	GAAGGAGGAGGTGGAGGATTT	60.802	TATTCAGCCTTAACCCACAAAAA	59.892
Unigene8556	ATTATTATTATTATT	ATT(3*5)	ACAAAAGCCACATTTCTTTTCAGCGGGGCAGC[ATTATTATTATTATT]ATGCACAGGGGATACATAAACCAGGTCTGATTAACAGACGGTTCAGGCATCCTACACTGTTTATGCAACTTCATTCACAATCAAACA	ACAAAAGCCACATTTCTTTTCAG	59.695	TGTTTGATTGTGAATGAAGTTGC	60.032
Unigene8578	TCTTCTTCTTCTTCTTCT	TCT(3*6)	ACAAAAACCTCATAAACAGCCAAATTTTTTGTTTGCAATTGGTCCTCCTCCAAGGCC[TCTTCTTCTTCTTCTTCT]AAGAATGCAGTTCCAACCACTCTAGTGTCAACATCATCATGGC	ACAAAAACCTCATAAACAGCCAA	59.926	GCCATGATGATGTTGACACTAGA	60.015
Unigene8609	TGCTGCTGCTGCTGCTGCTGC	TGC(3*7)	CTCAAACTTGTTGAGGGCGGCGCCGAGCTCCCAGGCGGACAGCATGTGGCGAGCGAGGCGGTCCCTGCCGCCGCCGGGCTGGTGGTGG[TGCTGCTGCTGCTGCTGCTGC]CCTCCGCCGTGGCGCTGCATGATCTTGCGAGCCTCGT	CTCAAACTTGTTGAGGGCG	59.425	ACGAGGCTCGCAAGATCA	60.675
Unigene8628	ATATATATATATAT	AT(2*7)	ATCCAAAAATGTACTCCATGCCCTGAGGCTGACACTCGTGGCACTGTCAACCATCGACC[ATATATATATATAT]AACAAAATCAGTCTTCCCTCCTTTTCAG	ATCCAAAAATGTACTCCATGCC	60.082	CTGAAAAGGAGGGAAGACTGATT	60.115
Unigene8861	CACACACACACACA	CA(2*7)	TATATCTCCCCCACATCACCATATACCCTGATTTTAAAAATGGCTTCCACGTACCAGCACCCACACCCATCCCAGATTCCC[CACACACACACACA]CCCATGATCCCTGATAATGAAGCAAATGTC	TATATCTCCCCCACATCACCATA	60.286	GACATTTGCTTCATTATCAGGGA	60.326
Unigene8892	TGCTGCTGCTGCTGCTGC	TGC(3*6)	ATAGACATCTGAAAGGCCGAAATTGGATGCGCGAGGGCTCAT[TGCTGCTGCTGCTGCTGC]TCTGTTGGTGAACAGGGAATAGAAATCAGCATGA	ATAGACATCTGAAAGGCCGAAAT	60.335	TCATGCTGATTTCTATTCCCTGT	59.979
Unigene9027	TTATTTATTTATTTATTTAT	TTAT(4*5)	CAGGTAAGAAAGAAAAGGGGTGTTTACAAGTAAGGCACGGAAATAAAACATGGAAGTGAGGGCATAACAAGAGTCTTCTACTCATTCCTTTCCACCCAAACCCAAGGGTTC[TTATTTATTTATTTATTTAT]GAGCTGCTGTTTACCAAGAACCTTT	CAGGTAAGAAAGAAAAGGGGTGT	59.922	AAAGGTTCTTGGTAAACAGCAGC	61.002
Unigene9036	TCTTCTTCTTCTTCT	TCT(3*5)	AAAACCATTCCTGGATGTATCTGGTTGCCATGGAATGTTGTCCCGCCC[TCTTCTTCTTCTTCT]TACTACTCTTCTTCTTCCCGTTACCC	AAAACCATTCCTGGATGTATCTG	59.255	GGGTAACGGGAAGAAGAAGAGTA	60.011
Unigene9077	GCTGCTGCTGCTGCTGCT	GCT(3*6)	TCCATGGAATTCTCTGTTTGAGTTCGTAGTCAAAGCGACGATCGTGATTATCATAATGATCTTCTTCTTCTCTGTATTGATCCGACGGTGATGGTCCGACTGTGCGCCTCC[GCTGCTGCTGCTGCTGCT]GATAATTTTGGTTATCGTCTCTAGCCAA	TCCATGGAATTCTCTGTTTGAGT	59.99	TTGGCTAGAGACGATAACCAAAA	60.134
Unigene9314	ATGATGATGATGATG	ATG(3*5)	GCAATAAAAGTCATTGATCCTGCTGCTGTTCTTCAAGAATCAAGTATGCCTGGATCCCCAAATAGTTTGATCA[ATGATGATGATGATG]GTGCTTCTTTGCCAAGCCTTGGTGGTGAGAATCCTTTGAGTCGAAGA	GCAATAAAAGTCATTGATCCTGC	59.989	TCTTCGACTCAAAGGATTCTCAC	59.878
Unigene932	AGGCCAAGGCCAAGGCCAAGGCCA	AGGCCA(6*4)	ATCGCGGTAGTTTGTTTCCTTAGCTATGGATCGTGGAGGCAACTTTGGTGGAAGAGGAAGAGGAAAAGGTGGAAATGGAGGAGGGCGAGGCCGAGGGCG[AGGCCAAGGCCAAGGCCAAGGCCA]GGGCCAGGGCCAGGGCCAAGGTCAAGGTCAAGGTCAG	ATCGCGGTAGTTTGTTTCCTTAG	60.841	CTGACCTTGACCTTGACCTTG	59.748
Unigene944	ATATATATATATATATAT	AT(2*9)	CCTTGTCAGATGAACTTTGGAGTTTTCTTATTTCATACTCAATATTCGCTGATAGTGCAGTAACTTATTCC[ATATATATATATATATAT]GATCAGCGATCACATGCACTGTGCAAAGATGAGGTGAATAGCAAT	CCTTGTCAGATGAACTTTGGAGT	59.668	ATTGCTATTCACCTCATCTTTGC	59.648
Unigene9477	ATATATATATATATAT	AT(2*8)	AAGCAGTTTTCCCAATGACATACAACTACAGGAAATTCCAACTTCATGAAGCCTTGTGATCCAC[ATATATATATATATAT]GGAGTCATGCCACCTTAATCTAGTTCAGTTCATAAACCCCATTATCTGATATTGCTCTTCAGAAATGGTAAATTGC	AAGCAGTTTTCCCAATGACATAC	59.428	GCAATTTACCATTTCTGAAGAGC	59.306
Unigene9681	GTTTGTTTGTTTGTTTGTTT	GTTT(4*5)	CATGGCAGTGCTTGTTATTTGTAGTGGGAATTGAAACTGTTCTTACTTTTTAGACTTATTTTAAATG[GTTTGTTTGTTTGTTTGTTT]TTTTTAAATTGTGGTTTGACATCTGTTTCTAGTATTAGCCGGAAAAGCTGAGGGCTCAAACATAACT	CATGGCAGTGCTTGTTATTTGTA	60.068	AGTTATGTTTGAGCCCTCAGCTT	60.65
Unigene993	TGCTGCTGCTGCTGC	TGC(3*5)	GATAATGATAATGCAAATGGGGATCCTCAATCTCCAATCCACAGCAACATTTTACAGTTTTCTTCCCCTCTTCAATGCCCCTACGATGATGACGA[TGCTGCTGCTGCTGC]TGAAGATCACAGTCTCAGCTGAACAGAAGCTCCATGAATA	GATAATGATAATGCAAATGGGGA	59.9	TATTCATGGAGCTTCTGTTCAGC	60.755
Unigene9943	GAGAGAGAGAGA	GA(2*6)	TACACAAAGACAAGAGGGGAACATGATGTTTCTCTCTGTATGT[GAGAGAGAGAGA]GTTACTCTGCTTGCACTTAGTAATATTTTGAGCCACACGGGCGTTATCAGGCCAAGCGACTTGAATGCTGAATACTATTCATATTCCTCCATCTGGGAG	TACACAAAGACAAGAGGGGAACA	60.917	CTCCCAGATGGAGGAATATGAAT	60.517
Unigene9951	CATCATCATCATCATCAT	CAT(3*6)	AACAGATGTGTCAGTCTGCCATTCCACTC[CATCATCATCATCATCAT]CAGCTTCCTCATCATGGGCTTCTTGGCTCCCTCGAGGAGATTGATCATCCTCATCAGAAGATTTCTTCTTTGACACCTTTGAATTCACATCGTTGTTTTTCTTCTTCTTTGG	AACAGATGTGTCAGTCTGCCATT	60.986	CCAAAGAAGAAGAAAAACAACGA	59.795

## Sheet: Table S3
Table S3. PCR primers ID used for Figure 6.
Order	Primer ID
1	Unigene7889
2	Unigene34135
3	Unigene9077
4	Unigene7360
5	Unigene5882
6	CL2210.Contig5
7	CL161.Contig1
8	CL6368.Contig2
9	Unigene932
10	CL8184.Contig1
11	Unigene12772
12	Unigene9951
13	Unigene9943
14	Unigene8556
15	CL2545.Contig1
16	CL10187.Contig1
17	CL2352.Contig3
18	CL3480.Contig1
19	CL2870.Contig2
20	CL2745.Contig1

## Sheet: Table S4
Table S4. PCR primers information used for Figure 7.
Primer Order	ID	SSR	SSR	Sequence	FORWARD PRIMER1 (5'-3')	Tm	REVERSE PRIMER1 (5'-3')	Tm	Similar species	Annotation
A	CL2715.Contig2	GGAGGAGGAGGAGGA	GGA(3*5)	CGAGATCTTGATTAACGTTCCACTCTGCAGCGAGGGCAACCTCGGCGGAGGCCGCCTCTCGGCGCAAAGAAGG[GGAGGAGGAGGAGGA]TGAGGCCTTAGCGACCAAATCCGTGGAGGATGCGCCTGACTGGCAGCATATCGTCGTTTCTTTCGAAGT	CGAGATCTTGATTAACGTTCCAC	60.014	ACTTCGAAAGAAACGACGATATG	59.68	Picea sitchensis	unknown [Picea sitchensis]
B	CL2745.Contig1	AAATAAATAAATAAATAAAT	AAAT(4*5)	TGTAAGTGTTGAGGAAATTGACAATGTTTAAAACATATAAAGCATTTCCAATATGAAAAGTTAGATTTGATCGGTAGTGGATCTATACAA[AAATAAATAAATAAATAAAT]CCTTTGTGAATATTTAAATGGAAAACAAATAAACCATGTCT	TGTAAGTGTTGAGGAAATTGACA	57.351	AGACATGGTTTATTTGTTTTCCA	57.617	Picea sitchensis	unknown [Picea sitchensis]
C	CL9120.Contig1	GTGTGTGTGTGTGTGT	GT(2*8)	CAAAAATCCTCAGAAGTGGAGTGTCCTAAGA[GTGTGTGTGTGTGTGT]ATATATAGCATTTGTATTTCAAAAAAAACATCGATCCTAATAGTTTAGAATTGGCATCCATAGTACATTAATGATTAATCATTCAAACATCAACCATCTAGAA	CAAAAATCCTCAGAAGTGGAGTG	60.151	TTCTAGATGGTTGATGTTTGAATGA	59.891	Pinus taeda	hypothetical protein 0_2551_02, partial [Pinus taeda] >gi|383175219|gb|AFG71034.1| hypothetical protein 0_2551_02, partial [Pinus taeda]
D	CL6239.Contig2	CCTCCTCCTCCTCCT	CCT(3*5)	CATCTCCATTCTCAACTGGTTTGGCCACAGGAATATCGCGA[CCTCCTCCTCCTCCT]TCCAAATCCCCATCAATGCACGACGCGCATCTTCGTTCCATCCAGCCGACGCAGTCATATTTGCTGTTTGCACTGAA	CATCTCCATTCTCAACTGGTTTG	60.889	TTCAGTGCAAACAGCAAATATGA	60.664	Pinus taeda	hypothetical protein 0_10044_01, partial [Pinus taeda] >gi|383159149|gb|AFG61999.1| hypothetical protein 0_10044_01, partial [Pinus taeda]
